# Supplementary material for: Two short low complexity regions (LCRs) are hallmark sequences of the Delta SARS-CoV-2 variant spike protein
Source: PubMed Central journal article supplement (PMC8766472; doi:10.1038/s41598-022-04976-8), 2022-01-18
Supplement: 41598_2022_4976_MOESM4_ESM.pdf [file 41598_2022_4976_MOESM4_ESM.pdf]

>lcl|MZ434666.1\_prot\_QWX08260.1\_3 [gene=S] [protein=surface glycoprotein]  
[protein\_id=QWX08260.1] [location=21512..25324] [gbkey=CDS]  
MFVFLVLLPLVSSQCVNLTIRTLQPPAYTNSFTRGVYYPDKVFRSSVLHSTQDLFLPFFS  
NVTWFHAI--SGTNGTKRFDXXXXXXXXXXXXXXXXXKSNIIRGWIFGTTLDSKTQSLIV  
NNATNVVIKVFCEFCNDPFLGV-YHKNKSWMESEFRVYSSANNCTFEYVSQPFMDLE  
GKQGNFKNLREFVFKNIDGYFKIYSKHTPINLVRDLPOGFSALEPLVDLPIGINITRFQT  
LLALHRSYLTPGDSSSGWTAGAAAYVGYLQPRTFLLKYNENGTITDAVDCALDPLSETK  
CTLKSFTVEKGIYQTSNFRVQPTESIVRFPNITNLCPFGEVFNATRFASVYAWNRRKRISN  
CVADYSVLVNSASFSTFKCYGVSPTKLNLDLFCFTNVYADSFVIRGDEVRQIAPGQTGKIAD  
YNYKLPDDFTGCVIAWNSNNLDSKVGGNYNLYRLFRKSNLKPFERDISTEIQAGSTPC  
NGVEGFNCYFPLQSYGFQPTYGVGYQPYRVVLSFELLHAPATVCGPKKSTNLVKNKCVN  
FNFENGLTGTGVLTESNKKFLPFQQFGRDIDTTDAVRDPQTLEILDITPCSFGGVSVITP  
GTNTSNQVAVLYQGVNCTEVPVAIHADQLTPTWRVYSTGNSNVFQTRAGCLIGAEHVNSY  
ECDIPIGAGICASYQTQTNSHRRARSVASQSI IAYTMSLGAENSVAYSNNSIAIPI NFTI  
SVTTEILPVSMTKTSVDCTMYICGDSTECNLLLQYGSFCTQLNRALTGIAVEQDKNTQE  
VFAQVKQIYKTPPIKDFGGFNFSQILPDPSKPSKRSFIEDLLFNKVTLADAGFIKQYGDC  
LGDIAARDLICAQKFNGLTVLPPLLTDEMIAQYTSALLAGTITSGWTFGAGAALQIPFAM  
QMAYRFNGIGVTQNVLYENQKLIANQFNSAIGKIQDSLSTASALGKLQDVVNQNAQALN  
TLVKQLSSNFGAISSVLNDILARLDKVEAEVQIDRLITGRLQSLQTYVTQQILIRAAEIRA  
SANLAATKMSECVLGQSKRVDFCGKGYHLSFPPQSAPHGVVFLHVTYVPAQEKNFTTAPA  
ICHGKAHFPREGVFSNGTHWFVTQRNFYEPQIITHTNTFVSGNCDVVI GIVNNTVYDP  
LQPELDSFKEELDKYFKNHTSPDVLGDISGINASVVNIQKEIDRLNEVAKNLNESLIDL  
QELGKYEQYIKWPWYIWLGFIAGLIAIVMVTIMLCCMTSCCCLKGCCSCGSCCKFDEDD  
SEPVKLGVKLHYT

>lcl|MZ554580.1\_prot\_QXN04039.1\_3 [gene=S] [protein=surface glycoprotein]  
[protein\_id=QXN04039.1] [location=21524..25345] [gbkey=CDS]  
MFVFLVLLPLVSSQCVNLTTRTQLPPAYINSLTRGVYYPDKVFRSSVLHSTQDLFLPFFS  
NVTWFHAIHVSNTNGTKRFDNPVLPFNDGVYFASTEKSNIIRGWIFGTTLDSKTQSLIV  
NNATNVVIKVFCEFCNDPFLGVYHKNKSWTESESRVYSSANNCTFEYVSQPFMDLE  
GKQGNFKNLREFVFKNIDGYFKIYSKHTPINLVRDLPOGFSALEPLVDLPIGINITRFQT  
LLALHRSYLTPVDSSSGWTAGAAAYVGYLQPRTFLLKYNENGTITDAVDCALDPLSETK  
CTLKSFTVEKGIYQTSNFRVQPTESIVRFPNITNLCPFGEVFNATRFASVYAWNRRKRISN  
CVADYSVLVNSASFSTFKCYGVSPTKLNLDLFCFTNVYADSFVIRGDEVRQIAPGQTGKIAD  
YNYKLPDDFTGCVIAWNSNNLDSKVGGNYNLYRLFRKSNLKPFERDISTEIQAGNTPC  
NGVKGFNCYFPLQSYGFQPTNGVGYQPYRVVLSFELLHAPATVCGPKKSTNLVKNKCVN  
FNFENGLTGTGVLTESNKKFLPFQQFGRDIADTTDAVRDPQTLEILDITPCSFGGVSVITP  
GTNTSNQVAVLYQGVNCTEVPVAIHADQLTPTWRVYSTGNSNVFQTRAGCLIGAEYVNSY  
ECDIPIGAGICASYQTQTNSHRRARSVASQSI IAYTMSLGAENSVAYSNNSIAIPTNFTI  
SVTTEILPVSMTKTSVDCTMYICGDSTECNLLLQYGSFCTQLNRALTGIAVEQDKNTQE  
VFAQVKQIYKTPPIKDFGGFNFSQILPDPSKPSKRSFIEDLLFNKVTLADAGFIKQYGDC  
LGDIAARDLICAQKFNGLTVLPPLLTDEMIAQYTSALLAGTITSGWTFGAGAALQIPFAM  
QMAYRFNGIGVTQNVLYENQKLIANQFNSAIGKIQHLSLSTASALGKLQDVVNQNAQALN  
TLVKQLSSNFGAISSVLNDILSRLDKVEAEVQIDRLITGRLQSLQTYVTQQILIRAAEIRA  
SANLAATKMSECVLGQSKRVDFCGKGYHLSFPPQSAPHGVVFLHVTYVPAQEKNFTTAPA  
ICHGKAHFPREGVFSNGTHWFVTQRNFYEPQIITDNTFVSGNCDVVI GIVNNTVYDP  
LQPELDSFKEELDKYFKNHTSPDVLGDISGINASVVNIQKEIDRLNEVAKNLNESLIDL  
QELGKYEQYIKWPWYIWLGFIAGLIAIVMVTIMLCCMTSCCCLKGCCSCGSCCKFDEDDH  
SEPVKLGVKLHYT

>lcl|MZ411886.1\_prot\_QWT98319.1\_3 [gene=S] [protein=surface glycoprotein]  
[protein\_id=QWT98319.1] [location=21452..25273] [gbkey=CDS]  
MFVFLVLLPLVSSQCVNFTNRTQLPSAYTNSFTRGVYYPDKVFRSSVLHSTQDLFLPFFS  
NVTWFHAIHVSNTNGTKRFDNPVLPFNDGVYFASTEKSNIIRGWIFGTTLDSKTQSLIV  
NNATNVVIKVFCEFCNYPFLGVYHKNKSWMESEFRVYSSANNCTFEYVSQPFMDLE  
GKQGNFKNLSEFVFKNIDGYFKIYSKHTPINLVRDLPOGFSALEPLVDLPIGINITRFQT  
LLALHRSYLTPGDSSSGWTAGAAAYVGYLQPRTFLLKYNENGTITDAVDCALDPLSETK  
CTLKSFTVEKGIYQTSNFRVQPTESIVRFPNITNLCPFGEVFNATRFASVYAWNRRKRISN  
CVADYSVLVNSASFSTFKCYGVSPTKLNLDLFCFTNVYADSFVIRGDEVRQIAPGQTGTIAD  
YNYKLPDDFTGCVIAWNSNNLDSKVGGNYNLYRLFRKSNLKPFERDISTEIQAGSTPC

NGVKGFNCYFPLQSYGFQPTYGVGYQPYRVVLSFELLHAPATVCGPKKSTNLVKNKCVN  
FNFNGLTGTGVLTESNKKFLPFQQFGRDIADTTDAVRDPQTEILDITPCSFGGVSVITP  
GTNTSNQVAVLYQGVNCTEVPVAIHADQLTPTWRVYSTGNSVFQTRAGCLIGAEYVNNNSY  
ECDIPIGAGICASYQTQTNSPRRARSVASQSI IAYTMSLGAENSVAYSNNNSIAIPTNFTI  
SVTTEILPVSMKTSTVDCTMYICGDSTECNSLLLQYGSFCTQLNRALTGIAVEQDKNTQE  
VFAQVKQIYKTPPIKDFGGFNFSQILPDPSKPSKRSFIEDLLFNKVTLADAGFIKQYGDC  
LGDIAARDLICAQKFNGLTVLPPLLTDEMIAQYTSALLAGTITSGWTFGAGAALQIPFAM  
QMAYRFNGIGVTONVLYENQKLIANQFNSAIGKIQDSLSTASALGKLQDVVNQNAQALN  
TLVKQLSSNFGAISSVLNDILSRLDKVEAEVQIDRLITGRLQSLQTYVTQQILIRAAEIRA  
SANLAAIKMSECVLQSKRVDFCGKGYHLMSFPQSAPHGVVFLHVTVYVPAQEKNFTTAPA  
ICHDGKAHFPREGVFSVNGTHWFVTQRNFYEPQIITDNTFVSGNCDVVI GIVNNTVYDP  
LQPELDSFKEELDKYFKNHTSPDVLGDISGINASFVNIQKEIDRLNEVAKNLNESLIDL  
QELGKYEQYIKWPWYIWLGFIAGLIAIVMVTIMLCCMTSCCCLKGCCSCGSCCKFDEDD  
SEPVKGVKLYHT

>lcl|MZ532900.1\_prot\_QXL03050.1\_3 [gene=S] [protein=surface glycoprotein]  
[protein\_id=QXL03050.1] [location=21521..25336] [gbkey=CDS]  
MFVFLVLLPLVSSQCVNLRTRTQLPPAYTNSFTRGVYYPDKVFRSSVLHSTQDLFLPFFS  
NVTWFHAIHVSNGTNGTKRFDNPVLPFNDGVYFASTEKSNIRGWIFGTTLDLKTQSLLIV  
NNATNVVIKVCEFFQFCNDPFLDVYYHKNKSWMESG--VYSSANNCTFEYVSQPFMLDLE  
GKQGNFKNLREFVFKNIDGYFKIYSKHTPINLVRDLPQGFSALEPLVDLPIGINITRFQT  
LLALHRSYLT PGDSSSGWTAGAAAAYVGYLQPRTFLLKYNENGTITDAVDCALDPLSETK  
CTLKSFTVEKGIYQTSNFRVQPTESIVRFPNITNLCPFGEVFNATRFASVYAWNRRKRISN  
CVADYSVLVNSASFSTFKCYGVSPTKLNLDLCTNVYADS FVIRGDEVQRQIAPGQTGKIAD  
YNYKLPDDFTGCVIAWNSNNLDSKVGNYNYRYRLFRKSNLKPFERDISTEIQAGSKPC  
NGVEGFNCYFPLQSYXXXXXNGVGYQPYRVVLSFELLHAPATVCGPKKSTNLVKNKCVN  
FNFNGLTGTGVLTESNKKFLPFQQFGRDIADTTDAVRDPQTEILDITPCSFGGVSVITP  
GTNTSNQVAVLYQGVNCTEVPVAIHADQLTPTWRVYSTGNSVFQTRAGCLIGAEHVNNNSY  
ECDIPIGAGICASYQTQTNSRRWARSVASQSI IAYTMSLGAENSVAYSNNNSIAIPTNFTI  
SVTTEILPVSMKTSTVDCTMYICGDSTECNSLLLQYGSFCTQLNRALTGIAVEQDKNTQE  
VFAQVKQIYKTPPIKDFGGFNFSQILPDPSKPSKRSFIEDLLFNKVTLADAGFIKQYGDC  
LGDIAARDLICAQKFNGLTVLPPLLTDEMIAQYTSALLAGTITSGWTFGAGAALQIPFAM  
QMAYRFNGIGVTONVLYENQKLIANQFNSAIGKIQDSLSTASALGKLQNVVNQNAQALN  
TLVKQLSSNFGAISSVLNDILSRLDKVEAEVQIDRLITGRLQSLQTYVTQQILIRAAEIRA  
SANLAATKMSECVLQSKRVDFCGKGYHLMSFPQSAPHGVVFLHVTVYVPAQEKNFTTAPA  
ICHDGKAHFPREGVFSVNGTHWFVTQRNFYEPQIITDNTFVSGNCDVVI GIVNNTVYDP  
LQPELDSFKEELDKYFKNHTSPDVLGDISGINASVNIQKEIDRLNEVAKNLNESLIDL  
QELGKYEQYIKWPWYIWLGFIAGLIAIVIVTIMLCCMTSCCCLKGCCSCGSCCKFDEDD  
SEPVKGVKLYHT

>lcl|MZ306939.1\_prot\_QVX53289.1\_3 [gene=S] [protein=surface glycoprotein]  
[protein\_id=QVX53289.1] [location=21509..25324] [gbkey=CDS]  
MFVFLVLLPLVSSQCVNLRTRTQLPPAYTNSFTRGVYYPDKVFRSSVLHSTQDLFLPFFS  
NVTWFHAIHVSNGTNGTTRFDNPVLPFNDGVYFASTEKSNIRGWIFGTTLDLKTQSLLIV  
NNATNVVIKVCEFFQFCNDPFLDVYYHKNKSWMESG--VYSSANNCTFEYVSQPFMLDLE  
GKQGNFKNLREFVFKNIDGYFKIYSKHTPINLVRDLPQGFSALEPLVDLPIGINITRFQT  
LLALHRSYLT PGDSSSGWTAGAAAAYVGYLQPRTFLLKYNENGTITDAVDCALDPLSETK  
CTLKSFTVEKGIYQTSNFRVQPTESIVRFPNITNLCPFGEVFNATRFASVYAWNRRKRISN  
CVADYSVLVNSASFSTFKCYGVSPTKLNLDLCTNVYADS FVIRGDEVQRQIAPGQTGKIAD  
YNYKLPDDFTGCVIAWNSNNLDSKVGNYNYLYRLFRKSNLKPFERDISTEIQAGSTPC  
NGVEGFNCYFPLQSYGFQPTYGVGYQPYRVVLSFELLHAPATVCGPKKSTNLVKNKCVN  
FNFNGLTGTGVLTESNKKFLPFQQFGRDIDTTDAVRDPQTEILDITPCSFGGVSVITP  
GTNTSNQVAVLYQGVNCTEVPVAIHADQLTPTWRVYSTGNSVFQTRAGCLIGAEHVNNNSY  
ECDIPIGAGICASYQTQTNSHRRARSVASQSI IAYTMSLGAENSVAYSNNNSIAIPINFTI  
SVTTEILPVSMKTSTVDCTMYICGDSTECNSLLLQYGSFCTQLNRALTGIAVEQDKNTQE  
VFAQVKQIYKTPPIKDFGGFNFSQILPDPSKPSKRSFIEDLLFNKVTLADAGFIKQYGDC  
LGDIAARDLICAQKFNGLTVLPPLLTDEMIAQYTSALLAGTITSGWTFGAGAALQIPFAM  
QMAYRFNGIGVTONVLYENQKLIANQFNSAIGKIQDSLSTASALGKLQDVVNQNAQALN  
TLVKQLSSNFGAISSVLNDILARLDKVEAEVQIDRLITGRLQSLQTYVTQQILIRAAEIRA  
SANLAATKMSECVLQSKRVDFCGKGYHLMSFPQSAPHGVVFLHVTVYVPAQEKNFTTAPA

ICHDGKAHFPREGVFSVNGTHWFVTQRNFYEPQIIITDNTFVSGNCDVVIGIVNNTVYDP  
LQPELDSFKEELDKYFKNHTSPDVDLGDISGINASVVNIQKEIDRLNEVAKNLNESLIDL  
QELGKYEQYIKWPWYIWLGFIAGLIAIVMVTIMLCCMTSCCCLKGCCSCGSCCKFDEDD  
SEPVLLKGVKLLHYT

>lcl|MZ412056.1\_prot\_QWU00312.1\_3 [gene=S] [protein=surface glycoprotein]  
[protein\_id=QWU00312.1] [location=21452..25264] [gbkey=CDS]  
MFVFFVLLPLVSSQCVNLTTRTQLPPAYTNSFTRGVYYPDKVFRSSVLHSTQDLFLPFFS  
NVTWFHAI--SGTNGTKRFDNPVLPFNDGVYFASTEKSNIIRGWIFGTTLDSKTQSLIV  
NNATNVVIKVFCEFCNDPFLGV-YHKNNKSWMESEFRVYSSANNCTFEYVSQPFMLDLE  
GKQGNFKNLREFVFKNIDGYFKIYSKHTPINLVRDLPQGFSALEPLVDLPIGINITRFQT  
LLALHRSYLTPGDSSSGWTAGAAAYVGYLQPRTFLLKYNENGTITDAVDCALDPLSETK  
CTLKSFTVEKGIYQTSNFRVQPTESIVRFPNITNLCPFGEVFNATRFASVYAWNRRKRISN  
CVADYSVLVNSASFSTFKCYGVSPTKLNLDLFCFTNVYADSFVIRGDEVQRQIAPGQTGKIAD  
YNYKLPDDFTGCVIAWNSNNLDSKVGGNYNLYRLFRKSNLKPFERDISTEIQAGSTPC  
NGVEGFNCYFPLQSYGFQPTYGVGYQPYRVVLSFELLHAPATVCGPKKSTNLVKNKCVN  
FNFNGLTGTGVLTESNKKFLPFQFGRDIDDDTTDAVRDPQTLEILDITPCSFGGVSVITP  
GTNTSNQVAVLYQGVNCTEVPVAIHADQLTPTWRVYSTGNSVVFQTRAGCLIGAEHVNSY  
ECDIPIGAGICASYQTQTNSHRRARSVASQSI IAYTMSLGAENSVAYSNNIAIPIINFTI  
SVTTEILPVSMKTSTVDCTMYICGDSTECNLLLQYGSFCTQLNRALTGIAVEQDKNTQE  
VFAQVKQIYKTPPIKYFGGFNFSQILPDPSKPSKRSFIEDLLFNKVTLADAGFIKQYGDC  
LGDIAARDLICAQKFNGLTVLPLLLTDEMIAQYTSALLAGTITSGWTFGAGAALQIPFAM  
QMAYRFNGIGVTQNVLYENQKLIANQFNSAIGKIQDSLSTASALGKLQDVVNQNAQALN  
TLVKQLSSNFGAISSVLNDILARLDKVEAEVQIDRLITGRLQSLQTYVTQQLIRAAEIRA  
SANLAATKMSECVLQSKRVDFCGKGYHLSFPPQSAPHGVVFLHVTYVPAQEKNFTTAPA  
ICHDGKAHFPREGVFSVNGTHWFVTQRNFYEPQIIITHTNTFVSGNCDVVIGIVNNTVYDP  
LQPELDSFKEELDKYFKNHTSPDVDLGDISGINASVVNIQKEIDRLNEVAKNLNESLIDL  
QELGKYEQYIKWPWYIWLGFIAGLIAIVMVTIMLCCMTSCCCLKGCCSCGSCCKFDEDD  
SEPVLLKGVKLLHYT

>lcl|MZ414596.1\_prot\_QWU53463.1\_3 [gene=S] [protein=surface glycoprotein]  
[protein\_id=QWU53463.1] [location=21551..25363] [gbkey=CDS]  
MFVFLVLLPLVSSQCVNLTTRTQLPPAYTNSFTRGVYYPDKVFRSSVLHSTQDLFLPFFS  
NVTWFHAI--SGTNGTKRFDNPVLPFNDGVYFASTEKSNIIRGWIFGTTLDSKTQSLIV  
NNATNVVIKVFCEFCNDPFLGV-YHKNNKSWMESEFRVYSSANNCTFEYVSQPFMLDLE  
GKQGNFKNLREFVFKNIDGYFKIYSKHTPINLVRDLPQGFSALEPLVDLPIGINITRFQT  
LLALHRSYLTPGDSSSGWTAGAAAYVGYLQPRTFLLKYNENGTITDAVDCALDPLSETK  
CTLKSFTVEKGIYQTSNFRVQPTESIVRFPNITNLCPFGEVFNATRFASVYAWNRRKRISN  
CVADYSVLVNSASFSTFKCYGVSPTKLNLDLFCFTNVYADSFVIRGDEVQRQIAPGQTGKIAD  
YNYKLPDDFTGCVIAWNSNNLDSKVGGNYNLYRLFRKSNLKPFERDISTEIQAGSTPC  
NGVEGFNCYFPLQSYGFQPTYGVGYQPYRVVLSFELLHAPATVCGPKKSTNLVKNKCVN  
FNFNGLTGTGVLTESNKKFLPFQFGRDIDDDTTDAVRDPQTLEILDITPCSFGGVSVITP  
GTNTSNQVAVLYQGVNCTEVPVAIHADQLTPTWRVYSTGNSVVFQTRAGCLIGAEHVNSY  
ECDIPIGAGICASYQTQTNSHRRARSVASQSI IAYTMSLGAENSVAYSNNIAIPIINFTI  
SVTTEILPVSMKTSTVDCTMYICGDSTECNLLLQYGSFCTQLNRALTGIAVEQDKNTQE  
VFAQVKQIYKTPPIKDFGGFNFSQILPDPSKPSKRSFIEDLLFNKVTLADAGFIKQYGDC  
LGDIAARDLICAQKFNGLTVLPLLLTDEMIAQYTSALLAGTITSGWTFGAGAALQIPFAM  
QMAYRFNGIGVTQNVLYENQKLIANQFNSAIGKIQDSLSTASALGKLQDVVNQNAQALN  
TLVKQLSSNFGAISSVLNDILARLDKVEAEVQIDRLITGRLQSLQTYVTQQLIRAAEIRA  
SANLAATKMSECVLQSKRVDFCGKGYHLSFPPQSAPHGVVFLHVTYVPAQEKNFTTAPA  
ICHDGKAHFPREGVFSVNGTHWFVTQRNFYEPQIIITHTNTFVSGNCDVVIGIVNNTVYDP  
LQPELDSFKEELDKYFKNHTSPDVDLGDISGINASVVNIQKEIDRLNEVANNLNESLIDL  
QELGKYEQYIKWPWYIWLGFIAGLIAIVMVTIMLCCMTSCCCLKGCCSCGSCCKFDEDD  
SEPVLLKGVKLLHYT

>lcl|MZ434919.1\_prot\_QWX09653.1\_3 [gene=S] [protein=surface glycoprotein]  
[protein\_id=QWX09653.1] [location=21500..25312] [gbkey=CDS]  
MFVFLVLLPLVSSQCVNLTTRTQLPPAYTNSFTRGVYYPDKVFRSSVLHSTQDLFLPFFS  
NVTWFHAI--SGTNGTKRFDNPVLPFNDGVYFASTEKSNIIRGWIFGTTLDSKTQSLIV  
NNATNVVIKVFCEFCNDPFLGV-YHKNNKSWMESEFRVYSSANNCTFEYVSQPFMLDLE  
GKQGNFKNLREFVFKNIDGYFKIYSKHTPINLVRDLPQGFSALEPLVDLPIGINITRFQT

LLALHRSYLTPGDSSSGWTAGAAAYVGYLQPRTFLLKYNENGTITDAVDCALDPLSETK  
CTLKSFTVEKGIYQTSNFRVQPTESIVRFPNITNLCPFGEVFNATRFASVYAWNRRKRISN  
CVADYSVLVNSASFSTFKCYGVSPTKLNLDLCFTNVYADSFVIRGDEVRQIAPGQTGKIAD  
YNYKLPDDFTGCVIAWNSNNLDSKVGGNYNLYRLFRKSNLKPFERDISTERIYQAGSTPC  
NGVEGFNCYFPLQSYGFQPTYGVGYQPYRVVLSFELLHAPATVCGPKKSTNLVKNKCVN  
FNFNGLTGTGVLTESNKKFLPFQQFGRDIDDDTTDAVRDPQTEILDITPCSFGGVSVITP  
GTNTSNQVAVLYQGVNCTEVPVAIHADQLTPTWRVYSTGSNVFQTRAGCLIGAEHVNSY  
ECDIPIGAGICASYQTQTNSHRRARVASQSI IAYTMSLGAENSVAYSNNSIAIPINFTI  
SVTTEILPVSMTKTSVDCTMYICGDSTECNLLLQYGSFCTQLNRALTGIAVEQDKNTQE  
VFAQVKQIYKTPPIKDFGGFNFSQILPDPSKPSKRSFIEDLLFNKVTLADAGFIKQYGDC  
LGDIAARDLICAQKFNGLTVLPPLLTDEMIAQYTSALLAGTITSGWTFGAGAALQIPFAM  
QMAYRFNGIGVTONVLYENQKLIANQFNSAIGKIQDSLSTASALGKLQDVVNQNAQALN  
TLVKQLSSNFGAISSVLNDILARLDKVEAEVQIDRLITGRLQSLQTYVTQQILIRAAEIRA  
SANLAATKMSECVLQSKRVDFCGKGYHLSFPPQSAPHGVVFLHVTVVPAQEKNFTTAPA  
ICHDGKAHFPREGVFSNGTHWFVTQRNFYEPQIITHTNTFVSGNCDVVI GIVNNTVYDP  
LQPELDSFKEELDKYFKNHTSPDVLGDISGINASVVNIQKEIDRLNEVAKNLNESLIDL  
QELGKYEQYIKWPWYIWLGFIAGLIAIVMVTIMLCCMTSCCCLKGCCSCGSCCKFDEDD  
SEPVKLGVKLHYT

>lcl|MZ411813.1\_prot\_QWT97464.1\_3 [gene=S] [protein=surface glycoprotein]  
[protein\_id=QWT97464.1] [location=21515..25327] [gbkey=CDS]  
MFVFLVLLPLVSSQCVNLTTRTQLPPAYTNSFTRGVYYPDKVFRSSVLHSTQDLFLPFFS  
NVTWFHAI--SGTNGTKRFDNPVLPFNDGVYFASTEKSNIIRGWIFGTTLDSKTQSLIV  
NNATNVVIKVFCEFCNDPFLGV-YHKNNKSWMESEFRVYSSANNCTFEYVSQPFMLDLE  
GKQGNFKNLREFVFKNIDGYFKIYSKHTPINLVRDLPPQGFSALEPLVDLPIGINITRFQT  
LLALHRSYLTPGDSSSGWTAGAAAYVGYLQPRTFLLKYNENGTITDAVDCALDPLSETK  
CTLKSFTVEKGIYQTSNFRVQPTESIVRFPNITNLCPFGEVFNATRFASVYAWNRRKRISN  
CVADYSVLVNSASFSTFKCYGVSPTKLNLDLCFTNVYADSFVIRGDEVRQIAPGQTGKIAD  
YNYKLPDDFTGCVIAWNSNNLDSKVGGNYNLYRLFRKSNLKPFERDISTERIYQAGSTPC  
NGVEGFNCYFPLQSYGFQPTYGVGYQPYRVVLSFELLHAPATVCGPKKSTNLVKNKCVN  
FNFNGLTGTGVLTESNKKFLPFQQFGRDIDDDTTDAVRDPQTEILDITPCSFGGVSVITP  
GTNTSNQVAVLYQGVNCTEVPVAIHADQLTPTWRVYSTGSNVFQTRAGCLIGAEHVNSY  
ECDIPIGAGICASYQTQTNSHRRARVASQSI IAYTMSLGAENSVAYSNNSIAIPINFTI  
SVTTEILPVSMTKTSVDCTMYICGDSTECNLLLQYGSFCTQLNRALTGIAVEQDKNTQE  
VFAQVKQIYKTPPIKDFGGFNFSQILPDPSKPSKRSFIEDLLFNKVTLADAGFIKQYGDC  
LGDIAARDLICAQKFNGLTVLPPLLTDEMIAQYTSALLAGTITSGWTFGAGAALQIPFAM  
QMAYRFNGIGVTONVLYENQKLIANQFNSAIGKIQDSLSTASALGKLQDVVNQNAQALN  
TLVKQLSSNFGAISSVLNDILARLDKVEAEVQIDRLITGRLQSLQTYVTQQILIRAAEIRA  
SANLAATKMSECVLQSKRVDFCGKGYHLSFPPQSAPHGVVFLHVTVVPAQEKNFTTAPA  
ICHDGKAHFPREGVFSNGTHWFVTQRNFYEPQIITHTNTFVSGNCDVVI GIVNNTVYDP  
LQPELDSFKEELDKYFKNHTSPDVLGDISGINASVVNIQKEIDRLNEVAKNLNESLIDL  
QELGKYEQYIKWPWYIWLGFIAGLIAIVMVTIMLCCMTSCCCLKGCCSCGSCCKFDEDD  
SEPVKLGVKLHYT

>lcl|MZ412157.1\_prot\_QWU01502.1\_3 [gene=S] [protein=surface glycoprotein]  
[protein\_id=QWU01502.1] [location=21515..25327] [gbkey=CDS]  
MFVFLVLLPLVSSQCVNLTTRTQLPPAYTNSFTRGVYYPDKVFRSSVLHSTQDLFLPFFS  
NVTWFHAI--SGTNGTKRFDNPVLPFNDGVYFASTEKSNIIRGWIFGTTLDSKTQSLIV  
NNATNVVIKVFCEFCNDPFLGV-YHKNNKSWMESEFRVYSSANNCTFEYVSQPFMLDLE  
GKQGNFKNLREFVFKNIDGYFKIYSKHTPINLVRDLPPQGFSALEPLVDLPIGINITRFQT  
LLALHRSYLTPGDSSSGWTAGAAAYVGYLQPRTFLLKYNENGTITDAVDCALDPLSETK  
CTLKSFTVEKGIYQTSNFRVQPTESIVRFPNITNLCPFGEVFNATRFASVYAWNRRKRISN  
CVADYSVLVNSASFSTFKCYGVSPTKLNLDLCFTNVYADSFVIRGDEVRQIAPGQTGKIAD  
YNYKLPDDFTGCVIAWNSNNLDSKVGGNYNLYRLFRKSNLKPFERDISTERIYQAGSTPC  
NGVEGFNCYFPLQSYGFQPTYGVGYQPYRVVLSFELLHAPATVCGPKKSTNLVKNKCVN  
FNFNGLTGTGVLTESNKKFLPFQQFGRDIDDDTTDAVRDPQTEILDITPCSFGGVSVITP  
GTNTSNQVAVLYQGVNCTEVPVAIHADQLTPTWRVYSTGSNVFQTRAGCLIGAEHVNSY  
ECDIPIGAGICASYQTQTNSHRRARVASQSI IAYTMSLGAENSVAYSNNSIAIPINFTI  
SVTTEILPVSMTKTSVDCTMYICGDSTECNLLLQYGSFCTQLNRALTGIAVEQDKNTQE  
VFAQVKQIYKTPPIKDFGGFNFSQILPDPSKPSKRSFIEDLLFNKVTLADAGFIKQYGDC

LGDIAARDLICAQKFNGLTVLPPLLTDEMIAQYTSALLAGTITSGWTFGAGAALQIPFAM  
QMA YRFNGIGVTONVLYENQKLIANQFN SAIGKIQDSLSTASALGKLQDVVNQNAQALN  
TLVKQLSSNFGAISSVLNDILARLDKVEAEVQIDRLITGRLQSLQTYVTQQLIRAAEIRA  
SANLAATKMSECVLGQSKRVDFCGKGYHLSFPPQSAPHGVVFLHVTYVPAQEKNFTTAPA  
ICHGKAHFPREGVFVSNGTHWFVTQRNFYEPQIITHTNTFVSGNCDVVI GIVNNTVYDP  
LQPELDSFKEELDKYFKNHTSPDVLGDISGINASVVNIQKEIDRLNEVAKNLNESLIDL  
QELGKYEQYIKWPWYIWLGFIAGLIAIVMVTIMLCCMTSCCSCLKGCCSCGSCCKFDEDD  
SEPV LKGVKLHYT

>lcl|MZ434515.1\_prot\_QWX06459.1\_3 [gene=S] [protein=surface glycoprotein]  
[protein\_id=QWX06459.1] [location=21512..25324] [gbkey=CDS]  
MFVFLVLLPLVSSQCVNLTTRTQLPPAYTNSFTRGVYYPDKVFRSSVLHSTQDLFLPFFS  
NVTWFHAI--SGTNGTKRFDNPVLPFNDGVYFAS TEKSNIIRGWIFGTTLDSKTQSL LIV  
NNATNVVIKVECFQFCNDPFLGV-YHKNNKSWMESEFRVYSSANNCTFEYVSQPF LMDLE  
GKQGNFKNLREFVFKNIDGYFKIYSKHTPINLVRDLPQGFSALEPLVDLPIGINITRFQT  
LLALHRSYLTPGDSSSGWTAGAAAYVGYLQPRTFLLKYNENGTITDAVDCALDPLSETK  
CTLKSFTVEKGIYQTSNFRVQPTESIVRFPNITNLCPFGEVFNATRFASVYAWNRRKRISN  
CVADYSVLVNSASFSTFKCYGVSPTKLNLDLCFTNVYADSFVIRGDEV RQIAPGQTGKIAD  
YNYKLPDDFTGCVIAWNSNNLDSKVGGNYNLYRLFRKSNLKPFERDI STEIYQAGSTPC  
NGVEGFNCYFPLQSYGFQPTYGVGYQPYRVVLSFELLHAPATVCGPKKSTNLVKNKCVN  
FNFNGLTGTGVLTESNKKFLPFQQFGRDIDDDTTDAVRDPQTLEILDITPCSFGGVS VITP  
GTNTSNQVAVLYQGVNCTEVPVAIHADQLTPTWRVYSTG SNVFQTRAGCLIGAEHVNN SY  
ECDIPIGAGICASYQTQTNSHRRARSVASQSI IAYTMSLGAENSVAYSNN SIAIPNFTI  
SVTTEILPVSMTKTSVDCTMYICGDSTEC SNLLLQYGSFCTQLNRALTGIAVEQDKNTQE  
VFAQVKQIYKTPPIKDFGGFNFSQILPDPSKPSKRSFIEDLLFNKVTLADAGFIKQY GDC  
LGDIAARDLICAQKFNGLTVLPPLLTDEMIAQYTSALLAGTITSGWTFGAGAALQIPFAM  
QMA YRFNGIGVTONVLYENQKLIANQFN SAIGKIQDSLSTASALGKLQDVVNQNAQALN  
TLVKQLSSNFGAISSVLNDILARLDKVEAEVQIDRLITGRLQSLQTYVTQQLIRAAEIRA  
SANLAATKMSECVLGQSKRVDFCGKGYHLSFPPQSAPHGVVFLHVTYVPAQEKNFTTAPA  
ICHGKAHFPREGVFVSNGTHWFVTQRNFYEPQIITHTNTFVSGNCDVVI GIVNNTVYDP  
LQPELDSFKEELDKYFKNHTSPDVLGDISGINASVVNIQKEIDRLNEVAKNLNESLIDL  
QELGKYEQYIKWPWYIWLGFIAGLIAIVMVTIMLCCMTSCCSCLKGCCSCGSCCKFDEDD  
SEPV LKGVKLHYT

>lcl|MW750027.1\_prot\_QSX91521.1\_3 [gene=S] [protein=surface glycoprotein]  
[protein\_id=QSX91521.1] [location=21549..25370] [gbkey=CDS]  
MFVFFVLLPLVSSQCVNLTTRTQLPPAYTNSFTRGVYYPDKVFRSSVLHSTQDLFLPFFS  
NVTWFHAIHVS GTNGTKRFDNPVLPFNDGVYFASIEKSNIIRGWIFGTTLDSKTQSL LIV  
NNATNVVIKVECFQFCNDPFLGVYHKNKSWMESEFRVYSSANNCTFEYVSQPF LMDLE  
GKQGNFKNLREFVFKNIDGYFKIYSKHTPINLVRDLPQGFSALEPLVDLPIGINITRFQT  
LLALHRSYLTPGDSSSGWTAGAAAYVGYLQPRTFLLKYNENGTITDAVDCALDPLSETK  
CTLKSFTVEKGIYQTSNFRVQPTESIVRFPNITNLCPFGEVFNATRFASVYAWNRRKRISN  
CVADYSVLVNSASFSTFKCYGVSPTKLNLDLCFTNVYADSFVIRGDEV RQIAPGQTGKIAD  
YNYKLPDDFTGCVIAWNSNNLDSKVGGNYNLYRLFRKSNLKPFERDI STEIYQAGSTPC  
NGVKGFNCYFPLQSYGFQPTNGVGYQPYRVVLSFELLHAPATVCGPKKSTNLVKNKCVN  
FNFNGLTGTGVLTESNKKFLPFQQFGRDIADTTDAVRDPQTLEILDITPCSFGGVS VITP  
GTNTSNQVAVLYQGVNCTEVPVAIHADQLTPTWRVYSTG SNVFQTRAGCLIGAEYVNN SY  
ECDIPIGAGICASYQTQTNSPRRARSVASQSI IAYTMSLGAENSVAYSNN SIAIPNFTI  
SVTTEILPVSMTKTSVDCTMYICGDSTEC SNLLLQYGSFCTQLNRALTGIAVEQDKNTQE  
VFAQVKQIYKTPPIKDFGGFNFSQILPDPSKPSKRSFIEDLLFNKVTLADAGFIKQY GDC  
LGDIAARDLICAQKFNGLTVLPPLLTDEMIAQYTSALLAGTITSGWTFGAGAALQIPFAM  
QMA YRFNGIGVTONVLYENQKLIANQFN SAIGKIQDSLSTASALGKLQDVVNQNAQALN  
TLVKQLSSNFGAISSVLNDILSRLDKVEAEVQIDRLITGRLQSLQTYVTQQLIRAAEIRA  
SANLAAIKMSECVLGQSKRVDFCGKGYHLSFPPQSAPHGVVFLHVTYVPAQEKNFTTAPA  
ICHGKAHFPREGVFVSNGTHWFVTQRNFYEPQIITDNTFVSGNCDVVI GIVNNTVYDP  
LQPELDSFKEELDKYFKNHTSPDVLGDISGINASVVNIQKEIDRLNEVAKNLNESLIDL  
QELGKYEQYIKWPWYIWLGFIAGLIAIVMVTIMLCCMTSCCSCLKGCCSCGSCCKFDEDD  
SEPV LKGVKLHYT

>lcl|MW750080.1\_prot\_QSX92155.1\_3 [gene=S] [protein=surface glycoprotein]  
[protein\_id=QSX92155.1] [location=21497..25318] [gbkey=CDS]

MFVFFVLLPLVSSQCVNLTTRTQLPPAYTNSFTRGVYYPDKVFRSSVLHSTQDLFLPFFS  
NVTWFHAIHVSNGTNGTKRFDNPVLPFNDGVYFASIEKSNIIRGWIFGTTLDSKTQSLLIV  
NNATNVVIKVFCEFCNDPFLGVYHKNKSWMESEFRVYSSANNCTFEYVSQPFMDLE  
GKQGNFKNLREFVFKNIDGYFKIYSKHTPINLVRDLPOGFSALEPLVDLPIGINITRFQT  
LLALHRSYLT PGDSSSGWTAGAAAYVGYLQPRTFLLKYNENGTITDAVDCALDPLSETK  
CTLKSFTVEKGIYQTSNFRVQPTESIVRFPNITNLCPFGEVFNATRFASVYAWNRRKRISN  
CVADYSVLVNSASFSTFKCYGVSPTKLNLDLFCFTNVYADSFVIRGDEVRQIAPGQTGKIAD  
YNYKLPDDFTGCVIAWNSNNLDSKVGGNYNLYRLFRKSNLKPFERDISTERIYQAGSTPC  
NGVKGFNCYFPLQSYGFQPTNGVGYQPYRVVLSFELLHAPATVCGPKKSTNLVKNKCVN  
FNFNGLTGTGVLTESNKKFLPFQQFGRDIADTTDAVRDPQTEILDITPCSFGGVSVITP  
GTNTSNQVAVLYQGVNCTEVPVAIHADQLTPTWRVYSTGNSNVFQTRAGCLIGAEYVNSY  
ECDIPIGAGICASYQTQTNPRRARSVASQSI IAYTMSLGAENSVAYSNNIAIPTNFTI  
SVTTEILPVSMTKTSVDCTMYICGDSTECNLLLQYGSFCTQLNRALTGIAVEQDKNTQE  
VFAQVKQIYKTPPIKDFGGFNFSQILPDPSKPSKRSFIEDLLFNKVTLADAGFIKQYGDC  
LGDIAARDLICAQKFNGLTVLPPLLTDEMIAQYTSALLAGTITSGWTFGAGAALQIPFAM  
QMAYRFNGIGVTQNVLYENQKLIANQFNSAIGKIQDSLSTASALGKLQDVVNQNAQALN  
TLVKQLSSNFGAISSVLNDILSRLDKVEAEVQIDRLITGRLQSLQTYVTQQILIRAAEIRA  
SANLAAIKMSECVLQSKRVDFCGKGYHLSMFPQSAPHGVVFLHVTYVPAQEKNFTTAPA  
ICHGKAHFPREGVFSNGTHWFVTQRNFYEPQIITDNTFVSGNCDVVI GIVNNTVYDP  
LQPELDSFKEELDKYFKNHTSPDVLGDISGINASVVNIQKEIDRLNEVAKNLNESLIDL  
QELGKYEQYIKWPWYIWLGFIAGLIAIVMVTIMLCCMTSCCCLKGCCSCGSCCKFDEDD  
SEPVKGVKHLHYT

>lcl|MW891208.1\_prot\_QTP82767.1\_3 [gene=S] [protein=surface glycoprotein]  
[protein\_id=QTP82767.1] [location=21524..25345] [gbkey=CDS]

MFVFFVLLPLVSSQCVNLTTRTQLPPAYTNSFTRGVYYPDKVFRSSVLHSTQDLFLPFFS  
NVTWFHAIHVSNGTNGTKRFDNPVLPFNDGVYFASIEKSNIIRGWIFGTTLDSKTQSLLIV  
NNATNVVIKVFCEFCNDPFLGVYHKNKSWMESEFRVYSSANNCTFEYVSQPFMDLE  
GKQGNFKNLREFVFKNIDGYFKIYSKHTPINLVRDLPOGFSALEPLVDLPIGINITRFQT  
LLALHRSYLT PGDSSSGWTAGAAAYVGYLQPRTFLLKYNENGTITDAVDCALDPLSETK  
CTLKSFTVEKGIYQTSNFRVQPTESIVRFPNITNLCPFGEVFNATRFASVYAWNRRKRISN  
CVADYSVLVNSASFSTFKCYGVSPTKLNLDLFCFTNVYADSFVIRGDEVRQIAPGQTGKIAD  
YNYKLPDDFTGCVIAWNSNNLDSKVGGNYNLYRLFRKSNLKPFERDISTERIYQAGSTPC  
NGVKGFNCYFPLQSYGFQPTNGVGYQPYRVVLSFELLHAPATVCGPKKSTNLVKNKCVN  
FNFNGLTGTGVLTESNKKFLPFQQFGRDIADTTDAVRDPQTEILDITPCSFGGVSVITP  
GTNTSNQVAVLYQGVNCTEVPVAIHADQLTPTWRVYSTGNSNVFQTRAGCLIGAEYVNSY  
ECDIPIGAGICASYQTQTNPRRARSVASQSI IAYTMSLGAENSVAYSNNIAIPTNFTI  
SVTTEILPVSMTKTSVDCTMYICGDSTECNLLLQYGSFCTQLNRALTGIAVEQDKNTQE  
VFAQVKQIYKTPPIKDFGGFNFSQILPDPSKPSKRSFIEDLLFNKVTLADAGFIKQYGDC  
LGDIAARDLICAQKFNGLTVLPPLLTDEMIAQYTSALLAGTITSGWTFGAGAALQIPFAM  
QMAYRFNGIGVTQNVLYENQKLIANQFNSAIGKIQDSLSTASALGKLQDVVNQNAQALN  
TLVKQLSSNFGAISSVLNDILSRLDKVEAEVQIDRLITGRLQSLQTYVTQQILIRAAEIRA  
SANLAAIKMSECVLQSKRVDFCGKGYHLSMFPQSAPHGVVFLHVTYVPAQEKNFTTAPA  
ICHGKAHFPREGVFSNGTHWFVTQRNFYEPQIITDNTFVSGNCDVVI GIVNNTVYDP  
LQPELDSFKEELDKYFKNHTSPDVLGDISGINASVVNIQKEIDRLNEVAKNLNESLIDL  
QELGKYEQYIKWPWYIWLGFIAGLIAIVMVTIMLCCMTSCCCLKGCCSCGSCCKFDEDD  
SEPVKGVKHLHYT

>lcl|MZ100817.1\_prot\_QUS75326.1\_3 [gene=S] [protein=surface glycoprotein]  
[protein\_id=QUS75326.1] [location=21524..25345] [gbkey=CDS]

MFVFFVLLPLVSSQCVNLTTRTQLPPAYTNSFTRGVYYPDKVFRSSVLHSTQDLFLPFFS  
NVTWFHAIHVSNGTNGTKRFDNPVLPFNDGVYFASIEKSNIIRGWIFGTTLDSKTQSLLIV  
NNATNVVIKVFCEFCNDPFLGVYHKNKSWMESEFRVYSSANNCTFEYVSQPFMDLE  
GKQGNFKNLREFVFKNIDGYFKIYSKHTPINLVRDLPOGFSALEPLVDLPIGINITRFQT  
LLALHRSYLT PGDSSSGWTAGAAAYVGYLQPRTFLLKYNENGTITDAVDCALDPLSETK  
CTLKSFTVEKGIYQTSNFRVQPTESIVRFPNITNLCPFGEVFNATRFASVYAWNRRKRISN  
CVADYSVLVNSASFSTFKCYGVSPTKLNLDLFCFTNVYADSFVIRGDEVRQIAPGQTGKIAD  
YNYKLPDDFTGCVIAWNSNNLDSKVGGNYNLYRLFRKSNLKPFERDISTERIYQAGSTPC  
NGVKGFNCYFPLQSYGFQPTNGVGYQPYRVVLSFELLHAPATVCGPKKSTNLVKNKCVN  
FNFNGLTGTGVLTESNKKFLPFQQFGRDIADTTDAVRDPQTEILDITPCSFGGVSVITP

GTNTSNQVAVLYQGVNCTEVPVAIHADQLTPTWRVYSTGSNVFQTRAGCLIGAEYVNNNSY  
ECDIPIGAGICASYQTQTNSPRRARSVASQSI IAYTMSLGAENSVAYSNNNSIAIPTNFTI  
SVTTEILPVSMKTSTVDCTMYICGDSTECNSLLLQYGSFCTQLNRALTGIAVEQDKNTQE  
VFAQVKQIYKTPPIKDFGGFNFSQILPDPSKPSKRSFIEDLLFNKVTLADAGFIKQYGDC  
LGDIAARDLICAQKFNGLTVLPPLLTDEMIAQYTSALLAGTITSGWTFGAGAALQIPFAM  
QMAYRFNGIGVTONVLYENQKLIANQFNSAIGKIQDSLSTASALGKLQDVVNQNAQALN  
TLVKQLSSNFGAISSVLNDILSRDKVEAEVQIDRLITGRLQSLQTYVTQQLIRAAEIRA  
SANLAAIKMSECVLQSKRVDFCGKGYHLMSFPQSAPHGVVFLHVTVYVPAQEKNFTTAPA  
ICHGKAHFPREGVFSNGTHWFVTQRNFYEPQIITDNTFVSGNCDVVI GIVNNTVYDP  
LQPELDSFKEELDKYFKNHTSPDVLGDISGINASVVNIQKEIDRLNEVAKNLNESLIDL  
QELGKYEQYIKWPWYIWLGFIAGLIAIVMVTIMLCCMTSCCSCCLKGCCSCGSCCKFDEDD  
SEPVKGVKHLHYT

>lcl|MZ323773.1\_prot\_QWB90502.1\_3 [gene=S] [protein=surface glycoprotein]  
[protein\_id=QWB90502.1] [location=21516..25337] [gbkey=CDS]  
MFVFFVLLPLVSSQCVNLTTRTQLPPAYTNSFTRGVYYPDKVFRSSVLHSTQDLFLPFFS  
NVTWFHAIHVSGTNGTKRFDNPVLPFNDGVYFASIEKSNIRGWIFGTTLDSTQSLLV  
NNATNVVIKVECFQFCNDPFLGVYHKNKSWMESEFRVYSSANNCTFEYVSQPFMLDLE  
GKQGNFNKLRFEVFKNIDGYFKIYSKHTPINLVRDLPQGFSALEPLVDLPIGINITRFQT  
LLALHRSYLTPGDSSSGWTAGAAAYVGYLQPRTFLLKYNENGTITDAVDCALDPLSETK  
CTLKSFTVEKGIYQTSNFRVQPTESIVRFPNITNLCPFGEVFNATRFASVYAWNRRKRISN  
CVADYSVLVNSASFSTFKCYGVSPTKLNLDLCFTNVYADS FVIRGDEVQRQIAPGQTGKIAD  
YNYKLPDDFTGCVIAWNSNNLDSKVGGNYNLYRLFRKSNLKPFERDISTERIYQAGSTPC  
NGVKGFNCYFPLQSYGFQPTNGVGYQPYRVVLSFELLHAPATVCGPKKSTNLVKNKCVN  
FNFNGLTGTGVLTESNKKFLPFQFGRDIADTTDAVRDPQTEILDITPCSFGGVSVITP  
GTNTSNQVAVLYQGVNCTEVPVAIHADQLTPTWRVYSTGSNVFQTRAGCLIGAEYVNNNSY  
ECDIPIGAGICASYQTQTNSPRRARSVASQSI IAYTMSLGAENSVAYSNNNSIAIPTNFTI  
SVTTEILPVSMKTSTVDCTMYICGDSTECNSLLLQYGSFCTQLNRALTGIAVEQDKNTQE  
VFAQVKQIYKTPPIKDFGGFNFSQILPDPSKPSKRSFIEDLLFNKVTLADAGFIKQYGDC  
LGDIAARDLICAQKFNGLTVLPPLLTDEMIAQYTSALLAGTITSGWTFGAGAALQIPFAM  
QMAYRFNGIGVTONVLYENQKLIANQFNSAIGKIQDSLSTASALGKLQDVVNQNAQALN  
TLVKQLSSNFGAISSVLNDILSRDKVEAEVQIDRLITGRLQSLQTYVTQQLIRAAEIRA  
SANLAAIKMSECVLQSKRVDFCGKGYHLMSFPQSAPHGVVFLHVTVYVPAQEKNFTTAPA  
ICHGKAHFPREGVFSNGTHWFVTQRNFYEPQIITDNTFVSGNCDVVI GIVNNTVYDP  
LQPELDSFKEELDKYFKNHTSPDVLGDISGINASVVNIQKEIDRLNEVAKNLNESLIDL  
QELGKYEQYIKWPWYIWLGFIAGLIAIVMVTIMLCCMTSCCSCCLKGCCSCGSCCKFDEDD  
SEPVKGVKHLHYT

>lcl|MZ415787.1\_prot\_QWU67680.1\_3 [gene=S] [protein=surface glycoprotein]  
[protein\_id=QWU67680.1] [location=21524..25345] [gbkey=CDS]  
MFVFFVLLPLVSSQCVNLTTRTQLPPAYTNSFTRGVYYPDKVFRSSVLHSTQDLFLPFFS  
NVTWFHAIHVSGTNGTKRFDNPVLPFNDGVYFASIEKSNIRGWIFGTTLDSTQSLLV  
NNATNVVIKVECFQFCNDPFLGVYHKNKSWMESEFRVYSSANNCTFEYVSQPFMLDLE  
GKQGNFNKLRFEVFKNIDGYFKIYSKHTPINLVRDLPQGFSALEPLVDLPIGINITRFQT  
LLALHRSYLTPGGSSSGWTAGAAAYVGYLQPRTFLLKYNENGTITDAVDCALDPLSETK  
CTLKSFTVEKGIYQTSNFRVQPTESIVRFPNITNLCPFGEVFNATRFASVYAWNRRKRISN  
CVADYSVLVNSASFSTFKCYGVSPTKLNLDLCFTNVYADS FVIRGDEVQRQIAPGQTGKIAD  
YNYKLPDDFTGCVIAWNSNNLDSKVGGNYNLYRLFRKSNLKPFERDISTERIYQAGSTPC  
NGVKGFNCYFPLQSYGFQPTNGVGYQPYRVVLSFELLHAPATVCGPKKSTNLVKNKCVN  
FNFNGLTGTGVLTESNKKFLPFQFGRDIADTTDAVRDPQTEILDITPCSFGGVSVITP  
GTNTSNQVAVLYQGVNCTEVPVAIHADQLTPTWRVYSTGSNVFQTRAGCLIGAEVNNNSY  
ECDIPIGAGICASYQTQTNSPRRARSVASQSI IAYTMSLGVENSVAYSNNNSIAIPTNFTI  
SVTTEILPVSMKTSTVDCTMYICGDSTECNSLLLQYGSFCTQLNRALTGIAVEQDKNTQE  
VFAQVKQIYKTPPIKDFGGFNFSQILPDPSKPSKRSFIEDLLFNKVTLADAGFIKQYGDC  
LGDIAARDLICAQKFNGLTVLPPLLTDEMIAQYTSALLAGTITSGWTFGAGAALQIPFAM  
QMAYRFNGIGVTONVLYENQKLIANQFNSAIGKIQDSLSTASALGKLQDVVNQNAQALN  
TLVKQLSSNFGAISSVLNDILSRDKVEAEVQIDRLITGRLQSLQTYVTQQLIRAAEIRA  
SANLAATKMSECVLQSKRVDFCGKGYHLMSFPQSAPHGVVFLHVTVYVPAQEKNFTTAPA  
ICHGKAHFPREGVFSNGTHWFVTQRNFYEPQIITDNTFVSGNCDVVI GIVNNTVYDP  
LQPELDSFKEELDKYFKNHTSPDVLGDISGINASVVNIQKEIDRLNEVAKNLNESLIDL

QELGKYEQYIKWPWYIWLGFIAGLIAIVMVTIMLCCMTSCCSCLKGCCSCGSCCKFDEDD  
SEPVLLKGVKLHYT

>lcl|MZ540275.1\_prot\_QXL75598.1\_3 [gene=S] [protein=surface glycoprotein]  
[protein\_id=QXL75598.1] [location=21516..25334] [gbkey=CDS]  
MFVFLVLLPLVSSQCVNLTTRTQLPPAYTNSFTRGVYYPDKVFRSSVLHSTQDLFLPFFS  
NVTWFHAIHVSGTNGTKRFGNPVLPFNDGVYFASTEKSNIIRGWIFGTTLDSKTQSLLIV  
NNATNVVIKVCFFQFCNDPFLGV-YHKNNKSWMESESRVYSSANNCTFEYVSQPFLMDLE  
GKQGNFKNLREFVFKNIDGYFKIYSKHTPINLVRDLPQGFSALEPLVDLPIGINITRFQT  
LLALHRSYLTPGDSSSGWTAGAAAYVGYLQPRTFLLKYNENGTITDAVDCALDPLSETK  
CTLKSFTVEKGIYQTSNFRVQPTESIVRFPNITNLCPFGEVFNATRFASVYAWNRRKRISN  
CVADYSVLVNSASFSTFKCYGVSPTKLNLDLCFTNVYADSFVIRGDEVRQIAPGQTGKIAD  
YNYKLPDDFTGCVIAWNSNNLDSKVGNGYNYRYRLFRKSNLKPFERDISTEIQAGSTPC  
NGVEGFNCYFPLQSYGFQPTNGVGYQPYRVVLSFELLHAPATVCGPKKSTNLVKNKCVN  
FNFNGLTGTGVLTESNKKFLPFQFGRDIADTTDAVRDPQTLEILDITPCSFGGVSVITP  
GTNTSNQVAVLYQGVNCTEVPVAIHADQLTPTWRVYSTGNSNVFQTRAGCLIGAEHVNSY  
ECDIPIGAGICASYQTQTNSHRRARSVASQSI IAYTMSLGAENSVAYSNNIAIPTNFTI  
SVTTEILPVSMTKTSVDCTMYICGDSTECSNLLLQYGSFCTQLNRALTGIAVEQDKNTQE  
VFAQVKQIYKTPPIKDFGGFNFSQILPDPSKPSKRSFIEDLLFNKVTLADAGFIKQYGDC  
LGDIAARDLICAQKFNGLNVLPLLTDEMIAQYTSALLAGTITSGWTFGAGAALQIPFAM  
QMAYRFNGIGVTQNVLYENQKLIANQFNSAIGKIQDSLSTASALGKLQHVVNQNAQALN  
TLVKQLSSNFGAISSVLNDILSRLDKVEAEVQIDRLITGRLQSLQTYVTQQLIRAAEIRA  
SANLAATKMSECVLGQSKRVDFCGKGYHLMSPQSAPHGVVFLHVITYVPAQEKNFTTAPA  
ICHDKAHFPREGVFSNGTHWFVTQRNFYEPQIITDNTFVSGNCDVVI GIVNNTVYDP  
LQPELDSFKEELDKYFKNHTSPDVLGDISGINASVVNIQKEIDRLNEVAKNLNESLIDL  
QELGKYEQYIKWPWYIWLGFIAGLIAIVMVTIMLCCMTSCCSCLKGCCSCGSCCKFDEDD  
SEPVLLKGVKLHYT

>lcl|MZ554467.1\_prot\_QXN02789.1\_3 [gene=S] [protein=surface glycoprotein]  
[protein\_id=QXN02789.1] [location=21452..25270] [gbkey=CDS]  
MFVFLVLLPLVSSQCVNLTTRTQLPPAYTNSFTRGVYYPDKVFRSSVLHSTQDLFLPFFS  
NVTWFHAIHVSGTNGTKRFGNPVLPFNDGVYFASTEKSNIIRGWIFGTTLDSKTQSLLIV  
NNATNVVIKVCFFQFCNDPFLGV-YHKNNKSWMESESRVYSSANNCTFEYVSQPFLMDLE  
GKQGNFKNLREFVFKNIDGYFKIYSKHTPINLVRDLPQGFSALEPLVDLPIGINITRFQT  
LLALHRSYLTPGDSSSGWTAGAAAYVGYLQPRTFLLKYNENGTITDAVDCALDPLSETK  
CTLKSFTVEKGIYQTSNFRVQPTESIVRFPNITNLCPFGEVFNATRFASVYAWNRRKRISN  
CVADYSVLVNSASFSTFKCYGVSPTKLNLDLCFTNVYADSFVIRGDEVRQIAPGQTGKIAD  
YNYKLPDDFTGCVIAWNSNNLDSKVGNGYNYRYRLFRKSNLKPFERDISTEIQAGSTPC  
NGVEGFNCYFPLQSYGFQPTNGVGYQPYRVVLSFELLHAPATVCGPKKSTNLVKNKCVN  
FNFNGLTGTGVLTESNKKFLPFQFGRDIADTTDAVRDPQTLEILDITPCSFGGVSVITP  
GTNTSNQVAVLYQGVNCTEVPVAIHADQLTPTWRVYSTGNSNVFQTRAGCLIGAEHVNSY  
ECDIPIGAGICASYQTQTNSHRRARSVASQSI IAYTMSLGAENSVAYSNNIAIPTNFTI  
SVTTEILPVSMTKTSVDCTMYICGDSTECSNLLLQYGSFCTQLNRALTGIAVEQDKNTQE  
VFAQVKQIYKTPPIKDFGGFNFSQILPDPSKPSKRSFIEDLLFNKVTLADAGFIKQYGDC  
LGDIAARDLICAQKFNGLNVLPLLTDEMIAQYTSALLAGTITSGWTFGAGAALQIPFAM  
QMAYRFNGIGVTQNVLYENQKLIANQFNSAIGKIQDSLSTASALGKLQHVVNQNAQALN  
TLVKQLSSNFGAISSVLNDILSRLDKVEAEVQIDRLITGRLQSLQTYVTQQLIRAAEIRA  
SANLAATKMSECVLGQSKRVDFCGKGYHLMSPQSAPHGVVFLHVITYVPAQEKNFTTAPA  
ICHDKAHFPREGVFSNGTHWFVTQRNFYEPQIITDNTFVSGNCDVVI GIVNNTVYDP  
LQPELDSFKEELDKYFKNHTSPDVLGDISGINASVVNIQKEIDRLNEVAKNLNESLIDL  
QELGKYEQYIKWPWYIWLGFIAGLIAIVMVTIMLCCMTSCCSCLKGCCSCGSCCKFDEDD  
SEPVLLKGVKLHYT

>lcl|MZ413530.1\_prot\_QWU19600.1\_3 [gene=S] [protein=surface glycoprotein]  
[protein\_id=QWU19600.1] [location=21552..25370] [gbkey=CDS]  
MFVFLVLLPLVSSQCVNLTTRTQLPPAYTNSFTRGVYYPDKVFRSSVLHSTQDLFLPFFS  
NVTWFHAIHVSGTNGTKRFGNPVLPFNDGVYFASTEKSNIIRGWIFGTTLDSKTQSLLIV  
NNATNVVIKVCFFQFCNDPFLGV-YHKNNKSWMESESRVYSSANNCTFEYVSQPFLMDLE  
GKQGNFKNLREFVFKNIDGYFKIYSKHTPINLVRDLPQGFSALEPLVDLPIGINITRFQT  
LLALHRSYLTPGDSSSGWTAGAAAYVGYLQPRTFLLKYNENGTITDAVDCALDPLSETK  
CTLKSFTVEKGIYQTSNFRVQPTESIVRFPNITNLCPFGEVFNATRFASVYAWNRRKRISN



CVADYSVLVNSASFSTFKCYGVSPTKLNLDLCFTNVYADSFVIRGDEVQRQIAPGQTGKIAD  
YNYKLPDDFTGCVIAWNSNNLDSKVGGNYNRYRRLFRKSNLKPFFERDI STEIYQAGSTPC  
NGVEGFNCYFPLQSYGFQPTNGVGYQPYRVVLSFELLHAPATVCGPKKSTNLVKNKCVN  
FNFNGLTGTGVLTESNKKFLPFQQFGRDIADTTDAVRDPQTEILDITPCSFGGVSVITP  
GTNTSNQVAVLYQGVNCTEVPVAIHADQLTPTWRVYSTGNSVFQTRAGCLIGAHEVNNNSY  
ECDIPIGAGICASYQTQTNSPRRARSVASQSI IAYTMSLGAENSVAYSNNNSIAIPTNFTI  
SVTTEILPVSMTKTSVDCTMYICGDSTECNLLLQYGSFCTQLNRALTGIAVEQDKNTQE  
VFAQVKQIYKTPPIKDFGGFNFSQILPDPSKPSKRSFIEDLLFNKVTLADAGFIKQYGDC  
LGDIAARDLICAQKFNGLNVLPLLTDEMIAQYTSALLAGTITSGWTFGAGAALQIPFAM  
QMAYRFNGIGVTONVLYENQKLIANQFNSAIGKIQDSLSTASALGKLQHVVNQNAQALN  
TLVKQLSSNFGAISSVLNDILSRLDKVEAEVQIDRLITGRLQSLQTYVTQQLIRAAEIRA  
SANLAATKMSECVLQSKRVDFCGKGYHLSFPPQSAPHGVVFLHVTYVPAQEKNFTTAPA  
ICHGKAHFPREGVFSVNGTHWFVTQRNFYEPQIITDNTFVSGNCDVVI GIVNNTVYDP  
LQPELDSFKEELDKYFKNHTSPDVLGDISGINASVVNIQKEIDRLNEVAKNLNESLIDL  
QELGKYEQYIKWPWYIWLGFIAGLIAIVMVTIMLCCMTSCCSCLKGCCSCGSCCKFDEDD  
SEPVKGVKLYHT

>lcl|MZ416208.1\_prot\_QWU72725.1\_3 [gene=S] [protein=surface glycoprotein]

[protein\_id=QWU72725.1] [location=21522..25343] [gbkey=CDS]  
MFVFFVLLPLVSSQCVNLTTRTQLPPAYTNSFTRGVYYPDKVFRSSVLHSTQDLFLPFFS  
NVTWFHAIHVSGTNGTNRFDNPVLPFNDGVYFASIEKSNIRGWIFGTTLDSKTQSLIV  
NNATNVVIKVCFFQFCNDPFLGVYHKNKSWMESEFRVYSSANNCTFEYVSQPFMDLE  
GKQGNFKNLREFVFKNIDGYFKIYSKHTPINLVRDLPQGFSALEPLVDLPIGINITRFQT  
LLALHRSYLTGGSSSGWTAGAAAYVGYLQPRTFLLKYNENGTITDAVDCALDPLSETK  
CTLKSFTVEKGIYQTSNFRVQPTESIVRFPNITNLCPFGEVFNATRFASVYAWNRKRISN  
CVADYSVLVNSASFSTFKCYGVSPTKLNLDLCFTNVYADSFVIRGDEVQRQIAPGQTGKIAD  
YNYKLPDDFTGCVIAWNSNNLDSKVGGNYNLYRRLFRKSNLKPFFERDI STEIYQAGNTPC  
NGVEGFNCYFPLQSYGFQPTNGVGYQPYRVVLSFELLHAPATVCGPKKSTNLVKNKCVN  
FNFNGLTGTGVLTESNKKFLPFQQFGRDIADTTDAVRDPQTEILDITPCSFGGVSVITP  
GTNTSNQVAVLYQGVNCTEVPVAIHADQLTPTWRVYSTGNSVFQTRAGCLIGAHEVNNNSY  
ECDIPIGAGICASYQTQTNSPRRARSVASQSI IAYTMSLGAENSVAYSNNNSIAIPTNFTI  
SVTTEILPVSMTKTSVDCTMYICGDSTECNLLLQYGSFCTQLNRALTGIAVEQDKNTQE  
VFAQVKQIYKTPPIKDFGGFNFSQILPDPSKPSKRSFIEDLLFNKVTLADAGFIKQYGDC  
LGDIAARDLICAQKFNGLTVLPLLTDEMIAQYTSALLAGTITSGWTFGAGAALQIPFAM  
QMAYRFNGIGVTONVLYENQKLIANQFNSAIGKIQDSLSTASALGKLQDVVNQNAARALN  
TLVKQLSSNFGAISSVLNDILSRLDKVEAEVQIDRLITGRLQSLQTYVTQQLIRAAEIRA  
SANLAATKMSECVLQSKRVDFCGKGYHLSFPPQSAPHGVVFLHVTYVPAQEKNFTTAPA  
ICHGKAHFPREGVFSVNGTHWFVTQRNFYEPQIITDNTFVSGNCDVVI GIVNNTVYDP  
LQPELDSFKEELDKYFKNHTSPDVLGDISGINASVVNIQKEIDRLNEVAKNLNESLIDL  
QELGKYEQYIKWPWYIWLGFIAGLIAIVMVTIMLCCMTSCCSCLKGCCSCGSCCKFDEDD  
SEPVKGVKLYHT

>lcl|MZ414686.1\_prot\_QWU54540.1\_3 [gene=S] [protein=surface glycoprotein]

[protein\_id=QWU54540.1] [location=21560..25381] [gbkey=CDS]  
MFVFLVLLPLVSIQCVNLTTRTQLPPAYTNSFTRGVYYPDKVFRSSVLHSTQDLFLPFFS  
NVTWFHAIHVSGTNGTKRFDNPVLPFNDGVYFASIEKSNIRGWIFGTTLDSKTQSLIV  
NNATNVVIKVCFFQFCNDPFLGVYHKNKSCMESEFRVYSSANNCTFEYVSQPFMDLE  
GKQGNFKNLREFVFKNIDGYFKIYSKHTPINLVRDLPQGFSALEPLVDLPIGINITRFQT  
LLALHRSYLTGGSSSGWTAGAAAYVGYLQPRTFLLKYNENGTITDAVDCALDPLSETK  
CTLKSFTVEKGIYQTSNFRVQPTESIVRFPNITNLCPFGEVFNATRFASVYAWNRKRISN  
CVADYSVLVNSASFSTFKCYGVSPTKLNLDLCFTNVYADSFVIRGDEVQRQIAPGQTGKIAD  
YNYKLPDDFTGCVIAWNSNNLDSKVGGNYNRYRRLFRKSNLKPFFERDI STEIYQAGSTPC  
NGVEGFNCYFPLQSYGFQPTNGVGYQPYRVVLSFELLHAPATVCGPKKSTNLVKNKCVN  
FNFNGLTGTGVLTESNKKFLPFQQFGRDIADTTDAVRDPQTEILDITPCSFGGVSVITP  
GTNTSNQVAVLYQGVNCTEVPVAIHADQLTPTWRVYSTGNSVFQTRAGCLIGAHEVNNNSY  
ECDIPIGAGICASYQTQTNSPRRARSVASQSI IAYTMSLGAENSVAYSNNNSIAIPTNFTI  
SVTTEILPVSMTKTSVDCTMYICGDSTECNLLLQYGSFCTQLNRALTGIAVEQDKNTQE  
VFAQVKQIYKTPPIKDFGGFNFSQILPDPSKPSKRSFIEDLLFNKVTLADAGFIKQYGDC  
LGDIAARDLICAQKFNGLTVLPLLTDEMIAQYTSALLAGTITSGWTFGAGAALQIPFAM  
QMAYRFNGIGVTONVLYENQKLIANQFNSAIGKIQDSLSTASALGKLQDVVNQNAQALN

TLVKQLSSNFGAISSVLDILSRDKVEAEVQIDRLITGRLQSLQTYVTQQLIRAAEIRA  
SANLAATKMSECVLGGSKRVDFCGKGYHLSFPPQSAPHGVVFLHVTYVPAQEKNFTTAPA  
ICHGKAHFPREGVFSNGTHWFVTQRNFYEPQIITDNTFVSGNCDVVI GIVNNTVYDP  
LQPELDSFKEELDKYFKNHTSPDVDLGDISGINASVVNIQKEIDRLNEVAKNLNESLIDL  
QELGKYEQYIKWPWYIWLGFIAGLIAIAMVTIMLCCMTSCCSCLKGCCSCGSCCKFDEDD  
SEPVKGVKHLHYT

>lcl|MZ340544.1\_prot\_QWE52371.1\_3 [gene=S] [protein=surface glycoprotein]  
[protein\_id=QWE52371.1] [location=21513..25328] [gbkey=CDS]  
MFVFLVLLPLVSSQCVNLTTRTQLPPAYTNSFTRGVYYPDKVFRSSVLHSTQDLFLPFFS  
NVTWFHAIHVSNGTKRFDNPFVLPFNDGVYFASTEKSNIIRGWIFGTTLDSTQSLIV  
NNATNVVIKVFQFCNDPFLGVYHKNKSWMESG--VYSSANNCTFEYVSQPFMDLE  
GKQGNFKNLREFVFKNIDGYFKIYSKHTPINLVRDLDPQGFSALEPLVDLPIGINITRFQT  
LLALHRSYLTPGDSSSGWTAGAAAYVGYLQPRTFLLKYNENGTITDAVDCALDPLSETK  
CTLKSFTVEKGIYQTSNFRVQPTESIVRFPNITNLCPFGVFNATRFASVYAWNRRKRISN  
CVADYSVLVNSASFSTFKCYGVSPTKLNLDLFCFTNVYADSFVIRGDEVQRQIAPGQTGKIAD  
YNYKLPDDFTGCVIAWNSNNLDSKVGGNLYLYRLFRKSNLKPFERDISTERIYQAGSTPC  
NGVEGFNCYFPLQSYGFQPTNGVGYQPYRVVLSFELLHAPATVCGPKKSTNLVKNKCVN  
FNFENGLTGTGVLTESNKKFLPFQFGRDIADTTDAVRDPQTLEILDITPCSFGGVSVITP  
GTNTSNQVAVLYQGVNCTEVPVAIHADQLTPTWRVYSTGNSVFNQTRAGCLIGAEHVNSY  
ECDIPIGAGICASYQTQTSNPRRARSVASQSI IAYTMSLGAENSVAYSNNNSIAIPTNFTI  
SVTTEILPVSMTKTSVDCTMYICGDSTECNSLLLQYGSFCTQLNRALTGIAVEQDKNTQE  
VFAQVKQIYKTPPIKDFGGFNFSQILPDPSKPSKRSFIEDLLFNKVTLADAGFIKQYGDC  
LGDIAARDLICAQKFNGLTVLPPLTDEMIAQYTSALLAGTITSGWTFGAGAALQIPFAM  
QMAYRFNGIGVTONVLYENQKLIANQFNSAIGKIQDSLSTASALGKLQDVVNQNAQALN  
TLVKQLSSNFGAISSVLDILSRDKVEAEVQIDRLITGRLQSLQTYVTQQLIRAAEIRA  
SANLAATKMSECVLGGSKRVDFCGKGYHLSFPPQSAPHGVVFLHVTYVPAQEKNFTTAPA  
ICHGKAHFPREGVFSNGTHWFVTQRNFYEPQIITDNTFVSGNCDVVI GIVNNTVYDP  
LQPELDSFKEELDKYFKNHTSPDVDLGDISGINASVVNIQKEIDRLNEVAKNLNESLIDL  
QELGKYEQYIKWPWYIWLGFIAGLIAIAMVTIMLCCMTSCCSCLKGCCSCGSCCKFDEDD  
SEPVKGVKHLHYT

>lcl|MZ072282.1\_prot\_QUO86358.1\_3 [gene=S] [protein=surface glycoprotein]  
[protein\_id=QUO86358.1] [location=21509..25321] [gbkey=CDS]  
MFVFLVLLPLVSSQCVNLTTRTQLPPAYTNSFTRGVYYPDKVFRSSVLHSTQDLFLPFFS  
NVTWFHAI--SGTNGTKRFDNPFVLPFNDGVYFASTEKSNIIRGWIFGTTLDSTQSLIV  
NNATNVVIKVFQFCNDPFLGV-YHKNKSWMESEFRVYSSANNCTFEYVSQPFMDLE  
GKQGNFKNLREFVFKNIDGYFKIYSKHTPINLVRDLDPQGFSALEPLVDLPIGINITRFQT  
LLALHRSYLTPGDSSSGWTAGAAAYVGYLQPRTFLLKYNENGTITDAVDCALDPLSETK  
CTLKSFTVEKGIYQTSNFRVQPTESIVRFPNITNLCPFGVFNATRFASVYAWNRRKRISN  
CVADYSVLVNSASFSTFKCYGVSPTKLNLDLFCFTNVYADSFVIRGDEVQRQIAPGQTGKIAD  
YNYKLPDDFTGCVIAWNSNNLDSKVGGNLYLYRLFRKSNLKPFERDISTERIYQAGNTPC  
NGVEGFNCYFPLQSYGFQPTNGVGYQPYRVVLSFELLHAPATVCGPKKSTNLVKNKCVN  
FNFENGLTGTGVLTESNKKFLPFQFGRDIADTTDAVRDPQTLEILDITPCSFGGVSVITP  
GTNTSNQVAVLYQGVNCTEVPVAIHADQLTPTWRVYSTGNSVFNQTRAGCLIGAEHVNSY  
ECDIPIGAGICASYQTQTSNPRRARSVASQSI IAYTMSLGAENSVAYSNNNSIAIPTNFTI  
SVTTEILPVSMTKTSVDCTMYICGDSTECNSLLLQYGSFCTQLNRALTGIAVEQDKNTQE  
VFAQVKQIYKTPPIKDFGGFNFSQILPDPSKPSKRSFIEDLLFNKVTLADAGFIKQYGDC  
LGDIAARDLICAQKFNGLTVLPPLTDEMIAQYTSALLAGTITSGWTFGAGAALQIPFAM  
QMAYRFNGIGVTONVLYENQKLIANQFNSAIGKIQDSLSTASALGKLQDVVNQNAQALN  
TLVKQLSSNFGAISSVLDILSRDKVEAEVQIDRLITGRLQSLQTYVTQQLIRAAEIRA  
SANLAATKMSECVLGGSKRVDFCGKGYHLSFPPQSAPHGVVFLHVTYVPAQEKNFTTAPA  
ICHGKAHFPREGVFSNGTHWFVTQRNFYEPQIITHTNTFVSGNCDVVI GIVNNTVYDP  
LQPELDSFKEELDKYFKNHTSPDVDLGDISGINASVVNIQKEIDRLNEVAKNLNESLIDL  
QELGKYEQYIKWPWYIWLGFIAGLIAIAMVTIMLCCMTSCCSCLKGCCSCGSCCKFDEDD  
SEPVKGVKHLHYT

>lcl|MZ411803.1\_prot\_QWT97349.1\_3 [gene=S] [protein=surface glycoprotein]  
[protein\_id=QWT97349.1] [location=21331..25143] [gbkey=CDS]  
MFVFFVLLPLVSSQCVNLTTRTQLPPAYTNSFTRGVYYPDKVFRSSVLHSTQDLFLPFFS  
NVTWFHAI--SGTNGTKRFDNPFVLPFNDGVYFASTEKSNIIRGWIFGTTLDSTQSLIV

NNATNVVIKVCFEQFCNDPFLGV-YHKNNKSWMESEFRVYSSANNCTFEYVSQPFLMDLE  
GKQGNFKNLREFVFKNIDGYFKIYSKHTPINLVRDLPQGFSALEPLVDLPIGINITRFQT  
LLALHRSYLTGGSSSSGWTAGAAAAYVGYLQPRTFLLKYNENGTITDAVDCALDPLSETK  
CTLKSFTVEKGIYQTSNFRVQPTESIVRFPNITNLCPFGEVFNATRFASVYAWNRRKRISN  
CVADYSVLVNSASFSTFKCYGVSPTKLNLDLCFTNVYADSFVIRGDEVRQIAPGQTGKIAD  
YNYKLPDDFTGCVIAWNSNNLDSKVGGNYNLYRLFRKSNLKPFERDI STEIYQAGNTPC  
NGVEGFNCYFPLQSYGFQPTNGVGYQPYRVVLSFELLHAPATVCGPKKSTNLVKNKCVN  
FNFNGLTGTGVLTESNKKFLPFQQFGRDIADTTDAVRDPQTEILDITPCSFGGVSVITP  
GTNTSNQVAVLYQGVNCTEVPVAIHADQLTPTWRVYSTGSNVFQTRAGCLIGAEHVNSY  
ECDIPIGAGICASYQTQTNSHRRARVASQSI IAYTMSLGAENSVAYSNNNSIAI PTNFTI  
SVTTEILPVSMTKTSVDCTMYICGDSTECNNLLQYGSFCTQLNRALTGIAVEQDKNTQE  
VFAQVKQIYKTPPIKDFGGFNFSQILPDPSKPSKRSFIEDLLFNKVTLADAGFIKQYGDC  
LGDIAARDLICAQKFNGLTVLPPLLTDEMIAQYTSALLAGTITSGWTFGAGAALQIPFAM  
QMAYRFNGIGVTONVLYENQKLIANQFNSAIGKIQDSLSSTASALGKLQDVVNQNAQALN  
TLVKQLSSNFGAISSVLNDILSRLDKVEAEVQIDRLITGRLQSLQTYVTQQILIRAAEIRA  
SANLAATKMSECVLQSKRVDFCGKGYHLSFPPQSAPHGVVFLHVTVVPAQEKNF TTAPA  
ICHDGKAHFPREGVFSNGTHWFVTQRNFYEPQIITHTNTFVSGNCDVVI GIVNNTVYDP  
LQPELDSFKEELDKYFKNHTSPDVLGDISGINASVVNIQKEIDRLNEVAKNLNESLIDL  
QELGKYEQYIKWPWYIWLGFIAGLIAIVMVTIMLCCMTSCCCLKGCCSCGSCCKFDEDD  
SEPVLKGVKLHYT

>lcl|MZ372546.1\_prot\_QW065366.1\_3 [gene=S] [protein=surface glycoprotein]  
[protein\_id=QW065366.1] [location=21491..25303] [gbkey=CDS]  
MFVFLVLLPLVSSQCVNLRTRTQLPPAYTNSFTRGVYYPDKVFRSSVLHSTQDLFLPFFS  
NVTWFHAI--SGTNGTKRFDNPVLPFNDGVYFASTEKSNIIRGWIFGTTLDSKTQSLIIV  
NNATNVVIKVCFEQFCNDPFLGV-YHKNNKSWMESEFRVYSSANNCTFEYVSQPFLMDLE  
GKQGNFKNLREFVFKNIDGYFKIYSKHTPINLVRDLPQGFSALEPLVDLPIGINITRFQT  
LLALHRSYLTGGSSSSGWTAGAAAAYVGYLQPRTFLLKYNENGTITDAVDCALDPLSETK  
CTLKSFTVEKGIYQTSNFRVQPTESIVRFPNITNLCPFGEVFNATRFASVYAWNRRKRISN  
CVADYSVLVNSASFSTFKCYGVSPTKLNLDLCFTNVYADSFVIRGDEVRQIAPGQTGKIAD  
YNYKLPDDFTGCVIAWNSNNLDSKVGGNYNRYRLFRKSNLKPFERDI STEIYQAGSKPC  
NGVEGFNCYFPLQSYGFQPTNGVGYQPYRVVLSFELLHAPATVCGPKKSTNLVKNKCVN  
FNFNGLTGTGVLTESNKKFLPFQQFGRDIADTTDAVRDPQTEILDITPCSFGGVSVITP  
GTNTSNQVAVLYQGVNCTEVPVAIHADQLTPTWRVYSTGSNVFQTRAGCLIGAEHVNSY  
ECDIPIGAGICASYQTQTNSHRRARVASQSI IAYTMSLGAENSVAYSNNNSIAI PINFTI  
SVTTEILPVSMTKTSVDCTMYICGDSTECNNLLQYGSFCTQLNRALTGIAVEQDKNTQE  
VFAQVKQIYKTPPIKDFGGFNFSQILPDPSKPSKRSFIEDLLFNKVTLADAGFIKQYGDC  
LGDIAARDLICAQKFNGLTVLPPLLTDEMIAQYTSALLAGTITSGWTFGAGAALQIPFAM  
QMAYRFNGIGVTONVLYENQKLIANQFNSAIGKIQDSLSSTASALGKLQNVVNQNAQALN  
TLVKQLSSNFGAISSVLNDILSRLDKVEAEVQIDRLITGRLQSLQTYVTQQILIRAAEIRA  
SANLAATKMSECVLQSKRVDFCGKGYHLSFPPQSAPHGVVFLHVTVVPAQEKNF TTAPA  
ICHDGKAHFPREGVFSNGTHWFVTQRNFYEPQIITDNTFVSGNCDVVI GIVNNTVYDP  
LQPELDSFKEELDKYFKNHTSPDVLGDISGINASVVNIQKEIDRLNEVAKNLNESLIDL  
QELGKYEQYIKWPWYIWLGFIAGLIAIVMVTIMLCCMTSCCCLKGCCSCGSCCKFDEDD  
SEPVLKGVKLHYT

>lcl|MZ491783.1\_prot\_QXF91075.1\_3 [gene=S] [protein=surface glycoprotein]  
[protein\_id=QXF91075.1] [location=21509..25330] [gbkey=CDS]  
MFVFLVLLPLVSSQCVNLRTRTQLPPAYTNSFTRGVYYPDKVFRSSVLHSTQDLFLPFFS  
NVTWFHAIHVSMTNGTKRFDNPVLPFNDGVYFASTEKSNIIRGWIFGTTLDSKTQSLIIV  
NNATNVVIKVCFEQFCNDPFLGVSYHKNNKSWMESEFRVYSSANNCTFEYVSQPFLMDLE  
GKQGNFKNLREFVFKNIDGYFKIYSKHTPINLVRDLPQGFSALEPLVDLPIGINITRFQT  
LLALHRSYLTGGSSSSGWTAGAAAAYVGYLQPRTFLLKYNENGTITDAVDCALDPLSETK  
CTLKSFTVEKGIYQTSNFRVQPTESIVRFPNITNLCPFGEVFNATRFASVYAWNRRKRISN  
CVADYSVLVNSASFSTFKCYGVSPTKLNLDLCFTNVYADSFVIRGDEVRQIAPGQTGKIAD  
YNYKLPDDFTGCVIAWNSNNLDSKVGGNYNLYRLFRKSNLKPFERDI STEIYQAGSTPC  
NGVEGFNCYFPLQSYGFQPTYGVGYQPYRVVLSFELLHAPATVCGPKKSTNLVKNKCVN  
FNFNGLTGTGVLTESNKKFLPFQQFGRDIADTTDAVRDPQTEILDITPCSFGGVSVITP  
GTNTSNQVAVLYQGVNCTEVPVAIHADQLTPTWRVYSTGSNVFQTRAGCLIGAEHVNSY  
ECDIPIGAGICASYQTQTNSHRRARVASQSI IAYTMSLGAENSVAYSNNNSIAI PINFTI

SVTTEILPVSMTKTSVDCTMYICGDSTECNSNLLLQYGSFCTQLNRALTGIAVEQDKNTQE  
VFAQVKQIYKTPPIKDFGGFNFSQILPDPSKPSKRSFIEDLLFNKVTLADAGFIKQYGDC  
LGDIAARDLICAQKFNGLTVLPPLLTDEMIAQYTSALLAGTITSGWTFGAGAALQIPFAM  
QMAYRFNGIGVTONVLYENQKLIANQFNSAIGKIQDSLSTASALGKLQNVVNQNAQALN  
TLVKQLSSNFGAISSVLNDILSRLDKVEAEVQIDRLITGRLQSLQTYVTQQLIRAAEIRA  
SANLAATKMSECVLQSKRVDFCGKGYHLSFPPQSAPHGVVFLHVTVYVPAQEKNFTTAPA  
ICHGKAHFPREGVFNSTHWFVTRNFYEPQIITDNTFVSGNCDVVIIGIVNNTVYDP  
LQPELDSFKEELDKYFKNHTSPDVLGDISGINASVVNIQKEIDRLNEVAKNLNESLIDL  
QELGKYEQYIKWPWYIWLGFIAGLIAIVMVTIMLCCMTSCCSCLKGCCSCGSCCKFDEDD  
SEPVKGVKHLHYT

>lcl|MZ397911.1\_prot\_QWT29649.1\_3 [gene=S] [protein=surface glycoprotein]  
[protein\_id=QWT29649.1] [location=21513..25328] [gbkey=CDS]  
MFVFLVLLPLVSSQCVNLRTRTQLPPAYTNSFTRGVYYPDKVFRSSVLHSTQDLFLPFFS  
NVTWFHAIHVSNGTNGTKRFDNPVLPFNDGVYFASTEKSNIRGWIFGTTLDSTQSLIV  
NNATNVVIKVECFQFCNDPFLGVYHKNKSWMESG--VYSSANNCTFEYVSQPFMLDLE  
GKQGNFNKLRREFVFNIDGYFKIYSKHTPINLVRDLPQGFVLEPLVDLPIGINITRFQT  
LLALHRSYLTGPDSSSGWTAGAAAYVGYLQPRTFLLKYNENGTITDAVDCALDPLSETK  
CTLKSFTVEKGIYQTSNFRVQPTESIVRFPNITNLCPFGEVFNATRFASVYAWNRRKRISN  
CVADYSVLVNSASFSTFKCYGVSPTKLNLDLFCFTNVYADSFVIRGDEVROIAPGQTGKIAD  
YNYKLPDDFTGCVIAWNSNLDLSDKVGNYNYRYRLFRKSNLKPFERDISTEIQAGSKPC  
NGVEGFNCYFPLQSYGFQPTNGVGYQPYRVVLSFELLHAPATVCGPKKSTNLVKNKCVN  
FNFNGLTGTGVLTESNKKFLPFQFGRDIADTTDAVRDPQTEILDITPCSFGGVSVITP  
GTNTSNQVAVLYQGVNCTEVPVAIHADQLTPTWRVYSTGNSVFQTRAGCLIGAEHVNSY  
ECDIPIGAGICASYQTQTNPRRARSVASQSI IAYTMSLGAENSVAYSNNIAIPTNFTI  
SVTTEILPVSMTKTSVDCTMYICGDSTECNSNLLLQYGSFCTQLNRALTGIAVEQDKNTQE  
VFAQVKQIYKTPPIKDFGGFNFSQILPDPSKPSKRSFIEDLLFNKVTLADAGFIKQYGDC  
LGDIAARDLICAQKFNGLTVLPPLLTDEMIAQYTSALLAGTITSGWTFGAGAALQIPFAM  
QMAYRFNGIGVTONVLYENQKLIANQFNSAIGKIQDSLSTASALGKLQDVVNQNAQALN  
TLVKQLSSNFGAISSVLNDILSRLDKVEAEVQIDRLITGRLQSLQTYVTQQLIRAAEIRA  
SANLAATKMSECVLQSKRVDFCGKGYHLSFPPQSAPHGVVFLHVTVYVPAHEKNFTTAPA  
ICHGKAHFPREGVFNSTHWFVTRNFYEPQIITDNTFVSGNCDVVIIGIVNNTVYDP  
LQPELDSFKEELDKYFKNHTSPDVLGDISGINASVVNIQKEIDRLNEVAKNLNESLIDL  
QELGKYEQYIKWPWYIWLGFIAGLIAIVMVTIMLCCMTSCCSCLKGCCSCGSCCKFDEDD  
SEPVKGVKHLHYT

>lcl|MZ481924.1\_prot\_QXF28766.1\_3 [gene=S] [protein=surface glycoprotein]  
[protein\_id=QXF28766.1] [location=21509..25324] [gbkey=CDS]  
MFVFLVLLPLVSSQCVNLRTRTQLPPAYTNSFTRGVYYPDKVFRSSVLHSTQDLFLPFFS  
NVTWFHAIHVSNGTNGTKRFANPVLFPNDGVYFASTEKSNIRGWIFGTTLDSTQSLIV  
NNATNVVIKVECFQFCNDPFLGVYHKNKSWMESG--VYSSANNCTFEYVSQPFMLDLE  
GKQGNFNKLRREFVFNIDGYFKIYSKHTPINLVRDLPQGFSALEPLVDLPIGINITRFQT  
LLALHRSYLTGPDSSSGWTAGAAAYVGYLQPRTFLLKYNENGTITDAVDCALDPLSETK  
CTLKSFTVEKGIYQTSNFRVQPTESIVRFPNITNLCPFGEVFNATRFASVYAWNRRKRISN  
CVADYSVLVNSASFSTFKCYGVSPTKLNLDLFCFTNVYADSFVIRGDEVROIAPGQTGKIAD  
YNYKLPDDFTGCVIAWNSNLDLSDKVGNYNYRYRLFRKSNLKPFERDISTEIQAGSKPC  
NGVEGFNCYFPLQSYGFQPTNGVGYQPYRVVLSFELLHAPATVCGPKKSTNLVKNKCVN  
FNFNGLTGTGVLTESNKKFLPFQFGRDIADTTDAVRDPQTEILDITPCSFGGVSVITP  
GTNTSNQVAVLYQGVNCTEVPVAIHADQLTPTWRVYSTGNSVFQTRAGCLIGAEHVNSY  
ECDIPIGAGICASYQTQTNXRRARSVASQSI IAYTMSLGAENSVAYSNNIAIPTNFTI  
SVTTEILPVSMTKTSVDCTMYICGDSTECNSNLLLQYGSFCTQLNRALTGIAVEQDKNTQE  
VFAQVKQIYKTPPIKDFGGFNFSQILPDPSKPSKRSFIEDLLFNKVTLADAGFIKQYGDC  
LGDIAARDLICAQKFNGLTVLPPLLTDEMIAQYTSALLAGTITSGWTFGAGAALQIPFAM  
QMAYRFNGIGVTONVLYENQKLIANQFNSAIGKIQDSLSTASALGKLQXVVVNQNAQALN  
TLVKQLSSNFGAISSVLNDILSRLDKVEAEVQIDRLITGRLQSLQTYVTQQLIRAAEIRA  
SANLAATKMSECVLQSKRVDFCGKGYHLSFPPQSAPHGVVFLHVTVYVPAQEKNFTTAPA  
ICHGKAHFPREGVFNSTHWFVTRNFYEPQIITDNTFVSGNCDVVIIGIVNNTVYDP  
LQPELDSFKEELDKYFKNHTSPDVLGDISGINASVVNIQKEIDRLNEVAKNLNESLIDL  
QELGKYEQYIKWPWYIWLGFIAGLIAIVMVTIMLCCMTSCCSCLKGCCSCGSCCKFDEDD  
SEPVKGVKHLHYT

>lcl|MZ535061.1\_prot\_QXL25983.1\_3 [gene=S] [protein=surface glycoprotein]  
[protein\_id=QXL25983.1] [location=21509..25324] [gbkey=CDS]  
MFVFLVLLPLVSSQCVNLRTRTQLPPAYTNSFTRGVYYPDKVFRSSVLHSTQDLFLPFFS  
NVTWFHAIHVSNGTNGTKRFDNPVLPFNDGVYFASTEKSNIIRGWIFGTTLDSKTQSLIV  
NNATNVVIKVFCEFCNDPFLDVYYHKNKSWMESG--VYSSANNCTFEYVSQPFLMDLE  
GKQGNFKNLREFVFKNIDGYFKIYSKHTPINLVRDLPQGFSVLEPLVDLPIGINITRFQT  
LLALHRSYLTPGDSSSGWTAGAAAYVGYLQPRTFLLKYNENGTITDAVDCALDPLSETK  
CTLKSFTVEKGIYQTSNFRVQPTESIVRFPNITNLCPFGEVFNATRFASVYAWNRRKRISN  
CVADYSVLVNSASFSTFKCYGVSPTKLNLDLFCFTNVYADSFVIRGDEVRQIAPGQTGKIAD  
YNYKLPDDFTGCVIAWNSNNLDSKVGNGYNYRYRLFRKSNLKPFERDISTEIQAGSKPC  
NGVEGFNCYFPLQSYGFQPTNGVGYQPYRVVLSFELLHAPATVCGPKKSTNLVKNKCVN  
FNFENGLTGTGVLTESNKKFLPFQQFGRDIADTTDAVRDPQTLEILDITPCSFGGVSVITP  
GTNTSNQVAVLYQGVNCTEVPVAIHADQLTPTWRVYSTGNSNVFQTRAGCLIGAEHVNSY  
ECDIPIGAGICASYQTQTNRRRLARSVASQSI IAYTMSLGAENSVAYSNNIAIPTNFTI  
SVTTEILPVSMTKTSVDCTMYICGDSTECNSLLLQYGSFCTQLNRALTGIAVEQDKNTQE  
VFAQVKQIYKTPPIKDFGGFNFSQILPDPSKPSKRSFIEDLLFNKVTLADAGFIKQYGDC  
LGDIAARDLICAQKFNGLTVLPPLLTDEMIAQYTSALLAGTITSGWTFGAGAALQIPFAM  
QMAYRFNGIGVTQNVLYENQKLIANQFNSAIGKIQDSLSTASALGKLQNVVNQNAQALN  
TLVKQLSSNFGAISSVLNDILSRDLKVEAEVQIDRLITGRLQSLQTYVTQQILIRAAEIRA  
SANLAATKMSECVLQSKRVDFCGKGYHLMSPQSAPHGVVFLHVTYVPAQEKNFTTAPA  
ICHGKAHFPREGVFSNGTHWFVTQRNFYEPQIITDNTFVSGNCDVVIQVNVNTVYDP  
LQPELDSFKEELDKYFKNHTSPDVLGDISGINASVVNIQKEIDRLNEVANLNESLIDL  
QELGKYEQYIKWPWYIWLGFIAGLIAIVMVTIMLCCMTSCCCLKGCCSCGSCCKFDEDD  
SEPVLLKGVKLYHT

>lcl|MZ506335.1\_prot\_QXI80335.1\_3 [gene=S] [protein=surface glycoprotein]  
[protein\_id=QXI80335.1] [location=21531..25343] [gbkey=CDS]  
MFVFLVLLPLVSSQCVNLRTRTQLPPAYTNSFTRGVYYPDKVFRSSVLHSTQDLFLPFFS  
NVTWFHAIHVSNGTNGTKRFDNPVLPFNDGVYFASTEKSNIIRGWIFGTTLDSKTQSLIV  
NNATNVVIKVFCEFCNDPFLGVYYHKNKSWMESG--VYSSANNCTFEYVSQPFLMDLE  
GKQGNFKNLREFVFKNIDGYFKIYSKHTPINLVRDLPQGFSVLEPLVDLPIGINITRFQT  
LLALHRSYLTPGDSSSGWTAGAAAYVGYLQPRTFLLKYNENGTITDAVDCALDPLSETK  
CTLKSFTVEKGIYQTSNFRVQPTESIVRFPNITNLCPFGEVFNATRFASVYAWNRRKRISN  
CVADYSVLVNSASFSTFKCYGVSPTKLNLDLFCFTNVYADSFVIRGDEVRQIAPGQTGKIAD  
YNYKLPDDFTGCVIAWNSNNLDSKVGNGYNYRYRLFRKSNLKPFERDISTEIQAGSKPC  
NGVEGFNCYFPLQSYGFQPTNGVGYQPYRVVLSFELLHAPATVCGPKKSTNLVKNKCVN  
FNFENGLTGTGVLTESNKKFLPFQQFGRDIADTTDAVRDPQTLEILDITPCSFGGVSVITP  
GTNTSNQVAVLYQGVNCTEVPVAIHADQLTPTWRVYSTGNSNVFQTRAGCLIGAEHVNSY  
ECDIPIGAGICASYQTQ-TRRRARSVASQSI IAYTMSLGAENSVAYSNNIAIPTNFTI  
SVTTEILPVSMTKTSVDCTMYICGDSTECNSLLLQYGSFCTQLNRALTGIAVEQDKNTQE  
VFAQVKQIYKTPPIKDFGGFNFSQILPDPSKPSKRSFIEDLLFNKVTLADAGFIKQYGDC  
LGDIAARDLICAQKFNGLTVLPPLLTDEMIAQYTSALLAGTITSGWTFGAGAALQIPFAM  
QMAYRFNGIGVTQNVLYENQKLIANQFNSAIGKIQDSLSTASALGKLQNVVNQNAQALN  
TLVKQLSSNFGAISSVLNDILSRDLKVEAEVQIDRLITGRLQSLQTYVTQQILIRAAEIRA  
SANLAATKMSECVLQSKRVDFCGKGYHLMSPQSAPHGVVFLHVTYVPAQEKNFTTAPA  
ICHGKAHFPREGVFSNGTHWFVTQRNFYEPQIITDNTFVSGNCDVVIQVNVNTVYDP  
LQPELDSFKEELDKYFKNHTSPDVLGDISGINASVVNIQKEIDRLNEVAKNLNESLIDL  
QELGKYEQYIKWPWYIWLGFIAGLIAIVMVTIMLCCMTSCCCLKGCCSCGSCCKFDEDD  
SEPLLLKGVKLYHT

>lcl|MZ530427.1\_prot\_QXK74956.1\_3 [gene=S] [protein=surface glycoprotein]  
[protein\_id=QXK74956.1] [location=21509..25324] [gbkey=CDS]  
MFVFLVLLPLVSSQCVNLRTRTQLPPAYTNSFTRGVYYPDKVFRSSVLHSTQDLFLPFFS  
NVTWFHAIHVSNGTNGTKRFDNPVLPFNDGVYFASTEKSNIIRGWIFGTTLDSKTQSLIV  
NNATNVVIKVFCEFCNDPFLDVYYHKNKSWMESG--VYSSANNCTFEYVSQPFLMDLE  
GKQGNFKNLREFVFKNIDGYFKIYSKHTPINLVRDLPQGFSALEPLVDLPIGINITRFQT  
LLALHRSYLTPGDSSSGWTAGAAAYVGYLQPRTFLLKYNENGTITDAVDCALDPLSETK  
CTLKSFTVEKGIYQTSNFRVQPTESIVRFPNITNLCPFGEVFNATRFASVYAWNRRKRISN  
CVADYSVLVNSASFSTFKCYGVSPTKLNLDLFCFTNVYADSFVIRGDEVRQIAPGQTGKIAD  
YNYKLPDDFTGCVIAWNSNNLDSKVGNGYNYRYRLFRKSNLKPFERDISTEIQAGSKPC

NGVEGFNCYFPLQSYGFQPTNGVGYQPYRVVLSFELLHAPATVCGPKKSTNLVKNKCVN  
FNFNGLTGTGVLTESNKKFLPFQQFGRDIADTTDAVRDPQTEILDITPCSFGGVSVITP  
GTNTSNQVAVLYQGVNCTEVPVAIHADQLTPTWRVYSTGNSVFQTRAGCLIGAHEVNNNSY  
ECDIPIGAGICASYQTQTNRRRARSVASQFI IAYTMSLGAENSVAYSNNNSIAIPTNFTI  
SVTTEILPVSMKTSTVDCTMYICGDSTECNSLLLQYGSFCTQLNRALTGIAVEQDKNTQE  
VFAQVKQIYKTPPIKDFGGFNFSQILPDPSKPSKRSFIEDLLFNKVTLADAGFIKQYGDC  
LGDIAARDLICAQKFNGLTVLPPLLTDEMIAQYTSALLAGTITSGWTFGAGAALQIPFAM  
QMAYRFNGIGVTQNVLYENQKLIANQFNSAIGKIQDSLSTASALGKLQNVVNQNAQALN  
TLVKQLSSNFGAISSVLNDILSRLDKVEAEVQIDRLITGRLQSLQTYVTQQLIRAAEIRA  
SANLAATKMSECVLGQSKRVDFCGKGYHLMSFPQSAPHGVVFLHVTVYVPAQEKNFTTAPA  
ICHDGKAHFPREGVFSVNGTHWFVTQRNFYEPQIITDNTFVSGNCDVVIGIVNNTVYDP  
LQPELDSFKEELDKYFKNHTSPDVLGDISGINASVVNIQKEIDRLNEVAKNLNESLIDL  
QELGKYEQYIKWPWYIWLGFIAGLIAIVMVTIMLCCMTSCCSCLKGCCSCGSCCKFDEDD  
SEPVKGVKLYHT

>lcl|MZ342062.1\_prot\_QWE69748.1\_3 [gene=S] [protein=surface glycoprotein]  
[protein\_id=QWE69748.1] [location=21524..25339] [gbkey=CDS]  
MFVFLVLLPLVSSQCVNLRTRTQLPPAYTNSFTRGVYYPDKVFRSSVLHSTQDLFLPFFS  
NVTWFHAIHVSNGTNGTKRFDNPVLPFNDGVYFASTEKSNIRGWIFGTTLDLSDKTSQSLIV  
NNATNVVIKVECFQFCNDPFLDVYYHKNKSWMESG--VYSSANNCTFEYVSQPFMDLE  
GKQGNFKNLREFVFKNIDGYFKIYSKHTPINLVRDLPQGFSALEPLVDLPIGINITRFQT  
LLALHRSYLTPGDSSSGWTAGAAAYVGYLQPRTFLLKYNENGTITDAVDCALDPLSETK  
CTLKSFTVEKGIYQTSNFRVQPTESIVRFPNITNLCPFGEVFNATRFASVYAWNRRKRISN  
CVADYSVLVNSASFSTFKCYGVSPTKLNLDLCTNVYADS FVIRGDEVQRQIAPGQTGKIAD  
YNYKLPDDFTGCVIAWNSNNLDSKVGNYNYRYRLFRKSNLKPFERDISTEIQAGSKPC  
NGVEGFNCYFPLQSYGFQPTNGVGYQPYRVVLSFELLHAPATVCGPKKSTNLVKNKCVN  
FNFNGLTGTGVLTESNKKFLPFQQFGRDIADTTDAVRDPQTEILDITPCSFGGVSVITP  
GTNTSNQVAVLYQGVNCTEVPVAIHADQLTPTWRVYSTGNSVFQTRAGCLIGAHEVNNNSY  
ECDIPIGAGICASYQTQTNRRRARSVASQSI IAYTMSLGAENSVAYSNNNSIAIPTNFTI  
SVTTEILPVSMKTSTVDCTMYICGDSTECNSLLLQYGSFCTQLNRALTGIAVEQDKNTQE  
VFAQVKQIYKTPPIKDFGGFNFSQILPDPSKPSKRSFIEDLLFNKVTLADAGFIKQYGDC  
LGDIAARDLICAQKFNGLTVLPPLLTDEMIAQYTSALLAGTITSGWTFGAGAALQIPFAM  
QMAYRFNGIGVTQNVLYENQKLIANQFNSAIGKIQDSLSTASALGKLQNVVNQNAQALN  
TLVKQLSSNFGAISSVLNDILSRLDKVEAEVQIDRLITGRLQSLQTYVTQQLIRAAEIRA  
SANLAATKMSECVLGQSKRVDFCGKGYHLMSFPQSAPHGVVFLHVTVYVPAQEKNFTTAPA  
ICHDGKAHFPREGVFSVNGTHWFVTQRNFYEPQIITDNTFVSGNCDVVIGIVNNTVYDP  
LQPELDSFKEELDKYFKNHTSPDVLGDISGINASVVNIQKEIDRLNEVAKNLNESLIDL  
QELGKYEQYIKWPWYIWLGFIAGLIAIVMVTIMLCCMTSCCSCLKGCCSCGSCCKFDEDD  
SEPVKGVKLYHT

>lcl|MZ554372.1\_prot\_QXN01728.1\_3 [gene=S] [protein=surface glycoprotein]  
[protein\_id=QXN01728.1] [location=21524..25336] [gbkey=CDS]  
MFVFLVLLPLVSSQCVNLRTRTQLPPAYTNSFTRGVYYPDKVFRSSVLHSTQDLFLPFFS  
NVTWFHAIHVSNGTNGTKRFDNPVLPFNDGVYFASTEKSNIRGWIFGTTLDLSDKTSQSLIV  
NNATNVVIKVECFQFCNDPFLDVYYHKNKSWMESG--VYSSANNCTFEYVSQPFMDLE  
GKQGNFKNLREFVFKNIDGYFKIYSKHTPINLVRDLPQGFSALEPLVDLPIGINITRFQT  
LLALHRSYLTPGDSSSGWTAGAAAYVGYLQPRTFLLKYNENGTITDAVDCALDPLSETK  
CTLKSFTVEKGIYQTSNFRVQPTESIVRFPNITNLCPFGEVFNATRFASVYAWNRRKRISN  
CVADYSVLVNSASFSTFKCYGVSPTKLNLDLCTNVYADS FVIRGDEVQRQIAPGQTGKIAD  
YNYKLPDDFTGCVIAWNSNNLDSKVGNYNYRYRLFRKSNLKPFERDISTEIQAGSKPC  
NGVEGFNCYFPLQSYGFQPTNGVGYQPYRVVLSFELLHAPATVCGPKKSTNLVKNKCVN  
FNFNGLTGTGVLTESNKKFLPFQQFGRDIADTTDAVRDPQTEILDITPCSFGGVSVITP  
GTNTSNQVAVLYQGVNCTEVPVAIHADQLTPTWRVYSTGNSVFQTRAGCLIGAHEVNNNSY  
ECDIPIGAGICASYQTQTNRRRARSVASQSI IAYTMSLGAENSVAYSNNNSIAIPTNFTI  
SVTTEILPVSMKTSTVDCTMYICGDSTECNSLLLQYGSFCTQLNRALTGIAVEQDKNTQE  
VFAQVKQIYKTPPIKDFGGFNFSQILPDPSKPSKRSFIEDLLFNKVTLADAGFIKQYGDC  
LGDIAARDLICAQKFNGLTVLPPLLTDEMIAQYTSALLAGTITSGWTFGAGAALQIPFAM  
QMAYRFNGIGVTQNVLYENQKLIANQFNSAIGKIQDSLSTASALGKLQNVVNQNAQALN  
TLVKQLSSNFGAISSVLNDILSRLDKVEAEVQIDRLITGRLQSLQTYVTQQLIRAAEIRA  
SANLAATKMSECVLGQSKRVDFCGKGYHLMSFPQSAPHGVVFLHVTVYVPAQEKNFTTAPA

ICHGKAHFPPREGV FVSN GTHWFVTQRNFYEPQIIITDNTFVSGNCDVVIGIVNNTVYDP  
LQPELDSFKEELDKYFKNHTSPDVDLGDISGINASVVNIQKEIDRLNEVAKNLNESLIDL  
QELGKYEQYIKWPWYIWLGFIAGLIAIVMVTIMLCCMTSCCCLKGCCSCGSCCKFDEDD  
SEPV LKGVKLHYT

>lcl|MZ340535.1\_prot\_QWE52264.1\_3 [gene=S] [protein=surface glycoprotein]  
[protein\_id=QWE52264.1] [location=21513..25334] [gbkey=CDS]  
MFVFLVLLPLVSSQCVNLTTRTRLPPAYTNSFTRGVYYPDKVFRSSVLHSTQDLFLPFFS  
NVTWFHAIHVS GTNGTKRFDNPVLPFNDGVYFASTEKSNIIRGWIFGTTLDSKTQSL LIV  
NNATNVVIKVCFEQFCNDPFLDVYYHKNNKSWMESEFRVYSSANNCTFEYVSQPF LMDLE  
GKQGNFKNLREFVFKNIDGYFKIYSKHTPINLVRDLPQGFSALEPLVDLPIGINITRFQT  
LLALHRSYLTPGDSSSGWTAGAAAYVGYLQPRTFLLKYNENGTITDAVDCALDPLSETK  
CTLKSFTVEKGIYQTSNFRVQPTESIVRFPNITNLCPFGVEFNATRFASVYAWNRRKRISN  
CVADYSVLVNSASFSTFKCYGVSPTKLNLDLCFTNVYADSFVIRGDEV RQIAPGQTGKIAD  
YNYKLPDDFTGCVIAWNSNNLDSKVG GNYRYR LFRKSNLKP FERDISTEIQAGSKPC  
NGVEGFNCYFPLQSYGFQPTNGVGYQPYRVVLSFELLHAPATVCGPKKSTNLVKNKCVN  
FNFNGLTGTGVLTESNKKFLPFQGFGRDIADTTDAVRDPQTLEILDITPCSFGGVS VITP  
GTNTSNQVAVLYQGVNCTEVPVAIHADQLTPTWRVYSTG SNVFQTRAGCLIGAEHVNSY  
ECDIPIGAGICASYQTQTNSPRRARSVASQSI IAYTMSLGAENSVAYSNN SIAIPTNFTI  
SVTTEILPVSMTKTSVDCTMYICGDSTECSNLLLQYGSFCTQLNRALTGIAVEQDKNTQE  
VFAQVKQIYKTPPIKDFGGFNFSQILPDPSKPSKRSFIEDLLFNKVT LADAGFIKQY GDC  
LGDIAARDLICAQKFNGLTVLPPLLTDEMIAQYTSALLAGTITSGWTFGAGAALQIPFAM  
QMAYRFNGIGVTQNVLYENQKLIANQFN SAIGKIQDSL SASTASALGKLQNVVNQNAQALN  
TLVKQLSSNFGAISSVLNDILSR LDKVEAEVQIDRLITGRLQSLQTYVTQQLIRAAEIRA  
SANLAATKMSECVLGQSKRVDFCGKGYHLSFPPQSAPHGVVFLHVTYVPAQEKNFTTAPA  
ICHGKAHFPPREGV FVSN GTHWFVTQRNFYEPQIIITDNTFVSGNCDVVIGIVNNTVYDP  
LQPELDSFKEELDKYFKNHTSPDVDLGDISGINASVVNIQKEIDRLNEVAKNLNESLIDL  
QELGKYEQYIKWPWYIWLGFIAGLIAIVMVTIMLCCMTSCCCLKGCCSCGSCCKFDEDD  
SEPV LKGVKLHYT

>lcl|MZ325343.1\_prot\_QWC36323.1\_3 [gene=S] [protein=surface glycoprotein]  
[protein\_id=QWC36323.1] [location=21513..25328] [gbkey=CDS]  
MFVFLVLLPLVSSQCVNLTTRTRLPPAYTNSFTRGVYYPDKVFRSSVLHSTQDLFLPFFS  
NVTWFHAIHVS GTNGTKRFDNPVLPFNDGVYFASTEKSNIIRGWIFGTTLDSKTQSL LIV  
NNATNVVIKVCFEQFCNDPFLDVYYHKNNKSWMESG--VYSSANNCTFEYVSQPF LMDLE  
GKQGNFKNLREFVFKNIDGYFKIYSKHTPINLVRDLPQGF SVLEPLVDLPIGINITRFQT  
LLALHRSYLTPGDSSSGWTAGAAAYVGYLQPRTFLLKYNENGTITDAVDCALDPLSETK  
CTLKSFTVEKGIYQTSNFRVQPTESIVRFPNITNLCPFGVEFNATRFASVYAWNRRKRISN  
CVADYSVLVNSASFSTFKCYGVSPTKLNLDLCFTNVYADSFVIRGDEV RQIAPGQTGKIAD  
YNYKLPDDFTGCVIAWNSNNLDSKVG GNYRYR LFRKSNLKP FERDISTEIQAGSKPC  
NGVEGFNCYFPLQSYGFQPTNGVGYQPYRVVLSFELLHAPATVCGPKKSTNLVKNKCVN  
FNFNGLTGTGVLTESNKKFLPFQGFGRDIADTTDAVRDPQTLEILDITPCSFGGVS VITP  
GTNTSNQVAVLYQGVNCTEVPVAIHADQLTPTWRVYSTG SNVFQTRAGCLIGAEHVNSY  
ECDIPIGAGICASYQTQTNSPRRARSVASQSI IAYTMSLGAENSVAYSNN SIAIPTNFTI  
SVTTEILPVSMTKTSVDCTMYICGDSTECSNLLLQYGSFCTQLNRALTGIAVEQDKNTQE  
VFAQVKQIYKTPPIKDFGGFNFSQILPDPSKPSKRSFIEDLLFNKVT LADAGFIKQY GDC  
LGDIAARDLICAQKFNGLTVLPPLLTDEMIAQYTSALLAGTITSGWTFGAGAALQIPFAM  
QMAYRFNGIGVTQNVLYENQKLIANQFN SAIGKIQDSL SASTASALGKLQNVVNQNAQALN  
TLVKQLSSNFGAISSVLNDILSR LDKVEAEVQIDRLITGRLQSLQTYVTQQLIRAAEIRA  
SANLAATKMSECVLGQSKRVDFCGKGYHLSFPPQSAPHGVVFLHVTYVPAQEKNFTTAPA  
ICHGKAHFPPREGV FVSN GTHWFVTQRNFYEPQIIITDNTFVSGNCDVVIGIVNNTVYDP  
LQPELDSFKEELDKYFKNHTSPDVDLGDISGINASVVNIQKEIDRLNEVAKNLNESLIDL  
QELGKYEQYIKWPWYIWLGFIAGLIAIVMVTIMLCCMTSCCCLKGCCSCGSCCKFDEDD  
SEPV LKGVKLHYT

>lcl|MZ314937.1\_prot\_QWA53269.1\_3 [gene=S] [protein=surface glycoprotein]  
[protein\_id=QWA53269.1] [location=21513..25328] [gbkey=CDS]  
MFVFLVLLPLVSSQCVNLTTRTQLPPAYTNSFTRGVYYPDKVFRSSVLHSTQDLFLPFFS  
NVTWFHAIHVS GTNGTKRFDNPVLPFNDGVYFASTEKSNIIRGWIFGTTLDSKTQSL LIV  
NNATNVVIKVCFEQFCNDPFLDVYYHKNNKSWMESG--VYSSANNCTFEYVSQPF LMDLE  
GKQGNFKNLREFVFKNIDGYFKIYSKHTPINLVRDLPQGFSALEPLVDLPIGINITRFQT

LLALHRSYLTPGDSSSSGWTAGAAAYVGYLQPRTFLLKYNENGTITDAVDCALDPLSETK  
CTLKSFTVEKGIYQTSNFRVQPTESIVRFPNITNLCPFGEVFNATRFASVYAWNRRKRISN  
CVADYSVLVNSASFSTFKCYGVSPTKLNLDLCFTNVYADSFVIRGDEVRQIAPGQTGKIAD  
YNYKLPDDFTGCVIAWNSNNLDSKVGGNYNRYRRLFRKSNLKPFFERDI STEIYQAGSKPC  
NGVEGFNCYFPLQSYGFQPTNGVGYQPYRVVLSFELLHAPATVCGPKKSTNLVKNKCVN  
FNFNGLTGTGVLTESNKKFLPFQQFGRDIADTTDAVRDPQTEILDITPCSFGGVSVITP  
GTNTSNQVAVLYQGVNCTEVPVAIHADQLTPTWRVYSTGSNVFQTRAGCLIGAEHVNSY  
ECDIPIGAGICASYQTQTN SPRRARSVASQSI IAYTMSLGAENSVAYSNNSIAIPTNFTI  
SVTTEILPVSMTKTSVDCTMYICGDSTEC SNLLLQYGSFCTQLNRALTGIAVEQDKNTQE  
VFAQVKQIYKTPPIKDFGGFNFSQILPDPSKPSKRSFIEDLLFNKVTLADAGFIKQYGDC  
LGDIAARDLICAQKFNGLTVLPPLLTDEMIAQYTSALLAGTITSGWTFGAGAALQIPFAM  
QMAYRFNGIGVTONVLYENQKLIANQFN SAIGKIQDSLSTASALGKLQNVVNQNAQALN  
TLVKQLSSNFGAISSVLNDILSRLDKVEAEVQIDRLITGRLQSLQTYVTQQILIRAAEIRA  
SANLAATKMSECVLQSKRVDFCGKGYHLSFPPQSAPHGVVFLHVTVVPAQEKNF TTAPA  
ICHDGKAHFPREGV FVSNGTHWFVTQRNFYEPQIITDNTFVSGNCDVVI GIVNNTVYDP  
LQPELDSFKEELDKYFKNHTSPDVLGDISGINASVVNIQKEIDRLNEVAKNLNESLIDL  
QELGKYEQYIKWPWYIWLGFIAGLIAIVMVTIMLCCMTSCC SCLKGCCSCGSCCKFDEDD  
SEPV LKGVKLHYT

>lcl|MZ342588.1\_prot\_QWE75873.1\_3 [gene=S] [protein=surface glycoprotein]  
[protein\_id=QWE75873.1] [location=21513..25328] [gbkey=CDS]  
MFVFLVLLPLVSSQCVNLTTRTQLPPAYTNSFTRGVYYPDKVFRSSVLHSTQDLFLPFFS  
NVTWFHAIHVSGTNGTKRFDNPVLPFNDGVYFASTEKSNIIRGWIFGTTLD SKTQSL LIV  
NNATNVVIKVC EFQFCNDPFLDVYYHKNNKSWMESG--VYSSANNCTFEYVSQPF LMDLE  
GKQGNFKNLREFVFKNIDGYFKIYSKHTPINLVRDL PQGFSALEPLVDLP IGINITRFQT  
LLALHRSYLTPGDSSSSGWTAGAAAYVGYLQPRTFLLKYNENGTITDAVDCALDPLSETK  
CTLKSFTVEKGIYQTSNFRVQPTESIVRFPNITNLCPFGEVFNATRFASVYAWNRRKRISN  
CVADYSVLVNSASFSTFKCYGVSPTKLNLDLCFTNVYADSFVIRGDEVRQIAPGQTGKIAD  
YNYKLPDDFTGCVIAWNSNNLDSKVGGNYNRYRRLFRKSNLKPFFERDI STEIYQAGSKPC  
NGVEGFNCYFPLQSYGFQPTNGVGYQPYRVVLSFELLHAPATVCGPKKSTNLVKNKCVN  
FNFNGLTGTGVLTESNKKFLPFQQFGRDIADTTDAVRDPQTEILDITPCSFGGVSVITP  
GTNTSNQVAVLYQGVNCTEVPVAIHADQLTPTWRVYSTGSNVFQTRAGCLIGAEHVNSY  
ECDIPIGAGICASYQTQTN SPRRARSVASQSI IAYTMSLGAENSVAYSNNSIAIPTNFTI  
SVTTEILPVSMTKTSVDCTMYICGDSTEC SNLLLQYGSFCTQLNRALTGIAVEQDKNTQE  
VFAQVKQIYKTPPIKDFGGFNFSQILPDPSKPSKRSFIEDLLFNKVTLADAGFIKQYGDC  
LGDIAARDLICAQKFNGLTVLPPLLTDEMIAQYTSALLAGTITSGWTFGAGAALQIPFAM  
QMAYRFNGIGVTONVLYENQKLIANQFN SAIGKIQDSLSTASALGKLQNVVNQNAQALN  
TLVKQLSSNFGAISSVLNDILSRLDKVEAEVQIDRLITGRLQSLQTYVTQQILIRAAEIRA  
SANLAATKMSECVLQSKRVDFCGKGYHLSFPPQSAPHGVVFLHVTVVPAQEKNF TTAPA  
ICHDGKAHFPREGV FVSNGTHWFVTQRNFYEPQIITDNTFVSGNCDVVI GIVNNTVYDP  
LQPELDSFKEELDKYFKNHTSPDVLGDISGINASVVNIQKEIDRLNEVAKNLNESLIDL  
QELGKYEQYIKWPWYIWLGFIAGLIAIVMVTIMLCCMTSCC SCLKGCCSCGSCCKFDEDD  
SEPV LKGVKLHYT

>lcl|MZ555049.1\_prot\_QXN09329.1\_3 [gene=S] [protein=surface glycoprotein]  
[protein\_id=QXN09329.1] [location=21491..25306] [gbkey=CDS]  
MFVFLVLLPLVSSQCVNLRTRTQLPPAYTNSFTRGVYYPDKVFRSSVLHSTQDLFLPFFS  
NVTWFHAIHVSGTNGTKRFDNPVLPFNDGVYFASTEKSNIIRGWIFGTTLD SKTQSL LIV  
NNATNVVIKVC EFQFCNDPFLDVYYHKNNKSWMESG--VYSSANNCTFEYVSQPF LMDLE  
GKQGNFKNLREFVFKNIDGYFKIYSKHTPINLVRDL PQGFSALEPLVDLP IGINITRFQT  
LLALHRSYLTPGDSSSSGWTAGAAAYVGYLQPRTFLLKYNENGTITDAVDCALDPLSETK  
CTLKSFTVEKGIYQTSNFRVQPTESIVRFPNITNLCPFGEVFNATRFASVYAWNRRKRISN  
CVADYSVLVNSASFSTFKCYGVSPTKLNLDLCFTNVYADSFVIRGDEVRQIAPGQTGKIAD  
YNYKLPDDFTGCVIAWNSNNLDSKVGGNYNRYRRLFRKSNLKPFFERDI STEIYQAGSKPC  
NGVEGFNCYFPLQSYGFQPTNGVGYQPYRVVLSFELLHAPATVCGPKKSTNLVKNKCVN  
FNFNGLTGTGVLTESNKKFLPFQQFGRDIADTTDAVRDPQTEILDITPCSFGGVSVITP  
GTNTSNQVAVLYQGVNCTEVPVAIHADQLTPTWRVYSTGSNVFQTRAGCLIGAEHVNSY  
ECDIPIGAGICASYQTQTN SPRRARSVASQSI IAYTMSLGAENSVAYSNNSIAIPTNFTI  
SVTTEILPVSMTKTSVDCTMYICGDSTEC SNLLLQYGSFCTQLNRALTGIAVEQDKNTQE  
VFAQVKQIYKTPPIKDFGGFNFSQILPDPSKPSKRSFIEDLLFNKVTLADAGFIKQYGDC



LGDIARDLCAQKFNGLTVLPPLLTDEMIAQYTSALLAGTITSGWTFGAGAALQIPFAM  
QMAYRFNGIGVTQNVLYENQKLIANQFNSAIGKIQDSLSTASALGKLQNVVNQNAQALN  
TLVKQLSSNFGAISSVLNDILSRDKVEAEVQIDRLITGRLQSLQTYVTQQLIRAAEIRA  
SANLAATKMSECVLGQSKRVDFCGKGYHLMSFPQSAPHGVVFLHVTYVPAQEKNFTTAPA  
ICHGKAHFREGVFSNGTHWFVTQRNFYEPQIITTDNTFVSGNCDVVI GIVNNTVYDP  
LQPELDSFKEELDKYFKNHTSPDVDLGDISGINASVVNIQKEIDRLNEVAKNLNESLIDL  
QELGKYEQYIKWPWYIWLGFIAGLIAIVMVTIMLCCMTSCCCLKGCCSCGSCCKFDEDD  
SEPVKGVKLHYT
