# Supplementary material for: Two short low complexity regions (LCRs) are hallmark sequences of the Delta SARS-CoV-2 variant spike protein
Source: PubMed Central journal article supplement (PMC8766472; doi:10.1038/s41598-022-04976-8), 2022-01-18
Supplement: 41598_2022_4976_MOESM5_ESM.pdf [file 41598_2022_4976_MOESM5_ESM.pdf]

>lcl|MZ434666.1\_prot\_QWX08260.1\_3 [gene=S] [protein=surface glycoprotein]  
[protein\_id=QWX08260.1] [location=21512..25324] [gbkey=CDS]  
MFVFLVLLPLVSSQCVNLTIRRTQLPPAYTNSFTRGVYYPDKVFRSSVLHSTQDLFLPFFS  
NVTWFHAI--SGTNGTKRFDXXXXXXXXXXXXXXXXXKSNIIRGWIFGTTLDSKTQSLIV  
NNATNVVIKVFCEFCNDPFLGV-YHKNKSWMESEFRVYSSANNCTFEYVSQPFMDLE  
GKQGNFKNLREFVFKNIDGYFKIYSKHTPINLVRDLPQGFSALEPLVDLPIGINITRFQT  
LLALHRSYLTPGDSSSGWTAGAAAYVGYLQPRTFLLKYNENGTITDAVDCALDPLSETK  
CTLKSFTVEKGIYQTSNFRVQPTESIVRFPNITNLCPFGEVFNATRFASVYAWNRRKRISN  
CVADYSVLVNSASFSTFKCYGVSPTKLNLDLFCFTNVYADSFVIRGDEVRQIAPGQTGKIAD  
YNYKLPDDFTGCVIAWNSNNLDSKVGGNYNLYRLFRKSNLKPFERDISTEIQAGSTPC  
NGVEGFNCYFPLQSYGFQPTYGVGYQPYRVVLSFELLHAPATVCGPKKSTNLVKNKCVN  
FNFNGLTGTGVLTESNKKFLPFQQFGRDIDTTDAVRDPQTEILDITPCSFGGVSVITP  
GTNTSNQVAVLYQGVNCTEVPVAIHADQLTPTWRVYSTGNSNVFQTRAGCLIGAEHVNSY  
ECDIPIGAGICASYQTQTNSHRRARSVASQSI IAYTMSLGAENSVAYSNNIAIPIINFTI  
SVTTEILPVSMTKTSVDCTMYICGDSTECNLLLQYGSFCTQLNRALTGIAVEQDKNTQE  
VFAQVKQIYKTPPIKDFGGFNFSQILPDPSKPSKRSFIEDLLFNKVTLADAGFIKQYGDC  
LGDIAARDLICAQKFNGLTVLPPLLTDEMIAQYTSALLAGTITSGWTFGAGAALQIPFAM  
QMAYRFNGIGVTQNVLYENQKLIANQFNSAIGKIQDSLSTASALGKLQDVVNQNAQALN  
TLVKQLSSNFGAISSVLNDILARLDKVEAEVQIDRLITGRLQSLQTYVTQQILIRAAEIRA  
SANLAATKMSECVLGQSKRVDFCGKGYHLSFPPQSAPHGVVFLHVTYVPAQEKNFTTAPA  
ICHGKAHFPREGVFSNGTHWFVTQRNFYEPQIITHTNTFVSGNCDVVIQVNVNTVYDP  
LQPELDSFKEELDKYFKNHTSPDVLGDISGINASVVNIQKEIDRLNEVAKNLNESLIDL  
QELGKYEQYIKWPWYIWLGFIAGLIAIVMVTIMLCCMTSCCCLKGCCSCGSCCKFDEDD  
SEPVKLGVKLHYT

>lcl|MZ554580.1\_prot\_QXN04039.1\_3 [gene=S] [protein=surface glycoprotein]  
[protein\_id=QXN04039.1] [location=21524..25345] [gbkey=CDS]  
MFVFLVLLPLVSSQCVNLTTRTQLPPAYINSLTRGVYYPDKVFRSSVLHSTQDLFLPFFS  
NVTWFHAIHVSNTNGTKRFDNPVLPFNDGVYFASTEKSNIIRGWIFGTTLDSKTQSLIV  
NNATNVVIKVFCEFCNDPFLGVYYHKNKSWTESESRVYSSANNCTFEYVSQPFMDLE  
GKQGNFKNLREFVFKNIDGYFKIYSKHTPINLVRDLPQGFSALEPLVDLPIGINITRFQT  
LLALHRSYLTPVDSSSGWTAGAAAYVGYLQPRTFLLKYNENGTITDAVDCALDPLSETK  
CTLKSFTVEKGIYQTSNFRVQPTESIVRFPNITNLCPFGEVFNATRFASVYAWNRRKRISN  
CVADYSVLVNSASFSTFKCYGVSPTKLNLDLFCFTNVYADSFVIRGDEVRQIAPGQTGKIAD  
YNYKLPDDFTGCVIAWNSNNLDSKVGGNYNLYRLFRKSNLKPFERDISTEIQAGNTPC  
NGVKGFNCYFPLQSYGFQPTNGVGYQPYRVVLSFELLHAPATVCGPKKSTNLVKNKCVN  
FNFNGLTGTGVLTESNKKFLPFQQFGRDIADTTDAVRDPQTEILDITPCSFGGVSVITP  
GTNTSNQVAVLYQGVNCTEVPVAIHADQLTPTWRVYSTGNSNVFQTRAGCLIGAEYVNSY  
ECDIPIGAGICASYQTQTNSHRRARSVASQSI IAYTMSLGAENSVAYSNNIAIPTNFTI  
SVTTEILPVSMTKTSVDCTMYICGDSTECNLLLQYGSFCTQLNRALTGIAVEQDKNTQE  
VFAQVKQIYKTPPIKDFGGFNFSQILPDPSKPSKRSFIEDLLFNKVTLADAGFIKQYGDC  
LGDIAARDLICAQKFNGLTVLPPLLTDEMIAQYTSALLAGTITSGWTFGAGAALQIPFAM  
QMAYRFNGIGVTQNVLYENQKLIANQFNSAIGKIQHLSLSTASALGKLQDVVNQNAQALN  
TLVKQLSSNFGAISSVLNDILSRLDKVEAEVQIDRLITGRLQSLQTYVTQQILIRAAEIRA  
SANLAATKMSECVLGQSKRVDFCGKGYHLSFPPQSAPHGVVFLHVTYVPAQEKNFTTAPA  
ICHGKAHFPREGVFSNGTHWFVTQRNFYEPQIITDNTFVSGNCDVVIQVNVNTVYDP  
LQPELDSFKEELDKYFKNHTSPDVLGDISGINASVVNIQKEIDRLNEVAKNLNESLIDL  
QELGKYEQYIKWPWYIWLGFIAGLIAIVMVTIMLCCMTSCCCLKGCCSCGSCCKFDEDH  
SEPVKLGVKLHYT

>lcl|MZ411886.1\_prot\_QWT98319.1\_3 [gene=S] [protein=surface glycoprotein]  
[protein\_id=QWT98319.1] [location=21452..25273] [gbkey=CDS]  
MFVFLVLLPLVSSQCVNFTNRTQLPSAYTNSFTRGVYYPDKVFRSSVLHSTQDLFLPFFS  
NVTWFHAIHVSNTNGTKRFDNPVLPFNDGVYFASTEKSNIIRGWIFGTTLDSKTQSLIV  
NNATNVVIKVFCEFCNYPFLGVYYHKNKSWMESEFRVYSSANNCTFEYVSQPFMDLE  
GKQGNFKNLSEFVFKNIDGYFKIYSKHTPINLVRDLPQGFSALEPLVDLPIGINITRFQT  
LLALHRSYLTPGDSSSGWTAGAAAYVGYLQPRTFLLKYNENGTITDAVDCALDPLSETK  
CTLKSFTVEKGIYQTSNFRVQPTESIVRFPNITNLCPFGEVFNATRFASVYAWNRRKRISN  
CVADYSVLVNSASFSTFKCYGVSPTKLNLDLFCFTNVYADSFVIRGDEVRQIAPGQTGTIAD  
YNYKLPDDFTGCVIAWNSNNLDSKVGGNYNLYRLFRKSNLKPFERDISTEIQAGSTPC

NGVKGFNCYFPLQSYGFQPTYGVGYQPYRVVLSFELLHAPATVCGPKKSTNLVKNKCVN  
FNFNGLTGTGVLTESNKKFLPFQQFGRDIADTTDAVRDPQTEILDITPCSFGGVSVITP  
GTNTSNQVAVLYQGVNCTEVPVAIHADQLTPTWRVYSTGNSVFQTRAGCLIGAEYVNNNSY  
ECDIPIGAGICASYQTQTNSPRRARSVASQSI IAYTMSLGAENSVAYSNNSIAIPTNFTI  
SVTTEILPVSMKTSTVDCTMYICGDSTECNSLLLQYGSFCTQLNRALTGIAVEQDKNTQE  
VFAQVKQIYKTPPIKDFGGFNFSQILPDPSKPSKRSFIEDLLFNKVTLADAGFIKQYGDC  
LGDIAARDLICAQKFNGLTVLPPLLTDEMIAQYTSALLAGTITSGWTFGAGAALQIPFAM  
QMAYRFNGIGVTONVLYENQKLIANQFNSAIGKIQDSLSTASALGKLQDVVNQNAQALN  
TLVKQLSSNFGAISSVLNDILSRLDKVEAEVQIDRLITGRLQSLQTYVTQQILIRAAEIRA  
SANLAAIKMSECVLQSKRVDFCGKGYHLMSPQSAPHGVVFLHVTVYVPAQEKNFTTAPA  
ICHGKAHFPREGVFSVNGTHWFVTQRNFYEPQIITDNTFVSGNCDVVI GIVNNTVYDP  
LQPELDSFKEELDKYFKNHTSPDVLGDISGINASFVNIQKEIDRLNEVAKNLNESLIDL  
QELGKYEQYIKWPWYIWLGFIAGLIAIVMVTIMLCCMTSCCCLKGCCSCGSCCKFDEDD  
SEPVKLGVKLHYT

>lcl|MZ306939.1\_prot\_QVX53289.1\_3 [gene=S] [protein=surface glycoprotein]  
[protein\_id=QVX53289.1] [location=21509..25324] [gbkey=CDS]  
MFVFLVLLPLVSSQCVNLRTRTQLPPAYTNSFTRGVYYPDKVFRSSVLHSTQDLFLPFFS  
NVTWFHAIHVSNGTNGTTRFDNPVLPFNDGVYFASTEKSNIRGWIFGTTLDLSDKTSQSLIV  
NNATNVVIKVECFQFCNDPFLDVYYHKNKSWMESG--VYSSANNCTFEYVSQPFMDLE  
GKQGNFNKLNREFVFKNIDGYFKIYSKHTPINLVRDLPPQGFSALEPLVDLPIGINITRFQT  
LLALHRSYLT PGDSSSGWTAGAAAYVGYLQPRTFLLKYNENGTITDAVDCALDPLSETK  
CTLKSFTVEKGIYQTSNFRVQPTESIVRFPNITNLCPFGEVFNATRFASVYAWNRRKRISN  
CVADYSVLVNSASFSTFKCYGVSPTKLNLDLCTNVYADS FVIRGDEVQRQIAPGQTGKIAD  
YNYKLPDDFTGCVIAWNSNNLDSKVGNYNYLYRLFRKSNLKPFERDISTEIQAGSTPC  
NGVEGFNCYFPLQSYGFQPTYGVGYQPYRVVLSFELLHAPATVCGPKKSTNLVKNKCVN  
FNFNGLTGTGVLTESNKKFLPFQQFGRDIDTTDAVRDPQTEILDITPCSFGGVSVITP  
GTNTSNQVAVLYQGVNCTEVPVAIHADQLTPTWRVYSTGNSVFQTRAGCLIGAEHVNNNSY  
ECDIPIGAGICASYQTQTNSHRRARSVASQSI IAYTMSLGAENSVAYSNNSIAIPIINFTI  
SVTTEILPVSMKTSTVDCTMYICGDSTECNSLLLQYGSFCTQLNRALTGIAVEQDKNTQE  
VFAQVKQIYKTPPIKDFGGFNFSQILPDPSKPSKRSFIEDLLFNKVTLADAGFIKQYGDC  
LGDIAARDLICAQKFNGLTVLPPLLTDEMIAQYTSALLAGTITSGWTFGAGAALQIPFAM  
QMAYRFNGIGVTONVLYENQKLIANQFNSAIGKIQDSLSTASALGKLQDVVNQNAQALN  
TLVKQLSSNFGAISSVLNDILARLDKVEAEVQIDRLITGRLQSLQTYVTQQILIRAAEIRA  
SANLAATKMSECVLQSKRVDFCGKGYHLMSPQSAPHGVVFLHVTVYVPAQEKNFTTAPA  
ICHGKAHFPREGVFSVNGTHWFVTQRNFYEPQIITDNTFVSGNCDVVI GIVNNTVYDP  
LQPELDSFKEELDKYFKNHTSPDVLGDISGINASVNIQKEIDRLNEVAKNLNESLIDL  
QELGKYEQYIKWPWYIWLGFIAGLIAIVMVTIMLCCMTSCCCLKGCCSCGSCCKFDEDD  
SEPVKLGVKLHYT

>lcl|MZ412056.1\_prot\_QWU00312.1\_3 [gene=S] [protein=surface glycoprotein]  
[protein\_id=QWU00312.1] [location=21452..25264] [gbkey=CDS]  
MFVFFVLLPLVSSQCVNLTTRTQLPPAYTNSFTRGVYYPDKVFRSSVLHSTQDLFLPFFS  
NVTWFHAI--SGTNGTKRFDNPVLPFNDGVYFASTEKSNIRGWIFGTTLDLSDKTSQSLIV  
NNATNVVIKVECFQFCNDPFLGV-YHKNKSWMESEFRVYSSANNCTFEYVSQPFMDLE  
GKQGNFNKLNREFVFKNIDGYFKIYSKHTPINLVRDLPPQGFSALEPLVDLPIGINITRFQT  
LLALHRSYLT PGDSSSGWTAGAAAYVGYLQPRTFLLKYNENGTITDAVDCALDPLSETK  
CTLKSFTVEKGIYQTSNFRVQPTESIVRFPNITNLCPFGEVFNATRFASVYAWNRRKRISN  
CVADYSVLVNSASFSTFKCYGVSPTKLNLDLCTNVYADS FVIRGDEVQRQIAPGQTGKIAD  
YNYKLPDDFTGCVIAWNSNNLDSKVGNYNYLYRLFRKSNLKPFERDISTEIQAGSTPC  
NGVEGFNCYFPLQSYGFQPTYGVGYQPYRVVLSFELLHAPATVCGPKKSTNLVKNKCVN  
FNFNGLTGTGVLTESNKKFLPFQQFGRDIDTTDAVRDPQTEILDITPCSFGGVSVITP  
GTNTSNQVAVLYQGVNCTEVPVAIHADQLTPTWRVYSTGNSVFQTRAGCLIGAEHVNNNSY  
ECDIPIGAGICASYQTQTNSHRRARSVASQSI IAYTMSLGAENSVAYSNNSIAIPIINFTI  
SVTTEILPVSMKTSTVDCTMYICGDSTECNSLLLQYGSFCTQLNRALTGIAVEQDKNTQE  
VFAQVKQIYKTPPIKYFGFNFSQILPDPSKPSKRSFIEDLLFNKVTLADAGFIKQYGDC  
LGDIAARDLICAQKFNGLTVLPPLLTDEMIAQYTSALLAGTITSGWTFGAGAALQIPFAM  
QMAYRFNGIGVTONVLYENQKLIANQFNSAIGKIQDSLSTASALGKLQDVVNQNAQALN  
TLVKQLSSNFGAISSVLNDILARLDKVEAEVQIDRLITGRLQSLQTYVTQQILIRAAEIRA  
SANLAATKMSECVLQSKRVDFCGKGYHLMSPQSAPHGVVFLHVTVYVPAQEKNFTTAPA

ICHDGKAHFPREGVFVSNNGTHWFVTQRNFYEPQIIITHTNTFVSGNCDVVIGIVNNTVYDP  
LQPELDSFKEELDKYFKNHTSPDVDLGDISGINASVVNIQKEIDRLNEVAKNLNESLIDL  
QELGKYEQYIKWPWYIWLGFIAGLIAIVMVTIMLCCMTSCCCLKGCCSCGSCCKFDEDD  
SEPVKGVKHLHYT

>lcl|MZ414596.1\_prot\_QWU53463.1\_3 [gene=S] [protein=surface glycoprotein]  
[protein\_id=QWU53463.1] [location=21551..25363] [gbkey=CDS]  
MFVFLVLLPLVSSQCVNLTTRTQLPPAYTNSFTRGVYYPDKVFRSSVLHSTQDLFLPFFS  
NVTWFHAI--SGTNGTKRFDNPVLPFNDGVYFASTEKSNIIRGWIFGTTLDSKTQSLIV  
NNATNVVIKVCFFQFCNDPFLGV-YHKNNKSWMESEFRVYSSANNCTFEYVSQPFMDLE  
GKQGNFKNLREFVFKNIDGYFKIYSKHTPINLVRDLPQGFSALEPLVDLPIGINITRFQT  
LLALHRSYLTPGDSSSGWTAGAAAYVGYLQPRTFLLKYNENGTITDAVDCALDPLSETK  
CTLKSFTVEKGIYQTSNFRVQPTESIVRFPNITNLCPFGEVFNATRFASVYAWNRRKRISN  
CVADYSVLVNSASFSTFKCYGVSPTKLNLDLFCFTNVYADSFVIRGDEVRQIAPGQTGKIAD  
YNYKLPDDFTGCVIAWNSNNLDSKVGGNYNLYRLFRKSNLKPFERDISTEIQAGSTPC  
NGVEGFNCYFPLQSYGFQPTYGVGYQPYRVVLSFELLHAPATVCGPKKSTNLVKNKCVN  
FNFNGLTGTGVLTESNKKFLPFQFGRDIDDDTTDAVRDPQTLEILDITPCSFGGVSVITP  
GTNTSNQVAVLYQGVNCTEVPVAIHADQLTPTWRVYSTGNSVVFQTRAGCLIGAEHVNSY  
ECDIPIGAGICASYQTQTNSHRRARSVASQSI IAYTMSLGAENSVAYSNNIAIPINFTI  
SVTTEILPVSMTKTSVDCTMYICGDSTECNLLLQYGSFCTQLNRALTGIAVEQDKNTQE  
VFAQVKQIYKTPPIKDFGGFNFSQILPDPSKPSKRSFIEDLLFNKVTLADAGFIKQYGDC  
LGDIAARDLICAQKFNGLTVLPLLTDEMIAQYTSALLAGTITSGWTFGAGAALQIPFAM  
QMAYRFNGIGVTQNVLYENQKLIANQFNFAIGKIQDSLSTASALGKLQDVVNQNAQALN  
TLVKQLSSNFGAISSVLNDILARLDKVEAEVQIDRLITGRLQSLQTYVTQQLIRAAEIRA  
SANLAATKMSECVLGQSKRVDFCGKGYHLSFPPQSAPHGVVFLHVTYVPAQEKNFTTAPA  
ICHDGKAHFPREGVFVSNNGTHWFVTQRNFYEPQIIITHTNTFVSGNCDVVIGIVNNTVYDP  
LQPELDSFKEELDKYFKNHTSPDVDLGDISGINASVVNIQKEIDRLNEVANNLNESLIDL  
QELGKYEQYIKWPWYIWLGFIAGLIAIVMVTIMLCCMTSCCCLKGCCSCGSCCKFDEDD  
SEPVKGVKHLHYT

>lcl|MZ434919.1\_prot\_QWX09653.1\_3 [gene=S] [protein=surface glycoprotein]  
[protein\_id=QWX09653.1] [location=21500..25312] [gbkey=CDS]  
MFVFLVLLPLVSSQCVNFTTRTQLPPAYTNSFTRGVYYPDKVFRSSVLHSTQDLFLPFFS  
NVTWFHAI--SGTNGTKRFDNPVLPFNDGVYFASTEKSNIIRGWIFGTTLDSKTQSLIV  
NNATNVVIKVCFFQFCNDPFLGV-YHKNNKSWMESEFRVYSSANNCTFEYVSQPFMDLE  
GKQGNFKNLREFVFKNIDGYFKIYSKHTPINLVRDLPQGFSALEPLVDLPIGINITRFQT  
LLALHRSYLTPGDSSSGWTAGAAAYVGYLQPRTFLLKYNENGTITDAVDCALDPLSETK  
CTLKSFTVEKGIYQTSNFRVQPTESIVRFPNITNLCPFGEVFNATRFASVYAWNRRKRISN  
CVADYSVLVNSASFSTFKCYGVSPTKLNLDLFCFTNVYADSFVIRGDEVRQIAPGQTGKIAD  
YNYKLPDDFTGCVIAWNSNNLDSKVGGNYNLYRLFRKSNLKPFERDISTEIQAGSTPC  
NGVEGFNCYFPLQSYGFQPTYGVGYQPYRVVLSFELLHAPATVCGPKKSTNLVKNKCVN  
FNFNGLTGTGVLTESNKKFLPFQFGRDIDDDTTDAVRDPQTLEILDITPCSFGGVSVITP  
GTNTSNQVAVLYQGVNCTEVPVAIHADQLTPTWRVYSTGNSVVFQTRAGCLIGAEHVNSY  
ECDIPIGAGICASYQTQTNSHRRARSVASQSI IAYTMSLGAENSVAYSNNIAIPINFTI  
SVTTEILPVSMTKTSVDCTMYICGDSTECNLLLQYGSFCTQLNRALTGIAVEQDKNTQE  
VFAQVKQIYKTPPIKDFGGFNFSQILPDPSKPSKRSFIEDLLFNKVTLADAGFIKQYGDC  
LGDIAARDLICAQKFNGLTVLPLLTDEMIAQYTSALLAGTITSGWTFGAGAALQIPFAM  
QMAYRFNGIGVTQNVLYENQKLIANQFNFAIGKIQDSLSTASALGKLQDVVNQNAQALN  
TLVKQLSSNFGAISSVLNDILARLDKVEAEVQIDRLITGRLQSLQTYVTQQLIRAAEIRA  
SANLAATKMSECVLGQSKRVDFCGKGYHLSFPPQSAPHGVVFLHVTYVPAQEKNFTTAPA  
ICHDGKAHFPREGVFVSNNGTHWFVTQRNFYEPQIIITHTNTFVSGNCDVVIGIVNNTVYDP  
LQPELDSFKEELDKYFKNHTSPDVDLGDISGINASVVNIQKEIDRLNEVAKNLNESLIDL  
QELGKYEQYIKWPWYIWLGFIAGLIAIVMVTIMLCCMTSCCCLKGCCSCGSCCKFDEDD  
SEPVKGVKHLHYT

>lcl|MZ411813.1\_prot\_QWT97464.1\_3 [gene=S] [protein=surface glycoprotein]  
[protein\_id=QWT97464.1] [location=21515..25327] [gbkey=CDS]  
MFVFLVLLPLVSSQCVNLTTRTQLPPAYTNSFTRGVYYPDKVFRSSVLHSTQDLFLPFFS  
NVTWFHAI--SGTNGTKRFDNPVLPFNDGVYFASTEKSNIIRGWIFGTTLDSKTQSLIV  
NNATNVVIKVCFFQFCNDPFLGV-YHKNNKSWMESEFRVYSSANNCTFEYVSQPFMDLE  
GKQGNFKNLREFVFKNIDGYFKIYSKHTPINLVRDLPQGFSALEPLVDLPIGINITRFQT

LLALHRSYLTPGDSSSGWTAGAAAYVGYLQPRTFLLKYNENGTITDAVDCALDPLSETK  
CTLKSFTVEKGIYQTSNFRVQPTESIVRFPNITNLCPFGEVFNATRFASVYAWNRRKRISN  
CVADYSVLVNSASFSTFKCYGVSPTKLNLDLCFTNVYADSFVIRGDEVRQIAPGQTGKIAD  
YNYKLPDDFTGCVIAWNSNNLDSKVGGNYNLYRLFRKSNLKPFERDI STEIYQAGSTPC  
NGVEGFNCYFPLQSYGFQPTYGVGYQPYRVVLSFELLHAPATVCGPKKSTNLVKNKCVN  
FNFNGLTGTGVLTESNKKFLPFQQFGRDIDDDTTDAVRDPQTEILDITPCSFGGVSVITP  
GTNTSNQVAVLYQGVNCTEVPVAIHADQLTPTWRVYSTGSNVFQTRAGCLIGAHEVNNNSY  
ECDIPIGAGICASYQTQTNSHRRARVASQSI IAYTMSLGAENSVAYSNNIAIPIINFTI  
SVTTEILPVSMTKTSVDCTMYICGDSTECNLLLQYGSFCTQLNRALTGIAVEQDKNTQE  
VFAQVKQIYKTPPIKDFGGFNFSQILPDPSKPSKRSFIEDLLFNKVTLADAGFIKQYGDC  
LGDIAARDLICAQKFNGLTVLPPLLTDEMIAQYTSALLAGTITSGWTFGAGAALQIPFAM  
QMAYRFNGIGVTQNVLYENQKLIANQFNSAIGKIQDSLSTASALGKLQDVVNQNAQALN  
TLVKQLSSNFGAISSVLNDILARLDKVEAEVQIDRLITGRLQSLQTYVTQQLIRAAEIRA  
SANLAATKMSECVLQSKRVDFCGKGYHLMSFPQSAPHGVVFLHVTVVPAQEKNFTTAPA  
ICHDGKAHFPREGVFSNGTHWFVTQRNFYEPQIITTHNTFVSGNCDVVI GIVNNTVYDP  
LQPELDSFKEELDKYFKNHTSPDVLGDISGINASVVNIQKEIDRLNEVAKNLNESLIDL  
QELGKYEQYIKWPWYIWLGFIAGLIAIVMVTIMLCCMTSCCCLKGCCSCGSCCKFDEDD  
SEPVKGVKHLHYT

>lcl|MZ412157.1\_prot\_QWU01502.1\_3 [gene=S] [protein=surface glycoprotein]  
[protein\_id=QWU01502.1] [location=21515..25327] [gbkey=CDS]  
MFVFLVLLPLVSSQCVNLTTRTQLPPAYTNSFTRGVYYPDKVFRSSVLHSTQDLFLPFFS  
NVTWFHAI--SGTNGTKRFDNPVLPFNDGVYFASTEKSNIIRGWIFGTTLDSKTQSLIV  
NNATNVVIKVFCEFCNDPFLGV-YHKNNKSWMESEFRVYSSANNCTFEYVSQPFLLMDLE  
GKQGNFKNLREFVFKNIDGYFKIYSKHTPINLVRDLPPQGFSALEPLVDLPIGINITRFQT  
LLALHRSYLTPGDSSSGWTAGAAAYVGYLQPRTFLLKYNENGTITDAVDCALDPLSETK  
CTLKSFTVEKGIYQTSNFRVQPTESIVRFPNITNLCPFGEVFNATRFASVYAWNRRKRISN  
CVADYSVLVNSASFSTFKCYGVSPTKLNLDLCFTNVYADSFVIRGDEVRQIAPGQTGKIAD  
YNYKLPDDFTGCVIAWNSNNLDSKVGGNYNLYRLFRKSNLKPFERDI STEIYQAGSTPC  
NGVEGFNCYFPLQSYGFQPTYGVGYQPYRVVLSFELLHAPATVCGPKKSTNLVKNKCVN  
FNFNGLTGTGVLTESNKKFLPFQQFGRDIDDDTTDAVRDPQTEILDITPCSFGGVSVITP  
GTNTSNQVAVLYQGVNCTEVPVAIHADQLTPTWRVYSTGSNVFQTRAGCLIGAHEVNNNSY  
ECDIPIGAGICASYQTQTNSHRRARVASQSI IAYTMSLGAENSVAYSNNIAIPIINFTI  
SVTTEILPVSMTKTSVDCTMYICGDSTECNLLLQYGSFCTQLNRALTGIAVEQDKNTQE  
VFAQVKQIYKTPPIKDFGGFNFSQILPDPSKPSKRSFIEDLLFNKVTLADAGFIKQYGDC  
LGDIAARDLICAQKFNGLTVLPPLLTDEMIAQYTSALLAGTITSGWTFGAGAALQIPFAM  
QMAYRFNGIGVTQNVLYENQKLIANQFNSAIGKIQDSLSTASALGKLQDVVNQNAQALN  
TLVKQLSSNFGAISSVLNDILARLDKVEAEVQIDRLITGRLQSLQTYVTQQLIRAAEIRA  
SANLAATKMSECVLQSKRVDFCGKGYHLMSFPQSAPHGVVFLHVTVVPAQEKNFTTAPA  
ICHDGKAHFPREGVFSNGTHWFVTQRNFYEPQIITTHNTFVSGNCDVVI GIVNNTVYDP  
LQPELDSFKEELDKYFKNHTSPDVLGDISGINASVVNIQKEIDRLNEVAKNLNESLIDL  
QELGKYEQYIKWPWYIWLGFIAGLIAIVMVTIMLCCMTSCCCLKGCCSCGSCCKFDEDD  
SEPVKGVKHLHYT

>lcl|MZ434515.1\_prot\_QWX06459.1\_3 [gene=S] [protein=surface glycoprotein]  
[protein\_id=QWX06459.1] [location=21512..25324] [gbkey=CDS]  
MFVFLVLLPLVSSQCVNLTTRTQLPPAYTNSFTRGVYYPDKVFRSSVLHSTQDLFLPFFS  
NVTWFHAI--SGTNGTKRFDNPVLPFNDGVYFASTEKSNIIRGWIFGTTLDSKTQSLIV  
NNATNVVIKVFCEFCNDPFLGV-YHKNNKSWMESEFRVYSSANNCTFEYVSQPFLLMDLE  
GKQGNFKNLREFVFKNIDGYFKIYSKHTPINLVRDLPPQGFSALEPLVDLPIGINITRFQT  
LLALHRSYLTPGDSSSGWTAGAAAYVGYLQPRTFLLKYNENGTITDAVDCALDPLSETK  
CTLKSFTVEKGIYQTSNFRVQPTESIVRFPNITNLCPFGEVFNATRFASVYAWNRRKRISN  
CVADYSVLVNSASFSTFKCYGVSPTKLNLDLCFTNVYADSFVIRGDEVRQIAPGQTGKIAD  
YNYKLPDDFTGCVIAWNSNNLDSKVGGNYNLYRLFRKSNLKPFERDI STEIYQAGSTPC  
NGVEGFNCYFPLQSYGFQPTYGVGYQPYRVVLSFELLHAPATVCGPKKSTNLVKNKCVN  
FNFNGLTGTGVLTESNKKFLPFQQFGRDIDDDTTDAVRDPQTEILDITPCSFGGVSVITP  
GTNTSNQVAVLYQGVNCTEVPVAIHADQLTPTWRVYSTGSNVFQTRAGCLIGAHEVNNNSY  
ECDIPIGAGICASYQTQTNSHRRARVASQSI IAYTMSLGAENSVAYSNNIAIPIINFTI  
SVTTEILPVSMTKTSVDCTMYICGDSTECNLLLQYGSFCTQLNRALTGIAVEQDKNTQE  
VFAQVKQIYKTPPIKDFGGFNFSQILPDPSKPSKRSFIEDLLFNKVTLADAGFIKQYGDC

LGDIAARDLICAQKFNGLTVLPPLLTDEMIAQYTSALLAGTITSGWTFGAGAALQIPFAM  
QMA YRFNGIGV TQ NVLYENQKLIANQFN SAIGKIQDSL S STASALGKLQDVVNQNAQALN  
TLVKQLSSNFGA ISSV LNDILARLDKVEAEVQIDRLITGRLQSLQTYVTQQLIRAAEIRA  
SANLAATKMSECVLGQSKRVDFCGKGYHLSFPPQSAPHGVVFLHVTVYVPAQEKNFTTAPA  
ICH DGKAHFPREGVFVSNGTHWFVTQRNFYEPQIITHTNTFVSGNCDVVI GIVNNTVYDP  
LQPELDSFKEELDKYFKNHTSPDVLGDISGINASVVNIQKEIDRLNEVAKNLNESLIDL  
QELGKYEQYIKWPWYIWLGFIAGLIAIVMVTIMLCCMTSCCSCLKGCCSCGSCCKFDEDD  
SEPV LKGVKLHYT

>lcl|MW750027.1\_prot\_QSX91521.1\_3 [gene=S] [protein=surface glycoprotein]  
[protein\_id=QSX91521.1] [location=21549..25370] [gbkey=CDS]  
MFVFFVLLPLVSSQCVNLTRTQLPPAYTNSFTRGVYYPDKVFRSSVLHSTQDLFLPFFS  
NVTWFHAIHVS GTNGTKRFDNPVLPFNDGVYFASIEKSNIIRGWIFGTTLDSKTQSL LIV  
NNATNVVIK VCE FQFCNDPFLGVYYHKNNKSWMESEFRVYSSANNCTFEYVSQPF LMDLE  
GKQGNFKNLREFVFKNIDGYFKIYSKHTPINLVRDL PQGFSALEPLVDLP IGINITRFQT  
LLALHRSYLT PGDSSSGW TAGAAAYVGYLQPRTFLLKYNENGTITDAVDCALDPLSETK  
CTLKSFTVEKGIYQTSNFRVQPTESIVRFPNITNLCPFGEVFNATRFASVYAWNRRKRISN  
CVADYSVL YNSASFSTFKCYGVSPTKLNLDLCFTNVYADSFVIRGDEV RQIAPGQTGKIAD  
YNYKLPDDFTGCVIAWNSNNLDSKVG GNYNYLYR LFRKSNLKP FERDI STEIYQAGSTPC  
NGVKGFNCYFPLQSYGFQPTNGVGYQPYRVV VLSFELLHAPATVCGPKKSTNLVKNKCVN  
FNFNGLTGTGVLTESNKKFLPFQ QFGRDIADTTDAVRDPQTLEILDITPCSFGGVS VITP  
GTNTSNQVAVLYQGVNCTEVPVAIHADQLTPTWRVYSTG SNVFQTRAGCLIGAEYVNN SY  
ECDIPIGAGICASYQTQTNSPRRARSVASQSI IAYTMSLGAENSVAYSNN SIAIPTNFTI  
SVTTEILPVSMTKTSVDCTMYICGDSTEC SNLLLQYGSFCTQLNRALTGIAVEQDKNTQE  
VFAQVKQIYKTPPIKDFGGFNFSQILPDPSKPSKRSFIEDLLFNKVTLADAGFIKQY GDC  
LGDIAARDLICAQKFNGLTVLPPLLTDEMIAQYTSALLAGTITSGWTFGAGAALQIPFAM  
QMA YRFNGIGV TQ NVLYENQKLIANQFN SAIGKIQDSL S STASALGKLQDVVNQNAQALN  
TLVKQLSSNFGA ISSV LNDILSRLDKVEAEVQIDRLITGRLQSLQTYVTQQLIRAAEIRA  
SANLAAIKMSECVLGQSKRVDFCGKGYHLSFPPQSAPHGVVFLHVTVYVPAQEKNFTTAPA  
ICH DGKAHFPREGVFVSNGTHWFVTQRNFYEPQIITDNTFVSGNCDVVI GIVNNTVYDP  
LQPELDSFKEELDKYFKNHTSPDVLGDISGINASVVNIQKEIDRLNEVAKNLNESLIDL  
QELGKYEQYIKWPWYIWLGFIAGLIAIVMVTIMLCCMTSCCSCLKGCCSCGSCCKFDEDD  
SEPV LKGVKLHYT

>lcl|MW750080.1\_prot\_QSX92155.1\_3 [gene=S] [protein=surface glycoprotein]  
[protein\_id=QSX92155.1] [location=21497..25318] [gbkey=CDS]  
MFVFFVLLPLVSSQCVNLTRTQLPPAYTNSFTRGVYYPDKVFRSSVLHSTQDLFLPFFS  
NVTWFHAIHVS GTNGTKRFDNPVLPFNDGVYFASIEKSNIIRGWIFGTTLDSKTQSL LIV  
NNATNVVIK VCE FQFCNDPFLGVYYHKNNKSWMESEFRVYSSANNCTFEYVSQPF LMDLE  
GKQGNFKNLREFVFKNIDGYFKIYSKHTPINLVRDL PQGFSALEPLVDLP IGINITRFQT  
LLALHRSYLT PGDSSSGW TAGAAAYVGYLQPRTFLLKYNENGTITDAVDCALDPLSETK  
CTLKSFTVEKGIYQTSNFRVQPTESIVRFPNITNLCPFGEVFNATRFASVYAWNRRKRISN  
CVADYSVL YNSASFSTFKCYGVSPTKLNLDLCFTNVYADSFVIRGDEV RQIAPGQTGKIAD  
YNYKLPDDFTGCVIAWNSNNLDSKVG GNYNYLYR LFRKSNLKP FERDI STEIYQAGSTPC  
NGVKGFNCYFPLQSYGFQPTNGVGYQPYRVV VLSFELLHAPATVCGPKKSTNLVKNKCVN  
FNFNGLTGTGVLTESNKKFLPFQ QFGRDIADTTDAVRDPQTLEILDITPCSFGGVS VITP  
GTNTSNQVAVLYQGVNCTEVPVAIHADQLTPTWRVYSTG SNVFQTRAGCLIGAEYVNN SY  
ECDIPIGAGICASYQTQTNSPRRARSVASQSI IAYTMSLGAENSVAYSNN SIAIPTNFTI  
SVTTEILPVSMTKTSVDCTMYICGDSTEC SNLLLQYGSFCTQLNRALTGIAVEQDKNTQE  
VFAQVKQIYKTPPIKDFGGFNFSQILPDPSKPSKRSFIEDLLFNKVTLADAGFIKQY GDC  
LGDIAARDLICAQKFNGLTVLPPLLTDEMIAQYTSALLAGTITSGWTFGAGAALQIPFAM  
QMA YRFNGIGV TQ NVLYENQKLIANQFN SAIGKIQDSL S STASALGKLQDVVNQNAQALN  
TLVKQLSSNFGA ISSV LNDILSRLDKVEAEVQIDRLITGRLQSLQTYVTQQLIRAAEIRA  
SANLAAIKMSECVLGQSKRVDFCGKGYHLSFPPQSAPHGVVFLHVTVYVPAQEKNFTTAPA  
ICH DGKAHFPREGVFVSNGTHWFVTQRNFYEPQIITDNTFVSGNCDVVI GIVNNTVYDP  
LQPELDSFKEELDKYFKNHTSPDVLGDISGINASVVNIQKEIDRLNEVAKNLNESLIDL  
QELGKYEQYIKWPWYIWLGFIAGLIAIVMVTIMLCCMTSCCSCLKGCCSCGSCCKFDEDD  
SEPV LKGVKLHYT

>lcl|MW891208.1\_prot\_QTP82767.1\_3 [gene=S] [protein=surface glycoprotein]  
[protein\_id=QTP82767.1] [location=21524..25345] [gbkey=CDS]

MFVFFVLLPLVSSQCVNLTTRTQLPPAYTNSFTRGVYYPDKVFRSSVLHSTQDLFLPFFS  
NVTWFHAIHVSNGTNGTKRFDNPVLPFNDGVYFASIEKSNIIRGWIFGTTLDSKTQSLLIV  
NNATNVVIKVFCEFCNDPFLGVYHKNKSWMESEFRVYSSANNCTFEYVSQPFMDLE  
GKQGNFKNLREFVFKNIDGYFKIYSKHTPINLVRDLPOGFSALEPLVDLPIGINITRFQT  
LLALHRSYLT PGDSSSGWTAGAAAYVGYLQPRTFLLKYNENGTITDAVDCALDPLSETK  
CTLKSFTVEKGIYQTSNFRVQPTESIVRFPNITNLCPFGEVFNATRFASVYAWNRRKRISN  
CVADYSVLVNSASFSTFKCYGVSPTKLNLDLCFTNVYADSFVIRGDEVRQIAPGQTGKIAD  
YNYKLPDDFTGCVIAWNSNLDLSDKVGGNYNLYRLFRKSNLKPFERDISTERIYQAGSTPC  
NGVKGFNCYFPLQSYGFQPTNGVGYQPYRVVLSFELLHAPATVCGPKKSTNLVKNKCVN  
FNFNGLTGTGVLTESNKKFLPFQQFGRDIADTTDAVRDPQTLEILDITPCSFGGVSVITP  
GTNTSNQVAVLYQGVNCTEVPVAIHADQLTPTWRVYSTGNSNVFQTRAGCLIGAEYVNSY  
ECDIPIGAGICASYQTQTNPRRARSVASQSI IAYTMSLGAENSVAYSNNIAIPTNFTI  
SVTTEILPVSMTKTSVDCTMYICGDSTECNLLLQYGSFCTQLNRALTGIAVEQDKNTQE  
VFAQVKQIYKTPPIKDFGGFNFSQILPDPSKPSKRSFIEDLLFNKVTLADAGFIKQYGDC  
LGDIAARDLICAQKFNGLTVLPPLLTDEMIAQYTSALLAGTITSGWTFGAGAALQIPFAM  
QMAYRFNGIGVTQNVLYENQKLIANQFNFAIGKIQDSLSTASALGKLQDVVNQNAQALN  
TLVKQLSSNFGAISSVLNDILSRLDKVEAEVQIDRLITGRLQSLQTYVTQQILIRAAEIRA  
SANLAAIKMSECVLQSKRVDFCGKGYHLSMFPQSAPHGVVFLHVTVYVPAQEKNF TTAPA  
ICHGKAHFPREGVFSNGTHWFVTQRNFYEPQIITDNTFVSGNCDVVI GIVNNTVYDP  
LQPELDSFKEELDKYFKNHTSPDVLGDISGINASVVNIQKEIDRLNEVAKNLNESLIDL  
QELGKYEQYIKWPWYIWLGFIAGLIAIVMVTIMLCCMTSCCCLKGCCSCGSCCKFDEDD  
SEPVKGVKLYHT

>lcl|MZ100817.1\_prot\_QUS75326.1\_3 [gene=S] [protein=surface glycoprotein]  
[protein\_id=QUS75326.1] [location=21524..25345] [gbkey=CDS]

MFVFFVLLPLVSSQCVNLTTRTQLPPAYTNSFTRGVYYPDKVFRSSVLHSTQDLFLPFFS  
NVTWFHAIHVSNGTNGTKRFDNPVLPFNDGVYFASIEKSNIIRGWIFGTTLDSKTQSLLIV  
NNATNVVIKVFCEFCNDPFLGVYHKNKSWMESEFRVYSSANNCTFEYVSQPFMDLE  
GKQGNFKNLREFVFKNIDGYFKIYSKHTPINLVRDLPOGFSALEPLVDLPIGINITRFQT  
LLALHRSYLT PGDSSSGWTAGAAAYVGYLQPRTFLLKYNENGTITDAVDCALDPLSETK  
CTLKSFTVEKGIYQTSNFRVQPTESIVRFPNITNLCPFGEVFNATRFASVYAWNRRKRISN  
CVADYSVLVNSASFSTFKCYGVSPTKLNLDLCFTNVYADSFVIRGDEVRQIAPGQTGKIAD  
YNYKLPDDFTGCVIAWNSNLDLSDKVGGNYNLYRLFRKSNLKPFERDISTERIYQAGSTPC  
NGVKGFNCYFPLQSYGFQPTNGVGYQPYRVVLSFELLHAPATVCGPKKSTNLVKNKCVN  
FNFNGLTGTGVLTESNKKFLPFQQFGRDIADTTDAVRDPQTLEILDITPCSFGGVSVITP  
GTNTSNQVAVLYQGVNCTEVPVAIHADQLTPTWRVYSTGNSNVFQTRAGCLIGAEYVNSY  
ECDIPIGAGICASYQTQTNPRRARSVASQSI IAYTMSLGAENSVAYSNNIAIPTNFTI  
SVTTEILPVSMTKTSVDCTMYICGDSTECNLLLQYGSFCTQLNRALTGIAVEQDKNTQE  
VFAQVKQIYKTPPIKDFGGFNFSQILPDPSKPSKRSFIEDLLFNKVTLADAGFIKQYGDC  
LGDIAARDLICAQKFNGLTVLPPLLTDEMIAQYTSALLAGTITSGWTFGAGAALQIPFAM  
QMAYRFNGIGVTQNVLYENQKLIANQFNFAIGKIQDSLSTASALGKLQDVVNQNAQALN  
TLVKQLSSNFGAISSVLNDILSRLDKVEAEVQIDRLITGRLQSLQTYVTQQILIRAAEIRA  
SANLAAIKMSECVLQSKRVDFCGKGYHLSMFPQSAPHGVVFLHVTVYVPAQEKNF TTAPA  
ICHGKAHFPREGVFSNGTHWFVTQRNFYEPQIITDNTFVSGNCDVVI GIVNNTVYDP  
LQPELDSFKEELDKYFKNHTSPDVLGDISGINASVVNIQKEIDRLNEVAKNLNESLIDL  
QELGKYEQYIKWPWYIWLGFIAGLIAIVMVTIMLCCMTSCCCLKGCCSCGSCCKFDEDD  
SEPVKGVKLYHT

>lcl|MZ323773.1\_prot\_QWB90502.1\_3 [gene=S] [protein=surface glycoprotein]  
[protein\_id=QWB90502.1] [location=21516..25337] [gbkey=CDS]

MFVFFVLLPLVSSQCVNLTTRTQLPPAYTNSFTRGVYYPDKVFRSSVLHSTQDLFLPFFS  
NVTWFHAIHVSNGTNGTKRFDNPVLPFNDGVYFASIEKSNIIRGWIFGTTLDSKTQSLLIV  
NNATNVVIKVFCEFCNDPFLGVYHKNKSWMESEFRVYSSANNCTFEYVSQPFMDLE  
GKQGNFKNLREFVFKNIDGYFKIYSKHTPINLVRDLPOGFSALEPLVDLPIGINITRFQT  
LLALHRSYLT PGDSSSGWTAGAAAYVGYLQPRTFLLKYNENGTITDAVDCALDPLSETK  
CTLKSFTVEKGIYQTSNFRVQPTESIVRFPNITNLCPFGEVFNATRFASVYAWNRRKRISN  
CVADYSVLVNSASFSTFKCYGVSPTKLNLDLCFTNVYADSFVIRGDEVRQIAPGQTGKIAD  
YNYKLPDDFTGCVIAWNSNLDLSDKVGGNYNLYRLFRKSNLKPFERDISTERIYQAGSTPC  
NGVKGFNCYFPLQSYGFQPTNGVGYQPYRVVLSFELLHAPATVCGPKKSTNLVKNKCVN  
FNFNGLTGTGVLTESNKKFLPFQQFGRDIADTTDAVRDPQTLEILDITPCSFGGVSVITP

GTNTSNQVAVLYQGVNCTEVPVAIHADQLTPTWRVYSTGNSVVFQTRAGCLIGAEYVNNNSY  
ECDIPIGAGICASYQTQTNSPRRARSVASQSI IAYTMSLGAENSVAYSNNNSIAIPTNFTI  
SVTTEILPVSMKTSTVDCTMYICGDSTECNSLLLQYGSFCTQLNRALTGIAVEQDKNTQE  
VFAQVKQIYKTPPIKDFGGFNFSQILPDPSKPSKRSFIEDLLFNKVTLADAGFIKQYGDC  
LGDIAARDLICAQKFNGLTVLPPLLTDEMIAQYTSALLAGTITSGWTFGAGAALQIPFAM  
QMAYRFNGIGVTONVLYENQKLIANQFNSAIGKIQDSLSTASALGKLDVNVQNAQALN  
TLVKQLSSNFGAISSVNLNDILSRDKVEAEVQIDRLITGRLQSLQTYVTQQLIRAAEIRA  
SANLAAIKMSECVLQSKRVDFCGKGYHLMSFPQSAPHGVVFLHVTVYVPAQEKNFTTAPA  
ICHGKAHFPREGVFSNGTHWFVTQRNFYEPQIITDNTFVSGNCDVVI GIVNNTVYDP  
LQPELDSFKEELDKYFKNHTSPDVLGDISGINASVVNIQKEIDRLNEVAKNLNESLIDL  
QELGKYEQYIKWPWYIWLGFIAGLIAIVMVTIMLCCMTSCCSCLKGCCSCGSCCKFDEDD  
SEPVKGVKLYHT

>lcl|MZ415787.1\_prot\_QWU67680.1\_3 [gene=S] [protein=surface glycoprotein]  
[protein\_id=QWU67680.1] [location=21524..25345] [gbkey=CDS]  
MFVFFVLLPLVSSQCVNLTTRTQLPPAYTNSFTRGVYYPDKVFRSSVLHSTQDLFLPFFS  
NVTWFHAIHVSNGTKRFDNPVLPFNDGVYFASIEKSNIRGWIFGTTLDSTQSLLVV  
NNATNVVIKVECFQFCNDPFLGVYHKNKSWMESEFRVYSSANNCTFEYVSQPFMLDLE  
GKQGNFNKLRREFVFNIDGYFKIYSKHTPINLVRDLDPQGFSALEPLVDLPIGINITRFQT  
LLALHRSYLTPGGSSSGWTAGAAAYVGYLQPRTFLLKYNENGTITDAVDCALDPLSETK  
CTLKSFTVEKGIYQTSNFRVQPTESIVRFPNITNLCPFGEVFNATRFASVYAWNRRKRISN  
CVADYSVLVNSASFSTFKCYGVSPTKLNLDLCFTNVYADS FVIRGDEVQRQIAPGQTGKIAD  
YNYKLPDDFTGCVIAWNSNNLDSKVGGNYNLYRLFRKSNLKPFERDISTERIYQAGSTPC  
NGVKGFNCYFPLQSYGFQPTNGVGYQPYRVVVL SFELLHAPATVCGPKKSTNLVKNKCVN  
FNFNGLTGTGVLTESNKKFLPFQFGRDIADTTDAVRDPQTLEILDITPCSFGGVSVITP  
GTNTSNQVAVLYQGVNCTEVPVAIHADQLTPTWRVYSTGNSVVFQTRAGCLIGAEHVNNNSY  
ECDIPIGAGICASYQTQTNSPRRARSVASQSI IAYTMSLGVENSVAYSNNNSIAIPTNFTI  
SVTTEILPVSMKTSTVDCTMYICGDSTECNSLLLQYGSFCTQLNRALTGIAVEQDKNTQE  
VFAQVKQIYKTPPIKDFGGFNFSQILPDPSKPSKRSFIEDLLFNKVTLADAGFIKQYGDC  
LGDIAARDLICAQKFNGLTVLPPLLTDEMIAQYTSALLAGTITSGWTFGAGAALQIPFAM  
QMAYRFNGIGVTONVLYENQKLIANQFNSAIGKIQDSLSTASALGKLDVNVQNAQALN  
TLVKQLSSNFGAISSVNLNDILSRDKVEAEVQIDRLITGRLQSLQTYVTQQLIRAAEIRA  
SANLAATKMSECVLQSKRVDFCGKGYHLMSFPQSAPHGVVFLHVTVYVPAQEKNFTTAPA  
ICHGKAHFPREGVFSNGTHWFVTQRNFYEPQIITDNTFVSGNCDVVI GIVNNTVYDP  
LQPELDSFKEELDKYFKNHTSPDVLGDISGINASVVNIQKEIDRLNEVAKNLNESLIDL  
QELGKYEQYIKWPWYIWLGFIAGLIAIVMVTIMLCCMTSCCSCLKGCCSCGSCCKFDEDD  
SEPVKGVKLYHT

>lcl|MZ540275.1\_prot\_QXL75598.1\_3 [gene=S] [protein=surface glycoprotein]  
[protein\_id=QXL75598.1] [location=21516..25334] [gbkey=CDS]  
MFVFLVLLPLVSSQCVNLTTRTQLPPAYTNSFTRGVYYPDKVFRSSVLHSTQDLFLPFFS  
NVTWFHAIHVSNGTKRFGNPVLPFNDGVYFASTKSNIRGWIFGTTLDSTQSLLVV  
NNATNVVIKVECFQFCNDPFLGV-YHKNKSWMESESRVYSSANNCTFEYVSQPFMLDLE  
GKQGNFNKLRREFVFNIDGYFKIYSKHTPINLVRDLDPQGFSALEPLVDLPIGINITRFQT  
LLALHRSYLTPGDSSSGWTAGAAAYVGYLQPRTFLLKYNENGTITDAVDCALDPLSETK  
CTLKSFTVEKGIYQTSNFRVQPTESIVRFPNITNLCPFGEVFNATRFASVYAWNRRKRISN  
CVADYSVLVNSASFSTFKCYGVSPTKLNLDLCFTNVYADS FVIRGDEVQRQIAPGQTGKIAD  
YNYKLPDDFTGCVIAWNSNNLDSKVGGNYNRYRLFRKSNLKPFERDISTERIYQAGSTPC  
NGVEGFNCYFPLQSYGFQPTNGVGYQPYRVVVL SFELLHAPATVCGPKKSTNLVKNKCVN  
FNFNGLTGTGVLTESNKKFLPFQFGRDIADTTDAVRDPQTLEILDITPCSFGGVSVITP  
GTNTSNQVAVLYQGVNCTEVPVAIHADQLTPTWRVYSTGNSVVFQTRAGCLIGAEHVNNNSY  
ECDIPIGAGICASYQTQTNSHRRARSVASQSI IAYTMSLGAENSVAYSNNNSIAIPTNFTI  
SVTTEILPVSMKTSTVDCTMYICGDSTECNSLLLQYGSFCTQLNRALTGIAVEQDKNTQE  
VFAQVKQIYKTPPIKDFGGFNFSQILPDPSKPSKRSFIEDLLFNKVTLADAGFIKQYGDC  
LGDIAARDLICAQKFNGLNVLPLLTDEMIAQYTSALLAGTITSGWTFGAGAALQIPFAM  
QMAYRFNGIGVTONVLYENQKLIANQFNSAIGKIQDSLSTASALGKLQHVNVQNAQALN  
TLVKQLSSNFGAISSVNLNDILSRDKVEAEVQIDRLITGRLQSLQTYVTQQLIRAAEIRA  
SANLAATKMSECVLQSKRVDFCGKGYHLMSFPQSAPHGVVFLHVTVYVPAQEKNFTTAPA  
ICHGKAHFPREGVFSNGTHWFVTQRNFYEPQIITDNTFVSGNCDVVI GIVNNTVYDP  
LQPELDSFKEELDKYFKNHTSPDVLGDISGINASVVNIQKEIDRLNEVAKNLNESLIDL

QELGKYEQYIKWPWYIWLGFIAGLIAIVMVTIMLCCMTSCCSCLKGCCSCGSCCKFDEDD  
SEPVLLKGVKLHYT

>lcl|MZ554467.1\_prot\_QXN02789.1\_3 [gene=S] [protein=surface glycoprotein]  
[protein\_id=QXN02789.1] [location=21452..25270] [gbkey=CDS]  
MFVFLVLLPLVSSQCVNLTTRTQLPPAYTNSFTRGVYYPDKVFRSSVLHSTQDLFLPFFS  
NVTWFHAIHVSGTNGTKRFGNPVLPFNDGVYFASTEKSNIIRGWIFGTTLDSKTQSLLIV  
NNATNVVIKVECFQFCNDPFLGV-YHKNNKSWMESESRVYSSANNCTFEYVSQPFLMDLE  
GKQGNFKNLREFVFKNIDGYFKIYSKHTPINLVRDLPQGFSALEPLVDLPIGINITRFQT  
LLALHRSYLTPGDSSSGWTAGAAAYVGYLQPRTFLLKYNENGTITDAVDCALDPLSETK  
CTLKSFTVEKGIYQTSNFRVQPTESIVRFPNITNLCPFGEVFNATRFASVYAWNRRKRISN  
CVADYSVLVNSASFSTFKCYGVSPTKLNLDLCFTNVYADSFVIRGDEVRQIAPGQTGKIAD  
YNYKLPDDFTGCVIAWNSNNLDSKVGGNYNRYRRLFRKSNLKPFERDISTEIQAGSTPC  
NGVEGFNCYFPLQSYGFQPTNGVGYQPYRVVLSFELLHAPATVCGPKKSTNLVKNKCVN  
FNFNGLTGTGVLTESNKKFLPFQFGRDIADTTDAVRDPQTLEILDITPCSFGGVSVITP  
GTNTSNQVAVLYQGVNCTEVPVAIHADQLTPTWRVYSTGNSNVFQTRAGCLIGAEHVNSY  
ECDIPIGAGICASYQTQTNSHRRARSVASQSI IAYTMSLGAENSVAYSNNIAIPTNFTI  
SVTTEILPVSMTKTSVDCTMYICGDSTECSNLLLQYGSFCTQLNRALTGIAVEQDKNTQE  
VFAQVKQIYKTPPIKDFGGFNFSQILPDPSKPSKRSFIEDLLFNKVTLADAGFIKQYGDC  
LGDIAARDLICAQKFNGLNVLPLLTDEMIAQYTSALLAGTITSGWTFGAGAALQIPFAM  
QMAYRFNGIGVTQNVLYENQKLIANQFNSAIGKIQDSLSTASALGKLQHVVNQNAQALN  
TLVKQLSSNFGAISSVLNDILSRLDKVEAEVQIDRLITGRLQSLQTYVTQQILIRAAEIRA  
SANLAATKMSECVLGQSKRVDFCGKGYHLMSFPQSAPHGVVFLHVTYVPAQEKNFTTAPA  
ICHGKAHFPREGVFSNGTHWFVTQRNFYEPQIITDNTFVSGNCDVVI GIVNNTVYDP  
LQPELDSFKEELDKYFKNHTSPDVLGDISGINASVVNIQKEIDRLNEVAKNLNESLIDL  
QELGKYEQYIKWPWYIWLGFIAGLIAIVMVTIMLCCMTSCCSCLKGCCSCGSCCKFDEDD  
SEPVLLKGVKLHYT

>lcl|MZ413530.1\_prot\_QWU19600.1\_3 [gene=S] [protein=surface glycoprotein]  
[protein\_id=QWU19600.1] [location=21552..25370] [gbkey=CDS]  
MFVFLVLLPLVSSQCVNLTTRTQLPPAYTNSFTRGVYYPDKVFRSSVLHSTQDLFLPFFS  
NVTWFHAIHVSGTNGTKRFGNPVLPFNDGVYFASTEKSNIIRGWIFGTTLDSKTQSLLIV  
NNATNVVIKVECFQFCNDPFLGV-YHKNNKSWMESESRVYSSANNCTFEYVSQPFLMDLE  
GKQGNFKNLREFVFKNIDGYFKIYSKHTPINLVRDLPQGFSALEPLVDLPIGINITRFQT  
LLALHRSYLTPGDSSSGWTAGAAAYVGYLQPRTFLLKYNENGTITDAVDCALDPLSETK  
CTLKSFTVEKGIYQTSNFRVQPTESIVRFPNITNLCPFGEVFNATRFASVYAWNRRKRISN  
CVADYSVLVNSASFSTFKCYGVSPTKLNLDLCFTNVYADSFVIRGDEVRQIAPGQTGKIAD  
YNYKLPDDFTGCVIAWNSNNLDSKVGGNYNRYRRLFRKSNLKPFERDISTEIQAGSTPC  
NGVEGFNCYFPLQSYGFQPTNGVGYQPYRVVLSFELLHAPATVCGPKKSTNLVKNKCVN  
FNFNGLTGTGVLTESNKKFLPFQFGRDIADTTDAVRDPQTLEILDITPCSFGGVSVITP  
GTNTSNQVAVLYQGVNCTEVPVAIHADQLTPTWRVYSTGNSNVFQTRAGCLIGAEHVNSY  
ECDIPIGAGICASYQTQTNPRRARSVASQSI IAYTMSLGAENSVAYSNNIAIPTNFTI  
SVTTEILPVSMTKTSVDCTMYICGDSTECSNLLLQYGSFCTQLNRALTGIAVEQDKNTQE  
VFAQVKQIYKTPPIKDFGGFNFSQILPDPSKPSKRSFIEDLLFNKVTLADAGFIKQYGDC  
LGDIAARDLICAQKFNGLNVLPLLTDEMIAQYTSALLAGTITSGWTFGAGAALQIPFAM  
QMAYRFNGIGVTQNVLYENQKLIANQFNSAIGKIQDSLSTASALGKLQHVVNQNAQALN  
TLVKQLSSNFGAISSVLNDILSRLDKVEAEVQIDRLITGRLQSLQTYVTQQILIRAAEIRA  
SANLAATKMSECVLGQSKRVDFCGKGYHLMSFPQSAPHGVVFLHVTYVPAQEKNFTTAPA  
ICHGKAHFPREGVFSNGTHWFVTQRNFYEPQIITDNTFVSGNCDVVI GIVNNTVYDP  
LQPELDSFKEELDKYFKNHTSPDVLGDISGINASVVNIQKEIDRLNEVAKNLNESLIDL  
QELGKYEQYIKWPWYIWLGFIAGLIAIVMVTIMLCCMTSCCSCLKGCCSCGSCCKFDEDD  
SEPVLLKGVKLHYT

>lcl|MZ416208.1\_prot\_QWU72725.1\_3 [gene=S] [protein=surface glycoprotein]  
[protein\_id=QWU72725.1] [location=21522..25343] [gbkey=CDS]  
MFVFFVLLPLVSSQCVNLTTRTQLPPAYTNSFTRGVYYPDKVFRSSVLHSTQDLFLPFFS  
NVTWFHAIHVSGTNGTNRFDNPVLPFNDGVYFASIEKSNIIRGWIFGTTLDSKTQSLLIV  
NNATNVVIKVECFQFCNDPFLGVYHKNNKSWMESEFRVYSSANNCTFEYVSQPFLMDLE  
GKQGNFKNLREFVFKNIDGYFKIYSKHTPINLVRDLPQGFSALEPLVDLPIGINITRFQT  
LLALHRSYLTPGGSSSGWTAGAAAYVGYLQPRTFLLKYNENGTITDAVDCALDPLSETK  
CTLKSFTVEKGIYQTSNFRVQPTESIVRFPNITNLCPFGEVFNATRFASVYAWNRRKRISN



CVADYSVLVNSASFSTFKCYGVSPTKLNLDLCFTNVYADSFVIRGDEVQRQIAPGQTGKIAD  
YNYKLPDDFTGCVIAWNSNNLDSKVGGNYNLYRLFRKSNLKPFFERDI STEIYQAGNTPC  
NGVEGFNCYFPLQSYGFQPTNGVGYQPYRVVLSFELLHAPATVCGPKKSTNLVKNKCVN  
FNFNGLTGTGVLTESNKKFLPFQQFGRDIADTTDAVRDPQTEILDITPCSFGGVSVITP  
GTNTSNQVAVLYQGVNCTEVPVAIHADQLTPTWRVYSTGSNVFQTRAGCLIGAHEVNNNSY  
ECDIPIGAGICASYQTQTNsprrarsvasqsi iaytmslgaensvaysnnsiaiptnfti  
svtteilpvsmtktsvdctmyicgdsteCSNLLLQYGSFCTQLNRALTGIAVEQDKNTQE  
VFAQVKQIYKTPPIKDFGGFNFSQILPDPSKPSKRSFIEDLLFNKVTLADAGFIKQYGDC  
LGDIAARDLICAQKFNGLTVLPPLLTDEMIAQYTSALLAGTITSGWTFGAGAALQIPFAM  
QMAYRFNGIGVTONVLYENQKLIANQFNsaigkiQDSLsSTASALGKLQDVVNQNAALN  
TLVKQLSSNFGAISSVLDILSRLDKVEAEVQIDRLITGRLQSLQTYVTQQLIRAAEIRA  
SANLAATKMSECVLQSKRVDFCGKGYHLMSFPQSAPHGVVFLHVTYVPAQEKNFTTAPA  
ICHDGKAHFPREGVFSNGTHWFVTQRNFYEPQIITDNTFVSGNCDVVI GIVNNTVYDP  
LQPELDSFKEELDKYFKNHTSPDVLGDISGINASVVNIQKEIDRLNEVAKNLNESLIDL  
QELGKYEQYIKWPWYIWLGFIAGLIAIVMVTIMLCCMTSCCSCLKGCCSCGSCCKFDEDD  
SEPVKGVKLYHT

>lcl|MZ414686.1\_prot\_QWU54540.1\_3 [gene=S] [protein=surface glycoprotein]

[protein\_id=QWU54540.1] [location=21560..25381] [gbkey=CDS]  
MFVFLVLLPLVSIQCVNLTTRTQLPPAYTNSFTRGVYYPDKVFRSSVLHSTQDLFLPFFS  
NVTWFHAIHVSGTNGTKRFDNPVLPFNDGVYFASTEKSNIIRGWIFGTTLDsktQsLLIV  
NNATNVVIKVCefQFCNDPFLGVYYHKNNKSCMESEFRVYSSANNCTFEYVSQPFLMDLE  
GKQGNFNKLRREFVFKNIDGYFKIYskhtPINLVRDLPQGfSALEPLVDLPIGINITRFQT  
LLALHRSYLTpgDSSSGWTAGAAAYVGYLQPRTFLLKYNENGTITDAVDCALDPLSETK  
CTLKSFTVEKGIYQTSNFRVQPTESIVRFPNITNLCPFGEVFNATRFASVYAWNRKRISN  
CVADYSVLVNSASFSTFKCYGVSPTKLNLDLCFTNVYADSFVIRGDEVQRQIAPGQTGKIAD  
YNYKLPDDFTGCVIAWNSNNLDSKVGGNYNRYRLFRKSNLKPFFERDI STEIYQAGSTPC  
NGVEGFNCYFPLQSYGFQPTNGVGYQPYRVVLSFELLHAPATVCGPKKSTNLVKNKCVN  
FNFNGLTGTGVLTESNKKFLPFQQFGRDIADTTDAVRDPQTEILDITPCSFGGVSVITP  
GTNTSNQVAVLYQGVNCTEVPVAIHADQLTPTWRVYSTGSNVFQTRAGCLIGAHEVNNNSY  
ECDIPIGAGICASYQTQTNsprrarsvasqsi iaytmslgaensvaysnnsiaiptnfti  
svtteilpvsmtktsvdctmyicgdsteCSNLLLQYGSFCTQLNRALTGIAVEQDKNTQE  
VFAQVKQIYKTPPIKDFGGFNFSQILPDPSKPSKRSFIEDLLFNKVTLADAGFIKQYGDC  
LGDIAARDLICAQKFNGLTVLPPLLTDEMIAQYTSALLAGTITSGWTFGAGAALQIPFAM  
QMAYRFNGIGVTONVLYENQKLIANQFNsaigkiQDSLsSTASALGKLQDVVNQNAQALN  
TLVKQLSSNFGAISSVLDILSRLDKVEAEVQIDRLITGRLQSLQTYVTQQLIRAAEIRA  
SANLAATKMSECVLQSKRVDFCGKGYHLMSFPQSAPHGVVFLHVTYVPAQEKNFTTAPA  
ICHDGKAHFPREGVFSNGTHWFVTQRNFYEPQIITDNTFVSGNCDVVI GIVNNTVYDP  
LQPELDSFKEELDKYFKNHTSPDVLGDISGINASVVNIQKEIDRLNEVAKNLNESLIDL  
QELGKYEQYIKWPWYIWLGFIAGLIAIAMVTIMLCCMTSCCSCLKGCCSCGSCCKFDEDD  
SEPVKGVKLYHT

>lcl|MZ340544.1\_prot\_QWE52371.1\_3 [gene=S] [protein=surface glycoprotein]

[protein\_id=QWE52371.1] [location=21513..25328] [gbkey=CDS]  
MFVFLVLLPLVSSQCVNLTTRTQLPPAYTNSFTRGVYYPDKVFRSSVLHSTQDLFLPFFS  
NVTWFHAIHVSGTNGTKRFDNPVLPFNDGVYFASTEKSNIIRGWIFGTTLDsktQsLLIV  
NNATNVVIKVCefQFCNDPFLGVYYHKNNKSWMESG--VYSSANNCTFEYVSQPFLMDLE  
GKQGNFNKLRREFVFKNIDGYFKIYskhtPINLVRDLPQGfSALEPLVDLPIGINITRFQT  
LLALHRSYLTpgDSSSGWTAGAAAYVGYLQPRTFLLKYNENGTITDAVDCALDPLSETK  
CTLKSFTVEKGIYQTSNFRVQPTESIVRFPNITNLCPFGEVFNATRFASVYAWNRKRISN  
CVADYSVLVNSASFSTFKCYGVSPTKLNLDLCFTNVYADSFVIRGDEVQRQIAPGQTGKIAD  
YNYKLPDDFTGCVIAWNSNNLDSKVGGNYNLYRLFRKSNLKPFFERDI STEIYQAGSTPC  
NGVEGFNCYFPLQSYGFQPTNGVGYQPYRVVLSFELLHAPATVCGPKKSTNLVKNKCVN  
FNFNGLTGTGVLTESNKKFLPFQQFGRDIADTTDAVRDPQTEILDITPCSFGGVSVITP  
GTNTSNQVAVLYQGVNCTEVPVAIHADQLTPTWRVYSTGSNVFQTRAGCLIGAHEVNNNSY  
ECDIPIGAGICASYQTQTNsprrarsvasqsi iaytmslgaensvaysnnsiaiptnfti  
svtteilpvsmtktsvdctmyicgdsteCSNLLLQYGSFCTQLNRALTGIAVEQDKNTQE  
VFAQVKQIYKTPPIKDFGGFNFSQILPDPSKPSKRSFIEDLLFNKVTLADAGFIKQYGDC  
LGDIAARDLICAQKFNGLTVLPPLLTDEMIAQYTSALLAGTITSGWTFGAGAALQIPFAM  
QMAYRFNGIGVTONVLYENQKLIANQFNsaigkiQDSLsSTASALGKLQDVVNQNAQALN

TLVKQLSSNFGAISSVLNDILSRDKVEAEVQIDRLITGRLQSLQTYVTQQLIRAAEIRA  
SANLAATKMSECVLGQSKRVDFCGKGYHLSFPPQSAPHGVVFLHVTYVPAQEKNFTTAPA  
ICHGKAHFPREGVFSNGTHWFVTQRNFYEPQIITTDNTFVSGNCDVVI GIVNNTVYDP  
LQPELDSFKEELDKYFKNHTSPDVDLGDISGINASVVNIQKEIDRLNEVAKNLNESLIDL  
QELGKYEQYIKWPWYIWLGFIAGLIAIVMVTIMLCCMTSCCSCLKGCCSCGSCCKFDEDD  
SEPVKGVKLVHT

>lcl|MZ072282.1\_prot\_QU086358.1\_3 [gene=S] [protein=surface glycoprotein]  
[protein\_id=QU086358.1] [location=21509..25321] [gbkey=CDS]  
MFVFLVLLPLVSSQCVNLTTRTQLPPAYTNSFTRGVYYPDKVFRSSVLHSTQDLFLPFFS  
NVTWFHAI--SGTNGTKRFDNPVLPFNDGVYFASTEKSNIIRGWIFGTTLDSKTQSLIV  
NNATNVVIKVECFQFCNDPFLGV-YHKNKNSWMESEFRVYSSANNCTFEYVSQPFMDLE  
GKQGNFKNLREFVFKNIDGYFKIYSKHTPINLVRDLPPQGFSALEPLVDLPIGINITRFQT  
LLALHRSYLTPGDSSSGWTAGAAAYVGYLQPRTFLLKYNENGTITDAVDCALDPLSETK  
CTLKSFTVEKGIYQTSNFRVQPTESIVRFPNITNLCPFGEVFNATRFASVYAWNRRKRISN  
CVADYSVLVNSASFSTFKCYGVSPTKLNLDLFCFTNVYADSFVIRGDEVQRQIAPGQTGKIAD  
YNYKLPDDFTGCVIAWNSNNLDSKVGGNYNLYRLFRKSNLKPFERDISTERIYQAGNTPC  
NGVEGFNCYFPLQSYGFQPTNGVGYQPYRVVLSFELLHAPATVCGPKKSTNLVKNKCVN  
FNFNGLTGTGVLTESNKKFLPFQFGRDIADTTDAVRDPQTLLEILDITPCSFGGVSVITP  
GTNTSNQVAVLYQGVNCTEVPVAIHADQLTPTWRVYSTGNSVVFQTRAGCLIGAEHVNSY  
ECDIPIGAGICASYQTQTNPRRARSVASQSI IAYTMSLGAENSVAYSNNNSIAIPTNFTI  
SVTTEILPVSMTKTSVDCTMYICGDSTECNSLLLQYGSFCTQLNRALTGIAVEQDKNTQE  
VFAQVKQIYKTPPIKDFGGFNFSQILPDPSKPSKRSFIEDLLFNKVTLADAGFIKQYGDC  
LGDIAARDLICAQKFNGLTVLPPLTDEMIAQYTSALLAGTITSGWTFGAGAALQIPFAM  
QMAYRFNGIGVTQNVLYENQKLIANQFNSAIGKIQDSLSTASALGKLQDVVNQNAQALN  
TLVKQLSSNFGAISSVLNDILSRDKVEAEVQIDRLITGRLQSLQTYVTQQLIRAAEIRA  
SANLAATKMSECVLGQSKRVDFCGKGYHLSFPPQSAPHGVVFLHVTYVPAQEKNFTTAPA  
ICHGKAHFPREGVFSNGTHWFVTQRNFYEPQIITHTNTFVSGNCDVVI GIVNNTVYDP  
LQPELDSFKEELDKYFKNHTSPDVDLGDISGINASVVNIQKEIDRLNEVAKNLNESLIDL  
QELGKYEQYIKWPWYIWLGFIAGLIAIVMVTIMLCCMTSCCSCLKGCCSCGSCCKFDEDD  
SEPVKGVKLVHT

>lcl|MZ411803.1\_prot\_QWT97349.1\_3 [gene=S] [protein=surface glycoprotein]  
[protein\_id=QWT97349.1] [location=21331..25143] [gbkey=CDS]  
MFVFFVLLPLVSSQCVNLTTRTQLPPAYTNSFTRGVYYPDKVFRSSVLHSTQDLFLPFFS  
NVTWFHAI--SGTNGTKRFDNPVLPFNDGVYFASTEKSNIIRGWIFGTTLDSKTQSLIV  
NNATNVVIKVECFQFCNDPFLGV-YHKNKNSWMESEFRVYSSANNCTFEYVSQPFMDLE  
GKQGNFKNLREFVFKNIDGYFKIYSKHTPINLVRDLPPQGFSALEPLVDLPIGINITRFQT  
LLALHRSYLTPGGSSSGWTAGAAAYVGYLQPRTFLLKYNENGTITDAVDCALDPLSETK  
CTLKSFTVEKGIYQTSNFRVQPTESIVRFPNITNLCPFGEVFNATRFASVYAWNRRKRISN  
CVADYSVLVNSASFSTFKCYGVSPTKLNLDLFCFTNVYADSFVIRGDEVQRQIAPGQTGKIAD  
YNYKLPDDFTGCVIAWNSNNLDSKVGGNYNLYRLFRKSNLKPFERDISTERIYQAGNTPC  
NGVEGFNCYFPLQSYGFQPTNGVGYQPYRVVLSFELLHAPATVCGPKKSTNLVKNKCVN  
FNFNGLTGTGVLTESNKKFLPFQFGRDIADTTDAVRDPQTLLEILDITPCSFGGVSVITP  
GTNTSNQVAVLYQGVNCTEVPVAIHADQLTPTWRVYSTGNSVVFQTRAGCLIGAEHVNSY  
ECDIPIGAGICASYQTQTNSHRRARSVASQSI IAYTMSLGAENSVAYSNNNSIAIPTNFTI  
SVTTEILPVSMTKTSVDCTMYICGDSTECNSLLLQYGSFCTQLNRALTGIAVEQDKNTQE  
VFAQVKQIYKTPPIKDFGGFNFSQILPDPSKPSKRSFIEDLLFNKVTLADAGFIKQYGDC  
LGDIAARDLICAQKFNGLTVLPPLTDEMIAQYTSALLAGTITSGWTFGAGAALQIPFAM  
QMAYRFNGIGVTQNVLYENQKLIANQFNSAIGKIQDSLSTASALGKLQDVVNQNAQALN  
TLVKQLSSNFGAISSVLNDILSRDKVEAEVQIDRLITGRLQSLQTYVTQQLIRAAEIRA  
SANLAATKMSECVLGQSKRVDFCGKGYHLSFPPQSAPHGVVFLHVTYVPAQEKNFTTAPA  
ICHGKAHFPREGVFSNGTHWFVTQRNFYEPQIITHTNTFVSGNCDVVI GIVNNTVYDP  
LQPELDSFKEELDKYFKNHTSPDVDLGDISGINASVVNIQKEIDRLNEVAKNLNESLIDL  
QELGKYEQYIKWPWYIWLGFIAGLIAIVMVTIMLCCMTSCCSCLKGCCSCGSCCKFDEDD  
SEPVKGVKLVHT

>lcl|MZ481925.1\_prot\_QXF28777.1\_3 [gene=S] [protein=surface glycoprotein]  
[protein\_id=QXF28777.1] [location=21509..25324] [gbkey=CDS]  
MFVFLVLLPLVSSQCVNLRTRTQLPPAYTNSFTRGVYYPDKVFRSSVLHSTQDLFLPFFS  
NVTWFHAIHVSNTGTRFDNPVLPFNDGVYFASTEKSNIIRGWIFGTTLDSKTQSLIV

NNATNVVIKVCFEQFCNDPFLGVYYHKNNKSWMESG--VYSSANNCTFEYVSQPFLMDLE  
GKQGNFKNLREFVFKNIDGYFKIYSKHTPINLVRDLPQGFSALEPLVDLPIGINITRFQT  
LLALHRSYLT PGDSSSGWTAGAAAAYVGYLQPRTFLLKYNENGTITDAVDCALDPLSETK  
CTLKSFTVEKGIYQTSNFRVQPTESIVRFPNITNLCPFGEVFNATRFASVYAWNRRKRISN  
CVADYSVLVNSASFSTFKCYGVSPTKLNLDLCFTNVYADSFVIRGDEVRQIAPGQTGKIAD  
YNYKLPDDFTGCVIAWNSNNLDSKVGGNYNRYRRLFRKSNLKPFERDI STEIYQAGSKPC  
NGVEGFNCXFPLQSYGFQPTNGVGYQPYRVVLSFELLHAPATVCGPKKSTNLVKNKCVN  
FNFNGLTGTGVLTESNKKFLPFQQFGRDIADTTDAVRDPQTEILDITPCSFGGVSVITP  
GTNTSNQVAVLYQGVNCTEVPVAIHADQLTPTWRVYSTGNSVFQTRAGCLIGAEHVNSY  
ECDIPIGAGICASYQTQTNRRRARSVASQSI IAYTMSLGAENSVAYSNNNSIAIPTNFTI  
SVTTEILPVSMTKTSVDCTMYICGDSTECNNLLQYGSFCTQLNRALTGIAVEQDKNTQE  
VFAQVKQIYKTPPIKDFGGFNFSQILPDPSKPSKRSFIEDLLFNKVTLADAGFIKQYGDC  
LGDIAARDLICAQKFNGLTVLPPLLTDEMIAQYTSALLAGTITSGWTFGAGAALQIPFAM  
QMAYRFNGIGVTQNVLYENQKLIANQFNSAIGKIQDSLSTASALGKLQXVVNQNAQALN  
TLVKQLSSNFGAISSVLNDILSRLDKVEAEVQIDRLITGRLQSLQTYVTQQILIRAAEIRA  
SANLAATKMSECVLQSKRVDFCGKGYHLSFPPQSAPHGVVFLHVTYVPAQEKNFTTAPA  
ICHDGKAHFPREGVFSNGTHWFVTQRNFYEPQIITDNTFVSGNCDVVI GIVNNTVYDP  
XQPELDSFKEELDKYFKNHTSPDVLGDISGINASVUNIQKEIDRLNEVAKNLNESLIDL  
QELGKYEQYIKWPWYIWLGFIAGLIAIVMVTIMLCCMTSCCCLKGCCSCGSCCKFDEDD  
SEPVKGVKLYHT

>lcl|MZ533381.1\_prot\_QXL06952.1\_3 [gene=S] [protein=surface glycoprotein]  
[protein\_id=QXL06952.1] [location=21533..25348] [gbkey=CDS]  
MFVFLVLLPLVSSQCVNLRTRTQLPPAYTNSFTRGVYYPDKVFRSSVLHSTQDLFLPFFS  
NVTWFHAIHVSGTNGTKRFDNPVLPFNDGVYFASIEESNIIRGWIFGTTLDSKTQSLLIV  
NNATNVVIKVCFEQFCNDPFLGVYYHKNNKSWMESG--VYSSANNCTFEYVSQPFLMDLE  
GKQGNFKNLREFVFKNIDGYFKIYSKHTPINLVRDLPQGFSALEPLVDLPIGINITRFQT  
LLALHRSYLT PGDSSSGWTAGAAAAYVGYLQPRTFLLKYNENGTITDAVDCALDPLSETK  
CTLKSFTVEKGIYQTSNFRVQPTESIVRFPNITNLCPFGEVFNATRFASVYAWNRRKRISN  
CVADYSVLVNSASFSTFKCYGVSPTKLNLDLCFTNVYADSFVIRGDEVRQIAPGQTGKIAD  
YNYKLPDDFTGCVIAWNSNNLDSKVGGNYNRYRRLFRKSNLKPFERDI STEIYQAGSKPC  
NGVEGFNCYFPLQSYGFQPTNGVGYQPYRVVLSFELLHAPATVCGPKKSTNLVKNKCVN  
FNFNGLTGTGVLTESNKKFLPFQQFGRDIADTTDAVRDPQTEILDITPCSFGGVSVITP  
GTNTSNQVAVLYQGVNCTEVPVAIHADQLTPTWRVYSTGNSVFQTRAGCLIGAEHVNSY  
ECDIPIGAGICASYQTQTNRRRARSVASQSI IAYTMSLGAENSVAYSNNNSIAIPTNFTI  
SVTTEILPVSMTKTSVDCTMYICGDSTECNNLLQYGSFCTQLNRALTGIAVEQDKNTQE  
VFAQVKQIYKTPPIKDFGGFNFSQILPDPSKPSKRSFIEDLLFNKVTLADAGFIKQYGDC  
LGDIAARDLICAQKFNGLTVLPPLLTDEMIAQYTSALLAGTITSGWTFGAGAALQIPFAM  
QMAYRFNGIGVTQNVLYENQKLIANQFNSAIGKIQDSLSTASALGKLQDVVNQNAQALN  
TLVKQLSSNFGAISSVLNDILSRLDKVEAEVQIDRLITGRLQSLQTYVTQQILIRAAEIRA  
SANLAATKMSECVLQSKRVDFCGKGYHLSFPPQSAPHGVVFLHVTYVPAQEKNFTTAPA  
ICHDGKAHFPREGVFSNGTHWFLTQRNFYEPQIITDNTFVSGNCDVVI GIVNNTVYDP  
LQPELDSFKEELDKYFKNHTSPDVLGDISGINASVINIQKEIDRLNEVAKNLNESLIDL  
QELGKYEQYIKWPWYIWLGFIAGLIAIVMVTIMLCCMTSCCCLKGCCSCGSCCKFDEDD  
SEPVKGVKLYHT

>lcl|MZ481924.1\_prot\_QXF28766.1\_3 [gene=S] [protein=surface glycoprotein]  
[protein\_id=QXF28766.1] [location=21509..25324] [gbkey=CDS]  
MFVFLVLLPLVSSQCVNLRTRTQLPPAYTNSFTRGVYYPDKVFRSSVLHSTQDLFLPFFS  
NVTWFHAIHVSGTNGTKRFDNPVLPFNDGVYFASIEESNIIRGWIFGTTLDSKTQSLLIV  
NNATNVVIKVCFEQFCNDPFLGVYYHKNNKSWMESG--VYSSANNCTFEYVSQPFLMDLE  
GKQGNFKNLREFVFKNIDGYFKIYSKHTPINLVRDLPQGFSALEPLVDLPIGINITRFQT  
LLALHRSYLT PGDSSSGWTAGAAAAYVGYLQPRTFLLKYNENGTITDAVDCALDPLSETK  
CTLKSFTVEKGIYQTSNFRVQPTESIVRFPNITNLCPFGEVFNATRFASVYAWNRRKRISN  
CVADYSVLVNSASFSTFKCYGVSPTKLNLDLCFTNVYADSFVIRGDEVRQIAPGQTGKIAD  
YNYKLPDDFTGCVIAWNSNNLDSKVGGNYNRYRRLFRKSNLKPFERDI STEIYQAGSKPC  
NGVEGFNCYFPLQSYGFQPTNGVGYQPYRVVLSFELLHAPATVCGPKKSTNLVKNKCVN  
FNFNGLTGTGVLTESNKKFLPFQQFGRDIADTTDAVRDPQTEILDITPCSFGGVSVITP  
GTNTSNQVAVLYQGVNCTEVPVAIHADQLTPTWRVYSTGNSVFQTRAGCLIGAEHVNSY  
ECDIPIGAGICASYQTQTNRRRARSVASQSI IAYTMSLGAENSVAYSNNNSIAIPTNFTI

SVTTEILPVSMTKTSVDCTMYICGDSTECNSNLLLQYGSFCTQLNRALTGIAVEQDKNTQE  
VFAQVKQIYKTPPIKDFGGFNFSQILPDPSKPSKRSFIEDLLFNKVTLADAGFIKQYGDC  
LGDIAARDLICAQKFNGLTVLPPLLTDEMIAQYTSALLAGTITSGWTFGAGAALQIPFAM  
QMAYRFNGIGVTONVLYENQKLIANQFNSAIGKIQDSLSTASALGKLOXVVNQNAQALN  
TLVKQLSSNFGAISSVLNDILSRDKVEAEVQIDRLITGRLQSLQTYVTQQLIRAAEIRA  
SANLAATKMSECVLGQSKRVDFCGKGYHLSFPPQSAPHGVVFLHVTVYVPAQEKNFTTAPA  
ICHGKAHFPREGVFNSTHWFVTRQNFYEPQIITDNTFVSGNCDVVI GIVNNTVYDP  
LQPELDSFKEELDKYFKNHTSPDVLGDISGINASVVNIQKEIDRLNEVAKNLNESLIDL  
QELGKYEQYIKWPWYIWLGFIAGLIAIVMVTIMLCCMTSCCSCLKGCCSCGSCCKFDEDD  
SEPVKGVKHLHYT

>lcl|MZ557555.1\_prot\_QXN17387.1\_3 [gene=S] [protein=surface glycoprotein]  
[protein\_id=QXN17387.1] [location=21509..25324] [gbkey=CDS]  
MFVFLVLLPLVSSQCVNLRTRTQLPPAYTNSFTRGVYYPDKVFRSSVLHSTQDLFLPFFS  
NVTWFHAIHVSNGTKRFDNPVLPFNDGVYFASTEKSNIIRGWIFGTTLDSTQSLIV  
NNATNVVIKVECFQFCNDPFLXVYYHKNKSWMESG--VYSSANNCTFEYVSQPFMLDLE  
GKQGNFNKLRREFVFNIDGYFKIYSKHTPINLVRYLPQGFSVLEPLVDLPIGINITRFQT  
LLALHRSYLTPGDSSSGWTAGAAAYVGYLQPRTFLLKYNENGTITDAVDCALDPLSETK  
CTLKSFTVEKGIYQTSNFRVQPTESIVRFPNITNLCPFGEVFNATRFASVYAWNRRKRISN  
CVADYSVLVNSASFSTFKCYGVSPTKLNLDLFCFTNVYADSFVIRGDEVQRQIAPGQTGKIAD  
YNYKLPDDFTGCVIAWNSNLDLSDKVGNYNYRYRFRKSNLKPFERDISTEIQAGSKPC  
NGVEGFNCYFPLQSYGFQPTNGVGYQPYRVVLSFELLHAPATVCGPKKSTNLVKNKCVN  
FNFNGLTGTGVLTESNKKFLPFQFGRDIADTTDAVRDPQTLEILDITPCSFGGVSVITP  
GTNTSNQVAVLYQGVNCTEVPVAIHADQLTPTWRVYSTGNSVVFQTRAGCLIGAEHVNSY  
ECDIPGAGICASYQTQTNRRRARSVASQSI IAYTMSLGAENSVAYSNNIAIPTNFTI  
SVTTEILPVSMTKTSVDCTMYICGDSTECNSNLLLQYGSFCTQLNRALTGIAVEQDKNTQE  
VFAQVKQIYKTPPIKDFGGFNFSQILPDPSKPSKRSFIEDLLFNKVTLADAGFIKQYGDC  
LGDIAARDLICAQKFNGLTVLPPLLTDEMIAQYTSALLAGTITSGWTFGAGAALQIPFAM  
QMAYRFNGIGVTONVLYENQKLIANQFNSAIGKIQDSLSTASALGKLOBVVNQNAQALN  
TLVKQLSSNFGAISSVLNDILSRDKVEAEVQIDRLITGRLQSLQTYVTQQLIRAAEIRA  
SANLAATKMSECVLGQSKRVDFCGKGYHLSFPPQSAPHGVVFLHVTVYVPAQEKNFTTAPA  
ICHGKAHFPREGVFNSTHWFVTRQNFYEPQIITDNTFVSGNCDVVI GIVNNTVYDP  
LQPELDSFKEELDKYFKNHTSPDVLGDISGINASVVNIQKEIDRLNEVAKNLNESLIDL  
QELGKYEQYIKWPWYIWLGFIAGLIAIVMVTIMLCCMTSCCSCLKGCCSCGSCCKFDEDD  
SEPVKGVKHLHYT

>lcl|MZ378046.1\_prot\_QWQ01366.1\_3 [gene=S] [protein=surface glycoprotein]  
[protein\_id=QWQ01366.1] [location=21561..25376] [gbkey=CDS]  
MFVFLVLLPLVSSQCVNLRTRTQLPPAYTNSFTRGVYYPDKVFRSSVLHSTQDLFLPFFS  
NVTWFHAIHVSNGTKRFDNPVLPFNDGVYFASTEKSNIIRGWIFGTTLDSTQSLIV  
NNATNVVIKVECFQFCNDPFLXVYYHKNKSWXESG--VYSSANNCTFEYVSQPFMLDLE  
GKQGNFNKLRREFVFNIDGYFKIYSKHTPINLVRLDPQGFSVLEPLVDLPIGINITRFQT  
LLALHRSYLTPGDSSSGWTAGAAAYVGYLQPRTFLLKYNENGTITDAVDCALDPLSETK  
CTLKSFTVEKGIYQTSNFRVQPTESIVRFPNITNLCPFGEVFNATRFASVYAWNRRKRISN  
CVADYSVLVNSASFSTFKCYGVSPTKLNLDLFCFTNVYADSFVIRGDEVQRQIAPGQTGKIAD  
YNYKLPDDFTGCVIAWNSNLDLSDKVGNYNYRYRFRKSNLKPFERDISTEIQAGSKPC  
NGVEGFNCYFPLQSYGFQPTNGVGYQPYRVVLSFELLHAPATVCGPKKSTNLVKNKCVN  
FNFNGLTGTGVLTESNKKFLPFQFGRDIADTTDAVRDPQTLEILDITPCSFGGVSVITP  
GTNTSNQVAVLYQGVNCTEVPVAIHADQLTPTWRVYSTGNSVVFQTRAGCLIGAEHVNSY  
ECDIPGAGICASYQTQTNRRRARSVASQSI IAYTMSLGAENSVAYSNNIAIPTNFTI  
SVTTEILPVSMTKTSVDCTMYICGDSTECNSNLLLQYGSFCTQLNRALTGIAVEQDKNTQE  
VFAQVKQIYKTPPIKDFGGFNFSQILPDPSKPSKRSFIEDLLFNKVTLADAGFIKQYGDC  
LGDIAARDLICAQKFNGLTVLPPLLTDEMIAQYTSALLAGTITSGWTFGAGAALQIPFAM  
QMAYRFNGIGVTONVLYENQKLIANQFNSAIGKIQDSLSTASALGKLOBVVNQNAQALN  
TLVKQLSSNFGAISSVLNDILSRDKVEAEVQIDRLITGRLQSLQTYVTQQLIRAAEIRA  
SANLAATKMSECVLGQSKRVDFCGKGYHLSFPPQSAPHGVVFLHVTVYVPAQEKNFTTAPA  
ICHGKAHFPREGVFNSTHWFVTRQNFYEPQIITDNTFVSGNCDVVI GIVNNTVYDP  
LQPELDSFKEELDKYFKNHTSPDVLGDISGINASVVNIQKEIDRLNEVAKNLNESLIDL  
QELGKYEQYIKWPWYIWLGFIAGLIAIVMVTIMLCCMTSCCSCLKGCCSCGSCCKFDEDD  
SEPVKGVKHLHYT

>lcl|MZ533166.1\_prot\_QXL04484.1\_3 [gene=S] [protein=surface glycoprotein]  
[protein\_id=QXL04484.1] [location=21533..25348] [gbkey=CDS]  
MFVFLVLLPLVSSQCVNLRTRTQLPPAYTNSFTRGVYYPDKVFRSSVLHSTQDLFLPFFS  
NVTWFHAIHVSNGTNGTKRFDNPVLPFNDGVYFASTEKSNIIRGWIFGTTLDSKTQSLIV  
NNATNVVIKVFCEFCNDPFLGVYHKNKSWMESG--VYSSANNCTFEYVSQPFLMDLE  
GKQGNFKNREFVFKNIDGYFKIYSKHTPINLVHDLPOGFSALEPLVDLPIGINITRFQT  
LLALHRSYLTPGDSSSGWTAGAAAYVGYLQPRTFLLKYNENGTITDAVDCALDPLSETK  
CTLKSFTVEKGIYQTSNFRVQPTESIVRFPNITNLCPFGVEFNATRFASVYAWNRRKRISN  
CVADYSVLVNSASFSTFKCYGVSPTKLNLDLFCFTNVYADSFVIRGDEVRQIAPGQTGKIAD  
YNYKLPDDFTGCVIAWNSNNLDSKVGNGYNYRYRLFRKSNLKPFERDISTEIQAGSKPC  
NGVEGFNCYFPLQSYGFQPTNGVGYQPYRVVLSFELLHAPATVCGPKKSTNLVKNKCVN  
FNFENGLTGTGVLTESNKKFLPFQQFGRDIADTTDAVRDPQTLEILDITPCSFGGVSVITP  
GTNTSNQVAVLYQGVNCTEVPVAIHADQLTPTWRVYSTGNSNVFQTRAGCLIGAEHVNSY  
ECDIPIGAGICASYQTQTNRRRARSVASQSI IAYTMSLGAENSVAYSNNIAIPTNFTI  
SVTTEILPVSMTKTSVDCTMYICGDSTECNLLLQYGSFCTQLNRALTGIAVEQDKNTQE  
VFAQVKQIYKTPPIKDFGGFNFSQILPDPSKPSKRSFIEDLLFNKVTLADAGFIKQYGC  
LGDIAARDLICAQKFNGLTVLPPLLTDEMIAQYTSALLAGTITSGWTFGAGAALQIPFAM  
QMAYRFNGIGVTQNVLYENQKLIANQFNSAIGKIQDSLSTASALGKLQDVVNQNAQALN  
TLVKQLSSNFGAISSVLNDILSRDLKVEAEVQIDRLITGRLQSLQTYVTQQILIRAAEIRA  
SANLAATKMSECVLQSKRVDFCGKGYHLMSPQSAPHGVVFLHVTYVPAQEKNFTTAPA  
ICRDGKAHFPREGVFVSNNGTHWFVTQRNFYEPQIITDNTFVSGNCDVVIQVNVNTVYDP  
LQPELDSFKEELDKYFKNHTSPDVLGDISGINASVVNIQKEIDRLNEVAKNLNESLIDL  
QELGKYEQYIKWPWYIWLGFIAGLIAIVMVTIMLCCMTSCCCLKGCCSCGSCCKFDEDD  
SEPVKLGVKLHYT

>lcl|MZ377434.1\_prot\_QWP94043.1\_3 [gene=S] [protein=surface glycoprotein]  
[protein\_id=QWP94043.1] [location=21558..25373] [gbkey=CDS]  
MFVFLVLLPLVSSQCVNLRTRTQLPPAYTNSFTRGVYYPDKVFRSSVLHSTQDLFLPFFS  
NVTWFHAIHVSNGTNGTKRFDNPVLPFNDGVYFASIEKSNIIRGWIFGTTLDSKTQSLIV  
NNATNVVIKVFCEFCNDPFLXVYHKNKSWMESG--VYSSANNCTFEYVSQPFLMDLE  
GKQGNFKNREFVFKNIDGYFKIYSKHTPINLVRDLPOGFSALEPLVDLPIGINITRFQT  
LLALHRSYLTPGDSSSGWTAGAAAYVGYLQPRTFLLKYNENGTITDAVDCALDPLSETK  
CTLKSFTVEKGIYQTSNFRVQPTESIVRFPNITNLCPFGVEFNATRFASVYAWNRRKRISN  
CVADYSVLVNSASFSTFKCYGVSPTKLNLDLFCFTNVYADSFVIRGDEVRQIAPGQTGKIAD  
YNYKLPDDFTGCVIAWNSNNLDSKVGNGYNYRYRLFRKSNLKPFERDISTEIQAGSKPC  
NGVEGFNCYFPLQSYGFQPTNGVGYQPYRVVLSFELLHAPATVCGPKKSTNLVKNKCVN  
FNFENGLTGTGVLTESNKKFLPFQQFGRDIADTTDAVRDPQTLEILDITPCSFGGVSVITP  
GTNTSNQVAVLYQGVNCTEVPVAIHADQLTPTWRVYSTGNSNVFQTRAGCLIGAEHVNSY  
ECDIPIGAGICASYQTQTNRRRARSVASQSI IAYTMSLGAENSVAYSNNIAIPTNFTI  
SVTTEILPVSMTKTSVDCTMYICGDSTECNLLLQYGSFCTQLNRALTGIAVEQDKNTQE  
VFAQVKQIYKTPPIKDFGGFNFSQILPDPSKPSKRSFIEDLLFNKVTLADAGFIKQYGC  
LGDIAARDLICAQKFNGLTVLPPLLTDEMIAQYTSALLAGTITSGWTFGAGAALQIPFAM  
QMAYRFNGIGVTQNVLYENQKLIANQFNSAIGKIQDSLSTASALGKLQBVVNQNAQALN  
TLVKQLSSNFGAISSVLNDILSRDLKVEAEVQIDRLITGRLQSLQTYVTQQILIRAAEIRA  
SANLAATKMSECVLQSKRVDFCGKGYHLMSPQSAPHGVVFLHVTYVPAQEKNFTTAPA  
ICHGKAHFPREGVFVSNNGTHWFVTQRNFYEPQIITDNTFVSGNCDVVIQVNVNTVYDP  
LQPELDSFKEELDKYFKNHTSPDVLGDISGINASVVNIQKEIDRLNEVAKNLNESLIDL  
QELGKYEQYIKWPWYIWLGFIAGLIAIVMVTIMLCCMTSCCCLKGCCSCGSCCKFDEDD  
SEPVKLGVKLHYT

>lcl|MZ377447.1\_prot\_QWP94198.1\_3 [gene=S] [protein=surface glycoprotein]  
[protein\_id=QWP94198.1] [location=21561..25376] [gbkey=CDS]  
MFVFLVLLPLVSSQCVNLRTRTQLPPAYTNSFTRGVYYPDKVFRSSVLHSTQDLFLPFFS  
NVTWFHAIHVSNGTNGTKRFDNPVLPFNDGVYFASIEKSNIIRGWIFGTTLDSKTQSLIV  
NNATNVVIKVFCEFCNDPFLXVYHKNKSWMESG--VYSSANNCTFEYVSQPFLMDLE  
GKQGNFKNREFVFKNIDGYFKIYSKHTPINLVRDLPOGFSALEPLVDLPIGINITRFQT  
LLALHRSYLTPGDSSSGWTAGAAAYVGYLQPRTFLLKYNENGTITDAVDCALDPLSETK  
CTLKSFTVEKGIYQTSNFRVQPTESIVRFPNITNLCPFGVEFNATRFASVYAWNRRKRISN  
CVADYSVLVNSASFSTFKCYGVSPTKLNLDLFCFTNVYADSFVIRGDEVRQIAPGQTGKIAD  
YNYKLPDDFTGCVIAWNSNNLDSKVGNGYNYRYRLFRKSNLKPFERDISTEIQAGSKPC

NGVEGFNCYFPLQSYGFQPTNGVGYQPYRVVVLSEFELLHAPATVCGPKKSTNLVKNKCVN  
FNFNGLTGTGVLTESENKKFLPFQQFGRDIADTTDAVRDPQTEILDITPCSFGGVSVITP  
GTNTSNQVAVLYQGVNCTEVPVAIHADQLTPTWRVYSTGSNVFQTRAGCLIGAHEVNNNSY  
ECDIPIGAGICASYQTQTNRRRARSVASQSI IAYTMSLGAENSVAYSNNNSIAIPTNFTI  
SVTTEILPVSMKTSTVDCTMYICGDSTECNSLLLQYGSFCTQLNRALTGIAVEQDKNTQE  
VFAQVKQIYKTPPIKDFGGFNFSQILPDPSKPSKRSFIEDLLFNKVTLADAGFIKQYGDC  
LGDIAARDLICAQKFNGLTVLPPLLTDEMIAQYTSALLAGTITSGWTFGAGAALQIPFAM  
QMAYRFNGIGVTONVLYENQKLIANQFNSAIGKIQDSLSTASALGKLQBVVNQNAQALN  
TLVKQLSSNFGAISSVLDILSRLDKVEAEVQIDRLITGRLQSLQTYVTQQILIRAAEIRA  
SANLAATKMSECVLGQSKRVDFCGKGYHLMSFPQSAPHGVVFLHVTVYVPAQEKNFTTAPA  
ICHGKAHFPREGVFSVNGTHWFVTQRNFYEPQIITDNTFVSGNCDVVIGIVNNTVYDP  
LQPELDSFKEELDKYFKNHTSPDVLGDISGINASVVNIQKEIDRLNEVAKNLNESLIDL  
QELGKYEQYIKWPWYIWLGFIAGLIAIVMVTIMLCCMTSCCSCLKGCCSCGSCCKFDEDD  
SEPVKLGVKLHYT

>lcl|MZ378038.1\_prot\_QW01272.1\_3 [gene=S] [protein=surface glycoprotein]  
[protein\_id=QW01272.1] [location=21548..25363] [gbkey=CDS]  
MFVFLVLLPLVSSQCVNLRTRTQLPPAYTNSFTRGVYYPDKVFRSSVLHSTQDLFLPFFS  
NVTWFHAIHVSNGTNGTKRFDNPVLPFNDGVYFASTEKSNIRGWIFGTTLDLSDKTSQSLIV  
NNATNVVIKVECFQFCNDPFLXVYYHKNKSWMESG--VYSSANNCTFEYVSQPFMDLE  
GKQGNFNKLRREFVFKNIDGYFKIYSKHTPINLVRDLPQGFSALEPLVDLPIGINITRFQT  
LLALHRSYLTPGDSSSGWTAGAAAYVGYLQPRTFLLKYNENGTITDAVDCALDPLSETK  
CTLKSFTVEKGIYQTSNFRVQPTESIVRFPNITNLCPFGEVFNATRFASVYAWNRRKRISN  
CVADYSVLVNSASFSTFKCYGVSPTKLNLDLCTNVYADS FVIRGDEVQRQIAPGQTGKIAD  
YNYKLPDDFTGCVIAWNSNNLDSKVGNYNYRYRLFRKSNLKPFERDISTEIQAGSKPC  
NGVEGFNCYFPLQSYGFQPTNGVGYQPYRVVVLSEFELLHAPATVCGPKKSTNLVKNKCVN  
FNFNGLTGTGVLTESENKKFLPFQQFGRDIADTTDAVRDPQTEILDITPCSFGGVSVITP  
GTNTSNQVAVLYQGVNCTEVPVAIHADQLTPTWRVYSTGSNVFQTRAGCLIGAHEVNNNSY  
ECDIPIGAGICASYQTQTNRRRARSVASQSI IAYTMSLGAENSVAYSNNNSIAIPTNFTI  
SVTTEILPVSMKTSTVDCTMYICGDSTECNSLLLQYGSFCTQLNRALTGIAVEQDKNTQE  
VFAQVKQIYKTPPIKDFGGFNFSQILPDPSKPSKRSFIEDLLFNKVTLADAGFIKQYGDC  
LGDIAARDLICAQKFNGLTVLPPLLTDEMIAQYTSALLAGTITSGWTFGAGAALQIPFAM  
QMAYRFNGIGVTONVLYENQKLIANQFNSAIGKIQDSLSTASALGKLQBVVNQNAQALN  
TLVKQLSSNFGAISSVLDILSRLDKVEAEVQIDRLITGRLQSLQTYVTQQILIRAAEIRA  
SANLAATKMSECVLGQSKRVDFCGKGYHLMSFPQSAPHGVVFLHVTVYVPAQEKNFTTAPA  
ICHGKAHFPREGVFSVNGTHWFVTQRNFYEPQIITDNTFVSGNCDVVIGIVNNTVYDP  
WQPELDSFKEELDKYFKNHTSPDVLGDISGINASVVNIQKEIDRLNEVAKNLNESLIDL  
QELGKYEQYIKWPWYIWLGFIAGLIAIVMVTIMLCCMTSCCSCLKGCCSCGSCCKFDEDD  
SEPVKLGVKLHYT

>lcl|MZ340546.1\_prot\_QWE52394.1\_3 [gene=S] [protein=surface glycoprotein]  
[protein\_id=QWE52394.1] [location=21513..25328] [gbkey=CDS]  
MFVFLVLLPLVSSQCVNLTTRTRLPPAYTNSFTRGVYYPDKVFRSSVLHSTQDLFLPFFS  
NVTWFHAIHVSNGTNGTKRFDNPVLPFNDGVYFASTEKSNIRGWIFGTTLDLSDKTSQSLIV  
NNATNVVIKVECFQFCNDPFLGVYYHKNKSWMESG--VYSSANNCTFEYVSQPFMDLE  
GKQGNFNKLRREFVFKNIDGYFKIYSKHTPINLVRDLPQGFSALEPLVDLPIGINITRFQT  
LLALHRSYLTPGDSSSGWTAGAAAYVGYLQPRTFLLKYNENGTITDAVDCALDPLSETK  
CTLKSFTVEKGIYQTSNFRVQPTESIVRFPNITNLCPFGEVFNATRFASVYAWNRRKRISN  
CVADYSVLVNSASFSTFKCYGVSPTKLNLDLCTNVYADS FVIRGDEVQRQIAPGQTGKIAD  
YNYKLPDDFTGCVIAWNSNNLDSKVGNYNYRYRLFRKSNLKPFERDISTEIQAGSKPC  
NGVEGFNCYFPLQSYGFQPTNGVGYQPYRVVVLSEFELLHAPATVCGPKKSTNLVKNKCVN  
FNFNGLTGTGVLTESENKKFLPFQQFGRDIADTTDAVRDPQTEILDITPCSFGGVSVITP  
GTNTSNQVAVLYQGVNCTEVPVAIHADQLTPTWRVYSTGSNVFQTRAGCLIGAHEVNNNSY  
ECDIPIGAGICASYQTQTNRRRARSVASQSI IAYTMSLGAENSVAYSNNNSIAIPTNFTI  
SVTTEILPVSMKTSTVDCTMYICGDSTECNSLLLQYGSFCTQLNRALTGIAVEQDKNTQE  
VFAQVKQIYKTPPIKDFGGFNFSQILPDPSKPSKRSFIEDLLFNKVTLADAGFIKQYGDC  
LGDIAARDLICAQKFNGLTVLPPLLTDEMIAQYTSALLAGTITSGWTFGAGAALQIPFAM  
QMAYRFNGIGVTONVLYENQKLIANQFNSAIGKIQDSLSTASALGKLQDVVNQNAQALN  
TLVKQLSSNFGAISSVLDILSRLDKVEAEVQIDRLITGRLQSLQTYVTQQILIRAAEIRA  
SANLAATKMSECVLGQSKRVDFCGKGYHLMSFPQSAPHGVVFLHVTVYVPAQEKNFTTAPA

ICHDGKAHFPREGV FVSN GTHWFVTQRNFYEPQIIITDNTFVSGNCDVVIGIVNNTVYDP  
LQPELDSFKEELDKYFKNHTSPDVDLGDISGINASVVNIQKEIDRLNEVAKNLNESLIDL  
QELGKYEQYIKWPWYIWLGFIAGLIAIVMVTIMLCCMTSCCCLKGCCSCGSCCKFDEDD  
SEPV LKGVKLHYT

>lcl|MZ342589.1\_prot\_QWE75884.1\_3 [gene=S] [protein=surface glycoprotein]  
[protein\_id=QWE75884.1] [location=21513..25328] [gbkey=CDS]  
MFVFLVLLPLVSSQCVNLRTRTQLPPAYTNSFTRGVYYPDKVFRSSVLHSTQDLFLPFFS  
NVTWFHAIHVS GTNGTKRFDNPVLPFNDGVYFAS TEKSNIIRGWIFGTTLDSKTQSLLIV  
NNATNVVIK VCFQFCNDPFLDVYYHKNNKSWMESG--VYSSANNCTFEYVSQPF LMDLE  
GKQGNFKNLREFVFKNIDGYFKIYSKHTPINLVRDLPQGF SVLEPLVDLPIGINITRFQT  
LLALHRSYLTPGDSSSGWTAGAAAYVGYLQPRTFLLKYNENGTITDAVDCALDPLSETK  
CTLKSFTVEKGIYQTSNFRVQPTESIVRFPNITNLCPFGEVFNATRFASVYAWNRRKRISN  
CVADYSVLVNSASFSTFKCYGVSPTKLNLDLCFTNVYADSFVIRGDEVRQIAPGQTGKIAD  
YNYKLPDDFTGCVIAWNSNNLDSKVG GNYRYR LFRKSNLKP FERDISTEIQAGSKPC  
NGVEGFNCYFPLQSYGFQPTYGVGYQPYRVVLSFELLHAPATVCGPKKSTNLVKNKCVN  
FNFENGLTGTGVLTESNKKFLPFQGFGRDIADTTDAVRDPQTLEILDITPCSFGGVS VITP  
GTNTSNQVAVLYQGVNCTEVPVAIHADQLTPTWRVYSTG SNVFQTRAGCLIGA EHVNNSY  
ECDIPIGAGICASYQTQTNSRRRARSVASQSI IAYTMSLGAENSVAYSNN SIAIPTNFTI  
SVTTEILPVSMTKTSVDCTMYICGDSTECSNLLLQYGSFCTQLNRALTGIAVEQDKNTQE  
VFAQVKQIYKTPPIKDFGGFNFSQILPDPSKPSKRSFIEDLLFNKVT LADAGFIKQY GDC  
LGDIAARDLICAQKFNGLTVLPPLLTDEMIAQYTSALLAGTITSGWTFGAGAALQIPFAM  
QMAYRFNGIGVTQNVLYENQKLIANQFN SAIGKIQDSL SASTASALGKLQDVVNQNAQALN  
TLVKQLSSNFGAISSVLNDILSR LDKVEAEVQIDRLITGRLQSLQTYVTQQLIRAAEIRA  
SANLAATKMSECVLGQSKRVDFCGKGYHLSFPPQSAPHGVVFLHVTYVPAQEKNFTTAPA  
ICHDGKAHFPREGV FVSN GTHWFVTQRNFYEPQIIITDNTFVSGNCDVVIGIVNNTVYDP  
LQPELDSFKEELDKYFKNHTSPDVDLGDISGINASVVNIQKEIDRLNEVAKNLNESLIDL  
QELGKYEQYIKWPWYIWLGFIAGLIAIVMVTIMLCCMTSCCCLKGCCSCGSCCKFDEDD  
SEPV LKGVKLHYT

>lcl|MZ397911.1\_prot\_QWT29649.1\_3 [gene=S] [protein=surface glycoprotein]  
[protein\_id=QWT29649.1] [location=21513..25328] [gbkey=CDS]  
MFVFLVLLPLVSSQCVNLRTRTQLPPAYTNSFTRGVYYPDKVFRSSVLHSTQDLFLPFFS  
NVTWFHAIHVS GTNGTKRFDNPVLPFNDGVYFAS TEKSNIIRGWIFGTTLDSKTQSLLIV  
NNATNVVIK VCFQFCNDPFLGVYYHKNNKSWMESG--VYSSANNCTFEYVSQPF LMDLE  
GKQGNFKNLREFVFKNIDGYFKIYSKHTPINLVRDLPQGF SVLEPLVDLPIGINITRFQT  
LLALHRSYLTPGDSSSGWTAGAAAYVGYLQPRTFLLKYNENGTITDAVDCALDPLSETK  
CTLKSFTVEKGIYQTSNFRVQPTESIVRFPNITNLCPFGEVFNATRFASVYAWNRRKRISN  
CVADYSVLVNSASFSTFKCYGVSPTKLNLDLCFTNVYADSFVIRGDEVRQIAPGQTGKIAD  
YNYKLPDDFTGCVIAWNSNNLDSKVG GNYRYR LFRKSNLKP FERDISTEIQAGSKPC  
NGVEGFNCYFPLQSYGFQPTNGVGYQPYRVVLSFELLHAPATVCGPKKSTNLVKNKCVN  
FNFENGLTGTGVLTESNKKFLPFQGFGRDIADTTDAVRDPQTLEILDITPCSFGGVS VITP  
GTNTSNQVAVLYQGVNCTEVPVAIHADQLTPTWRVYSTG SNVFQTRAGCLIGA EHVNNSY  
ECDIPIGAGICASYQTQTNSPRRARSVASQSI IAYTMSLGAENSVAYSNN SIAIPTNFTI  
SVTTEILPVSMTKTSVDCTMYICGDSTECSNLLLQYGSFCTQLNRALTGIAVEQDKNTQE  
VFAQVKQIYKTPPIKDFGGFNFSQILPDPSKPSKRSFIEDLLFNKVT LADAGFIKQY GDC  
LGDIAARDLICAQKFNGLTVLPPLLTDEMIAQYTSALLAGTITSGWTFGAGAALQIPFAM  
QMAYRFNGIGVTQNVLYENQKLIANQFN SAIGKIQDSL SASTASALGKLQDVVNQNAQALN  
TLVKQLSSNFGAISSVLNDILSR LDKVEAEVQIDRLITGRLQSLQTYVTQQLIRAAEIRA  
SANLAATKMSECVLGQSKRVDFCGKGYHLSFPPQSAPHGVVFLHVTYVPAHEKNFTTAPA  
ICHDGKAHFPREGV FVSN GTHWFVTQRNFYEPQIIITDNTFVSGNCDVVIGIVNNTVYDP  
LQPELDSFKEELDKYFKNHTSPDVDLGDISGINASVVNIQKEIDRLNEVAKNLNESLIDL  
QELGKYEQYIKWPWYIWLGFIAGLIAIVMVTIMLCCMTSCCCLKGCCSCGSCCKFDEDD  
SEPV LKGVKLHYT

>lcl|MZ533441.1\_prot\_QXL07635.1\_3 [gene=S] [protein=surface glycoprotein]  
[protein\_id=QXL07635.1] [location=21533..25348] [gbkey=CDS]  
MFVFLVLLPLVSSQCVNLRTRTQLPPAYTNSFTRGVYYPDKVFRSSVLHSTQDLFLPFFS  
NVTWFHAIHVS GTNGTKRFDNPVLPFNDGVYFAS IEKSNIIRGWIFGTTLDSKTQSLLIV  
NNATNVVIK VCFQFCNDPFLGVYYHKNNKSWMESG--VYSSANNCTFEYVSQPF LMDLE  
GKQGNFKNLREFVFKNIDGYFKIYSKHTPINLVRDLPQGFSALEPLVDLPIGINITRFQT

LLALHRSYLTPGDSSSGWTAGAAAYVGYLQPRTFLLKYNENGTITDAVDCALDPLSETK  
CTLKSFTVEKGIYQTSNFRVQPTESIVRFPNITNLCPFGEVFNATRFASVYAWNRRKRISN  
CVADYSVLVNSASFSTFKCYGVSPTKLNLDLCFTNVYADSFVIRGDEVRQIAPGQTGKIAD  
YNYKLPDDFTGCVIAWNSNNLDSKVGGNYNRYRRLFRKSNLKPFERDI STEIYQAGSKPC  
NGVEGFNCYFPLQSYGFQPTNGVGYQPYRVVLSFELLHAPATVCGPKKSTNLVKNKCVN  
FNFNGLTGTGVLTESNKKFLPFQQFGRDIADTTDAVRDPQTEILDITPCSFGGVSVITP  
GTNTSNQVAVLYQGVNCTEVPVAIHADQLTPTWRVYSTGSNVFQTRAGCLIGAEHVNSY  
ECDIPIGAGICASYQTQTNRRRARSVASQSI IAYTMSLGAENSVAYSNNSIAIPTNFTI  
SVTTEILPVSMTKTSVDCTMYICGDSTECNLLLQYGSFCTQLNRALTGIAVEQDKNTQE  
VFAQVKQIYKTPPIKDFGGFNFSQILPDPSKPSKRSFIEDLLFNKVTLADAGFIKQYGDC  
LGDIAARDLICAQKFNGLTVLPPLTTYEMIAQYTSALLAGTITSGWTFGAGAALQIPFAM  
QMAYRFNGIGVTQNVLYENQKLIANQFNSAIGKIQDSLSSTASALGKLQDVVNQNAQALN  
TLVKQLSSNFGAISSVLNDILSRLDKVEAEVQIDRLITGRLQSLQTYVTQQILIRAAEIRA  
SANLAATKMSECVLQSKRVDFCGKGYHLSFPPQSAPHGVVFLHVTVYVPAQEKNFTTAPA  
ICHDGKAHFPREGVFSNGTHWFVTQRNFYEPQIITDNTFVSGNCDVVI GIVNNTVYDP  
LQPELDSFKEELDKYFKNHTSPDVLGDISGINASVVNIQKEIDRLNEVAKNLNESLIDL  
QELGKYEQYIKWPWYIWLGFIAGLIAIVMVTIMLCCMTSCCCLKGCCSCGSCCKFDEDD  
SEPVLKGVKLHYT

>lcl|MZ101179.1\_prot\_QUS79665.1\_3 [gene=S] [protein=surface glycoprotein]  
[protein\_id=QUS79665.1] [location=21533..25348] [gbkey=CDS]  
MFVFLVLLPLVSSQCVNLRTRTQLPPAYTNSFTRGVYYPDKVFRSSVLHSTQDLFLPFFS  
NVTWFHAIHVSGTNGTKRFDNPVLPFNDGVYFASIEKSNIRGWIFGTTLDSKTQSLIIV  
NNATNVVIKVCFFQFCNDPFLGVYHKNKSWMESG--VYSSANNCTFEYVSQPFLLMDLE  
GKQGNFKNLREFVFKNIDGYFKIYSKHTPINLVRDLDPQGFSALEPLVDLPIGINITRFQT  
LLALHRSYLTPGDSSSGWTAGAAAYVGYLQPRTFLLKYNENGTITDAVDCALDPLSETK  
CTLKSFTVEKGIYQTSNFRVQPTESIVRFPNITNLCPFGEVFNATRFASVYAWNRRKRISN  
CVADYSVLVNSASFSTFKCYGVSPTKLNLDLCFTNVYADSFVIRGDEVRQIAPGQTGKIAD  
YNYKLPDDFTGCVIAWNSNNLDSKVGGNYNRYRRLFRKSNLKPFERDI STEIYQAGSKPC  
NGVEGFNCYFPLQSYGFQPTNGVGYQPYRVVLSFELLHAPATVCGPKKSTNLVKNKCVN  
FNFNGLTGTGVLTESNKKFLPFQQFGRDIADTTDAVRDPQTEILDITPCSFGGVSVITP  
GTNTSNQVAVLYQGVNCTEVPVAIHADQLTPTWRVYSTGSNVFQTRAGCLIGAEHVNSY  
ECDIPIGAGICASYQTQTNRRRARSVASQSI IAYTMSLGAENSVAYSNNSIAIPTNFTI  
SVTTEILPVSMTKTSVDCTMYICGDSTECNLLLQYGSFCTQLNRALTGIAVEQDKNTQE  
VFAQVKQIYKTPPIKDFGGFNFSQILPDPSKPSKRSFIEDLLFNKVTLADAGFIKQYGDC  
LGDIAARDLICAQKFNGLTVLPPLTTDEMIAQYTSALLAGTITSGWTFGAGAALQIPFAM  
QMAYRFNGIGVTQNVLYENQKLIANQFNSAIGKIQDSLSSTASALGKLQDVVNQNAQALN  
TLVKQLSSNFGAISSVLNDILSRLDKVEAEVQIDRLITGRLQSLQTYVTQQILIRAAEIRA  
SANLAATKMSECVLQSKRVDFCGKGYHLSFPPQSAPHGVVFLHVTVYVPAQEKNFTTAPA  
ICHDGKAHFPREGVFSNGTHWFVTQRNFYEPQIITDNTFVSGNCDVVI GIVNNTVYDP  
LQPELDSFKEELDKYFKNHTSPDVLGDISGINASVVNIQKEIDRLNEVAKNLNESLIDL  
QELGKYEQYIKWPWYIWLGFIAGLIAIVMVTIMLCCMTSCCCLKGCCSCGSCCKFDEDD  
SEPVLKGVKLHYT

>lcl|MZ533231.1\_prot\_QXL05237.1\_3 [gene=S] [protein=surface glycoprotein]  
[protein\_id=QXL05237.1] [location=21533..25348] [gbkey=CDS]  
MFVFLVLLPLVSSQCVNLRTRTQLPPAYTNSFTRGVYYPDKVFRSSVLHSTQDLFLPFFS  
NVTWFHAIHVSGTNGTKRFDNPVLPFNDGVYFASIEKSNIRGWIFGTTLDSKTQSLIIV  
NNATNVVIKVCFFQFCNDPFLGVYHKNKSWMESG--VYSSANNCTFEYVSQPFLLMDLE  
GKQGNFKNLREFVFKNIDGYFKIYSKHTPINLVRDLDPQGFSALEPLVDLPIGINITRFQT  
LLALHRSYLTPGDSSSGWTAGAAAYVGYLQPRTFLLKYNENGTITDAVDCALDPLSETK  
CTLKSFTVEKGIYQTSNFRVQPTESIVRFPNITNLCPFGEVFNATRFASVYAWNRRKRISN  
CVADYSVLVNSASFSTFKCYGVSPTKLNLDLCFTNVYADSFVIRGDEVRQIAPGQTGKIAD  
YNYKLPDDFTGCVIAWNSNNLDSKVGGNYNRYRRLFRKSNLKPFERDI STEIYQAGSKPC  
NGVEGFNCYFPLQSYGFQPTNGVGYQPYRVVLSFELLHAPATVCGPKKSTNLVKNKCVN  
FNFNGLTGTGVLTESNKKFLPFQQFGRDIADTTDAVRDPQTEILDITPCSFGGVSVITP  
GTNTSNQVAVLYQGVNCTEVPVAIHADQLTPTWRVYSTGSNVFQTRAGCLIGAEHVNSY  
ECDIPIGAGICASYQTQTNRRRARSVASQSI IAYTMSLGAENSVAYSNNSIAIPTNFTI  
SVTTEILPVSMTKTSVDCTMYICGDSTECNLLLQYGSFCTQLNRALTGIAVEQDKNTQE  
VFAQVKQIYKTPPIKDFGGFNFSQILPDPSKPSKRSFIEDLLFNKVTLADAGFIKQYGDC



LGDIAARDLICAQKFNGLTVLPPLLTDEMIAQYTSALLAGTITSGWTFGAGAALQIPFAM  
QMA YRFNGIGVTONVLYENQKLIANQFN SAIGKIQDSLSTASALGKLQDVVNQNAQALN  
TLVKQLSSNFGAISSVLNDILSR LDKVEAEVQIDRLITGRLQSLQTYVTQQLIRAAEIRA  
SANLAATKMSECVLGQSKRVDFCGKGYHLSFPPQSAPHGVVFLHVTVYVPAQEKNFTTAPA  
ICH DGKAHFPREGVFVSN GTHWFVTQRNFYEPQIITDNTFVSGNCDVVI GIVNNTVYDP  
LQPELDSFKEELDKYFKNHTSPD VDLGDISGINASVVNIQKEIDRLNEVAKNLNESLIDL  
QELGKYEQYIKWPWYIWLGF IAGLIAIVMVTIMLCCMTSCCSCLKGCCSCGSCCKFDEDD  
SEPV LKGVKLHYT

>lcl|MZ533325.1\_prot\_QXL06312.1\_3 [gene=S] [protein=surface glycoprotein]  
[protein\_id=QXL06312.1] [location=21533..25348] [gbkey=CDS]  
MFVFLVLLPLVSSQCVNLRTRTQLPPAYTNSFTRGVYYPDKVFRSSVLHSTQDLFLPFFS  
NVTWFHAIHVS G TNGTKRFDNPVLPFNDGVYFASIEKSNIRGWIFGTTLDSKTQSL LIV  
NNATNVVIK VCE FQFCNDPFLGVYYHKNNKSWMESG--VYSSANNCTFEYVSQPF LMDLE  
GKQGNFKNLREFVFKNIDGYFKIYSKHTPINLVRDLPQGFSALEPLVDLPIGINITRFQT  
LLALHRSYLTPGDSSSGW TAGAAAYVGYLQPRTFLLKYNENGTITDAVDCALDPLSETK  
CTLKSFTVEKGIYQTSNFRVQPTESIVRFPNITNLCPFGEVFNATRFASVYAWNRRKRISN  
CVADYSVL YNSASFSTFKCYGVSPTKLNLDLCFTNVYADSFVIRGDEV RQIAPGQTGKIAD  
YNYKLPDDFTGCVIAWNSNNLDSKVG GNYNYRYRLFRKSNLKPFERDISTE IYQAGSKPC  
NGVEGFNCYFPLQSYGFQPTNGVGYQPYRVVLSFELLHAPATVCGPKKSTNLVKNKCVN  
FNFNGLTGTGVLTESNKKFLPFQ QFGRDIADTTDAVRDPQTLEILDITPCSFGGVS VITP  
GTNTSNQVAVLYQGVNCTEVPVAIHADQLTPTWRVYSTG SNVFQTRAGCLIGA EHVNNSY  
ECDIPIGAGICASYQTQTNSRRRARSVASQSI IAYTMSLGAENSVAYSNN SIAIPTNFTI  
SVTTEILPVSMTKTSVDCTMYICGDSTEC SNLLLQYGSFCTQLNRALTGIAVEQDKNTQE  
VFAQVKQIYKTPPIKDFGGFNFSQILPDPSKPSKRSFIEDLLFNKVTLADAGFIKQY GDC  
LGDIAARDLICAQKFNGLTVLPPLLTDEMIAQYTSALLAGTITSGWTFGAGAALQIPFAM  
QMA YRFNGIGVTONVLYENQKLIANQFN SAIGKIQDSLSTASALGKLQDVVNQNAQALN  
TLVKQLSSNFGAISSVLNDILSR LDKVEAEVQIDRLITGRLQSLQTYVTQQLIRAAEIRA  
SANLAATKMSECVLGQSKRVDFCGKGYHLSFPPQSAPHGVVFLHVTVYVPAQEKNFTTAPA  
ICH DGKAHFPREGVFVSN GTHWFVTQRNFYEPQIITDNTFVSGNCDVVI GIVNNTVYDP  
LQPELDSFKEELDKYFKNHTSPD VDLGDISGINASVVNIQKEIDRLNEVAKNLNESLIDL  
QELGKYEQYIKWPWYIWLGF IAGLIAIVMVTIMLCCMTSCCSCLKGCCSCGSCCKFDEDD  
SEPV LKGVKLHYT

>lcl|MZ533538.1\_prot\_QXL08740.1\_3 [gene=S] [protein=surface glycoprotein]  
[protein\_id=QXL08740.1] [location=21533..25348] [gbkey=CDS]  
MFVFLVLLPLVSSQCVNLRTRTQLPPAYTNSFTRGVYYPDKVFRSSVLHSTQDLFLPFFS  
NVTWFHAIHVS G TNGTTRFDNPVLPFNDGVYFASTEKSNIRGWIFGTTLDSKTQSL LIV  
NNATNVVIK VCE FQFCNDPFLGVYYHKNNKSWMESG--VYSSANNCTFEYVSQPF LMDLE  
GKQGNFKNLREFVFKNIDGYFKIYSKHTPINLVRDLPQGFSALEPLVDLPIGINITRFQT  
LLALHRSYLTPGDSSSGW TAGAAAYVGYLQPRTFLLKYNENGTITDAVDCALDPLSETK  
CTLKSFTVEKGIYQTSNFRVQPTESIVRFPNITNLCPFGEVFNATRFASVYAWNRRKRISN  
CVADYSVL YNSASFSTFKCYGVSPTKLNLDLCFTNVYADSFVIRGDEV RQIAPGQTGKIAD  
YNYKLPDDFTGCVIAWNSNNLDSKVG GNYNYRYRLFRKSNLKPFERDISTE IYQAGSKPC  
NGVEGFNCYFPLQSYGFQPTNGVGYQPYRVVLSFELLHAPATVCGPKKSTNLVKNKCVN  
FNFNGLTGTGVLTESNKKFLPFQ QFGRDIADTTDAVRDPQTLEILDITPCSFGGVS VITP  
GTNTSNQVAVLYQGVNCTEVPVAIHADQLTPTWRVYSTG SNVFQTRAGCLIGA EHVNNSY  
ECDIPIGAGICASYQTQTNSRRRARSVASQSI IAYTMSLGAENSVAYSNN SIAIPTNFTI  
SVTTEILPVSMTKTSVDCTMYICGDSTEC SNLLLQYGSFCTQLNRALTGIAVEQDKNTQE  
VFAQVKQIYKTPPIKDFGGFNFSQILPDPSKPSKRSFIEDLLFNKVTLADAGFIKQY GDC  
LGDIAARDLICAQKFNGLTVLPPLLTDEMIAQYTSALLAGTITSGWTFGAGAALQIPFAM  
QMA YRFNGIGVTONVLYENQKLIANQFN SAIGKIQDSLSTASALGKLQDVVNQNAQALN  
TLVKQLSSNFGAISSVLNDILSR LDKVEAEVQIDRLITGRLQSLQTYVTQQLIRAAEIRA  
SANLAATKMSECVLGQSKRVDFCGKGYHLSFPPQSAPHGVVFLHVTVYVPAQEKNFTTAPA  
ICH DGKAHFPREGVFVSN GTHWFVTQRNFYEPQIITDNTFVSGNCDVVI GIVNNTVYDP  
LQPELDSFKEELDKYFKNHTSPD VDLGDISGINASVVNIQKEIDRLNEVAKNLNESLIDL  
QELGKYEQYIKWPWYIWLGF IAGLIAIVMVTIMLCCMTSCCSCLKGCCSCGSCCKFDEDD  
SEPV LKGVKLHYT

>lcl|MZ537305.1\_prot\_QXL50994.1\_3 [gene=S] [protein=surface glycoprotein]  
[protein\_id=QXL50994.1] [location=21524..25339] [gbkey=CDS]

MFVFLVLLPLVSSQCVNLRTRTQLPPAYTNSFTRGVYYPDKVFRSSVLHSTQDLFLPFFS  
NVTWFHAIHVSNGTNGTRFDNPVLPFNDGVYFASTEKSNIIRGWIFGTTLDSKTQSLLIV  
NNATNVVIKVCFFQFCNDPFLGVYHKNKSWMESG--VYSSANNCTFEYVSQPFMDLE  
GKQGNFKNLREFVFKNIDGYFKIYSKHTPINLVRDLPQGFSALEPLVDLPIGINITRFQT  
LLALHRSYLT PGDSSSGWTAGAAAYVGYLQPRTFLLKYNENGTITDAVDCALDPLSETK  
CTLKSFTVEKGIYQTSNFRVQPTESIVRFPNITNLCPFGEVFNATRFASVYAWNRRKRISN  
CVADYSVLVNSASFSTFKCYGVSPTKLNLDLFCFTNVYADSFVIRGDEVRQIAPGQTGKIAD  
YNYKLPDDFTGCVIAWNSNLDLSDKVGNGYNYRYRLFRKSNLKPFERDITSTEIYQAGSKPC  
NGVQGFNCYFPLQSYGFQPTNGVGYQPYRVVLSFELLHAPATVCGPKKSTNLVKNKCVN  
FNFNGLTGTGVLTESNKKFLPFQQFGRDIADTTDAVRDPQTEILDITPCSFGGVSVITP  
GTNTSNQVAVLYQGVNCTEVPVAIHADQLTPTWRVYSTGNSVNFQTRAGCLIGAEHVNSY  
ECDIPIGAGICASYQTQTNSRRRARSVASQSI IAYTMSLGAENSVAYSNNIAIPTNFTI  
SVTTEILPVSMTKTSVDCTMYICGDSTECNLLLQYGSFCTQLNRALTGIAVEQDKNTQE  
VFAQVKQIYKTPPIKDFGGFNFSQILPDPSKPSKRSFIEDLLFNKVTLADAGFIKQYGDC  
LGDIAARDLICAQKFNGLTVLPPLLTDEMIAQYTSALLAGTITSGWTFGAGAALQIPFAM  
QMAYRFNGIGVTONVLYENQKLIANQFNLSAIGKIQDSLSTASALGKLQDVVNQNAQALN  
TLVKQLSSNFGAISSVLNDILSRLDKVEAEVQIDRLITGRLQSLQTYVTQQILIRAAEIRA  
SANLAATKMSECVLQSKRVDFCGKGYHLSMFPQSAPHGVVFLHVTYVPAQEKNFTTAPA  
ICHGKAHFPREGVFSNGTHWFVTQRNFYEPQIITDNTFVSGNCDVVI GIVNNTVYDP  
LQPELDSFKEELDKYFKNHTSPDVLGDISGINASVVNIQKEIDRLNEVAKNLNESLIDL  
QELGKYEQYIKWPWYIWLGFIAGLIAIVMVTIMLCCMTSCCCLKGCCSCGSCCKFDEDD  
SEPVKGVKLYHT

>lcl|MZ555950.1\_prot\_QXN15607.1\_3 [gene=S] [protein=surface glycoprotein]  
[protein\_id=QXN15607.1] [location=21561..25373] [gbkey=CDS]

MFVFLVLLPLVSSQCVNLRTRTQLPPAYTNSFTRGVYYPDKVFRSSVLHSTQDLFLPFFS  
NVTWFHAI--SGTNGTKRFDNPVLPFNDGVYFASTEKSNIIRGWIFGTTLDSKTQSLLIV  
NNATNVVIKVCFFQFCNDPFLGV--YHKNKSWMESEFRVYSSANNCTFEYVSQPFMDLE  
GKQGNFKNLREFVFKNIDGYFKIYSKHTPINLVRDLPQGFSALEPLVDLPIGINITRFQT  
LLALHRSYLT PGDSSSGWTAGAAAYVGYLQPRTFLLKYNENGTITDAVDCALDPLSETK  
CTLKSFTVEKGIYQTSNFRVQPTESIVRFPNITNLCPFGEVFNATRFASVYAWNRRKRISN  
CVADYSVLVNSASFSTFKCYGVSPTKLNLDLFCFTNVYADSFVIRGDEVRQIAPGQTGKIAD  
YNYKLPDDFTGCVIAWNSNLDLSDKVGNGYNYRYRLFRKSNLKPFERDITSTEIYQAGSKPC  
NGVEGFNCYFPLQSYGFQPTNGVGYQPYRVVLSFELLHAPATVCGPKKSTNLVKNKCVN  
FNFNGLTGTGVLTESNKKFLPFQQFGRDIADTTDAVRDPQTEILDITPCSFGGVSVITP  
GTNTSNQVAVLYQGVNCTEVPVAIHADQLTPTWRVYSTGNSVNFQTRAGCLIGAEHVNSY  
ECDIPIGAGICASYQTQTNSRRRARSVASQSI IAYTMSLGAENSVAYSNNIAIPTNFTI  
SVTTEILPVSMTKTSVDCTMYICGDSTECNLLLQYGSFCTQLNRALTGIAVEQDKNTQE  
VFAQVKQIYKTPPIKDFGGFNFSQILPDPSKPSKRSFIEDLLFNKVTLADAGFIKQYGDC  
LGDIAARDLICAQKFNGLTVLPPLLTDEMIAQYTSALLAGTITSGWTFGAGAALQIPFAM  
QMAYRFNGIGVTONVLYENQKLIANQFNLSAIGKIQDSLSTASALGKLQDVVNQNAQALN  
TLVKQLSSNFGAISSVLNDILSRLDKVEAEVQIDRLITGRLQSLQTYVTQQILIRAAEIRA  
SANLAATKMSECVLQSKRVDFCGKGYHLSMFPQSAPHGVVFLHVTYVPAQEKNFTTAPA  
ICHGKAHFPREGVFSNGTHWFVTQRNFYEPQIITDNTFVSGNCDVVI GIVNNTVYDP  
LQPELDSFKEELDKYFKNHTSPDVLGDISGINASVVNIQKEIDRLNEVAKNLNESLIDL  
QELGKYEQYIKWPWYIWLGFIAGLIAIVMVTIMLCCMTSCCCLKGCCSCGSCCKFDEDD  
SEPVKGVKLYHT

>lcl|MZ566362.1\_prot\_QX031728.1\_3 [gene=S] [protein=surface glycoprotein]  
[protein\_id=QX031728.1] [location=21533..25348] [gbkey=CDS]

MFVFLVLLPLVSSQCVNLRTRTQLPPAYTNSFTRGVYYPDKVFRSSVLHSTQDLFLPFFS  
NVTWFHAIHVSNGTNGTKRFDNPVLPFNDGVYFASTEKSNIIRGWIFGTTLDSKTQSLLIV  
NNATNVVIKVCFFQFCNDPFLGVYHKNKSWMESG--VYSSANNCTFEYVSQPFMDLE  
GKQGNFKNLREFVFKNIDGYFKIYSKHTPINLVRDLPQGFSALEPLVDLPIGINITRFQT  
LLALHRSYLT PGDSSSGWTAGAAAYVGYLQPRTFLLKYNENGTITDAVDCALDPLSETK  
CTLKSFTVEKGIYQTSNFRVQPTESIVRFPNITNLCPFGEVFNATRFASVYAWNRRKRISN  
CVADYSVLVNSASFSTFKCYGVSPTKLNLDLFCFTNVYADSFVIRGDEVRQIAPGQTGKIAD  
YNYKLPDDFTGCVIAWNSNLDLSDKVGNGYNYRYRLFRKSNLKPFERDITSTEIYQAGSKPC  
NGVEGFNCYFPLQSYGFQPTNGVGYQPYRVVLSFELLHAPATVCGPKKSTNLVKNKCVN  
FNFNGLTGTGVLTESNKKFLPFQQFGRDIADTTDAVRDPQTEILDITPCSFGGVSVITP

GTNTSNQVAVLYQGVNCTEVPVAIHADQLTPTWRVYSTGNSVFQTRAGCLIGAEHVNNSY  
ECDIPIGAGICASYQTQTNRRRARSVASQSI IAYTMSLGAENSVAYSNNSIAIPTNFTI  
SVTTEILPVSMKTSTVDCTMYICGDSTECNSLLLQYGSFCTQLNRALTGIAVEQDKNTQE  
VFAQVKQIYKTPSIKDFGGFNFSQILPDPSKPSKRSFIEDLLFNKVTLADAGFIKQYGDC  
LGDIAARDLICAQKFNGLTVLPPLLTDEMIAQYTSALLAGTITSGWTFGAGAALQIPFAM  
QMAYRFNGIGVTONVLYENQKLIANQFNSAIGKIQDSLSTASALGKLQDVVNQNAQALN  
TLVKQLSSNFGAISSVLNDILSRDLKVEAEVQIDRLITGRLQSLQTYVTQQLIRAAEIRA  
SANLAATKMSECVLQSKRVDFCGKGYHLMSFPQSAPHGVVFLHVTYVPAQEKNFTTAPA  
ICHGKAHFPREGVFVSNGTHWFVTQRNFYEPQIITDNTFVSGNCDVVI GIVNNTVYDP  
LQPELDSFKEELDKYFKNHTSPDVLGDISGINASVVNIQKEIDRLNEVAKNLNESLIDL  
QELGKYEQYIKWPWYIWLGFIAGLIAIVMVTIMLCCMTSCCSCCKGCCCSCGSCCKFDEDD  
SEPVKGVKHLHYT

>lcl|MZ533394.1\_prot\_QXL07098.1\_3 [gene=S] [protein=surface glycoprotein]  
[protein\_id=QXL07098.1] [location=21533..25348] [gbkey=CDS]  
MFVFLVLLPLVSSQCVNLRTRTQLPPAYTNSFTRGVYYPDKVFRSSVLHSTQDLFLPFFS  
NVTWFHAIHVSGTNGTKRFDNPVLPFNDGVYFASTEKSNIIRGWIFGTTLDSTQSLIV  
NNATNVVIKVECFQFCNDPFLGVYHKNKSWMESG--VYSSANNCTFEYVSQPFMDLE  
GKQGNFNKLRFEVFKNIDGYFKIYSKHTPINLVRDLDPQGFSALEPLVDLPIGINITRFQT  
LLALHRSYLTPGDSSSGWTAGAAAYVGYLQPRTFLLKYNENGTITDAVDCALDPLSETK  
CTLKSFTVEKGIYQTSNFRVQPTESIVRFPNITNLCPFGEVFNATRFASVYAWNRRKRISN  
CVADYSVLVNSASFSTFKCYGVSPTKLNLDLCFTNVYADSFVIRGDEVQRQIAPGQTGKIAD  
YNYKLPDDFTGCVIAWNSNNLDSKVGNGYNYRYRLFRKSNLKPFERDISTEIQAGSKPC  
NGVEGFNCYFPLQSYGFQPTNGVGYQPYRVVLSFELLHAPATVCGPKKSTNLVKNKCVN  
FNFNGLTGTGVLTESNKKFLPFQFGRDIADTTDAVRDPQTLEILDITPCSFGGVSVITP  
GTNTSNQVAVLYQGVNCTEVPVAIHADQLTPTWRVYSTGNSVFQTRAGCLIGAEHVNNSY  
ECDIPIGAGICASYQTQTNRRRARSVASQSI IAYTMSLGAENSVAYSNNSIAIPTNFTI  
SVTTEILPVSMKTSTVDCTMYICGDSTECNSLLLQYGSFCTQLNRALTGIAVEQDKNTQE  
VFAQVKQIYKTPPIKDFGGFNFSQILPDPSKPSKRSFIEDLLFNKVTLADAGFIKQYGDC  
LGDIAARDLICAQKFNGLTVLPPLLTDEMIAQYTSALLAGTITSGWTFGAGAALQIPFAM  
QMAYRFNGIGVTONVLYENQKLIANQFNSAIGKIQDSLSTASALGKLQDVVNQNAQALN  
TLVKQLSSNFGAISSVLNDILSRDLKVEAEVQIDRLITGRLQSLQTYVTQQLIRAAEIRA  
SANLAATKMSECVLQSKRVDFCGKGYHLMSFPQSAPHGVVFLHVTYVPAQEKNFTTAPA  
ICHGKAHFPREGVFVSNGTHWFVTQRNFYEPQIITDNTFVSGNCDVVI GIVNNTVYDP  
LQPELDSFKEELDKYFKNHTSPDVLGDISGINASVVNIQKEIDRLNEVAKNLNESLIDL  
QELGKYEQYIKWPWYIWLGFIAGLIAIVMVTIMLCCMTSCCSCCKGCCCSCGSCCKFDEDD  
SEPVKGVKHLHYT

>lcl|MZ533492.1\_prot\_QXL08215.1\_3 [gene=S] [protein=surface glycoprotein]  
[protein\_id=QXL08215.1] [location=21533..25348] [gbkey=CDS]  
MFVFLVLLPLVSSQCVNLRTRTQLPPAYTNSFTRGVYYPDKVFRSSVLHSTQDLFLPFFS  
NVTWFHAIHVSGTNGTKRFDNPVLPFNDGVYFASTEKSNIIRGWIFGTTLDSTQSLIV  
NNATNVVIKVECFQFCNDPFLGVYHKNKSWMESG--VYSSANNCTFEYVSQPFMDLE  
GKQGNFNKLRFEVFKNIDGYFKIYSKHTPINLVRDLDPQGFSALEPLVDLPIGINITRFQT  
LLALHRSYLTPGDSSSGWTAGAAAYVGYLQPRTFLLKYNENGTITDAVDCALDPLSETK  
CTLKSFTVEKGIYQTSNFRVQPTESIVRFPNITNLCPFGEVFNATRFASVYAWNRRKRISN  
CVADYSVLVNSASFSTFKCYGVSPTKLNLDLCFTNVYADSFVIRGDEVQRQIAPGQTGKIAD  
YNYKLPDDFTGCVIAWNSNNLDSKVGNGYNYRYRLFRKSNLKPFERDISTEIQAGSKPC  
NGVEGFNCYFPLQSYGFQPTNGVGYQPYRVVLSFELLHAPATVCGPKKSTNLVKNKCVN  
FNFNGLTGTGVLTESNKKFLPFQFGRDIADTTDAVRDPQTLEILDITPCSFGGVSVITP  
GTNTSNQVAVLYQGVNCTEVPVAIHADQLTPTWRVYSTGNSVFQTRAGCLIGAEHVNNSY  
ECDIPIGAGICASYQTQTNRRRARSVASQSI IAYTMSLGAENSVAYSNNSIAIPTNFTI  
SVTTEILPVSMKTSTVDCTMYICGDSTECNSLLLQYGSFCTQLNRALTGIAVEQDKNTQE  
VFAQVKQIYKTPPIKDFGGFNFSQILPDPSKPSKRSFIEDLLFNKVTLADAGFIKQYGDC  
LGDIAARDLICAQKFNGLTVLPPLLTDEMIAQYTSALLAGTITSGWTFGAGAALQIPFAM  
QMAYRFNGIGVTONVLYENQKLIANQFNSAIGKIQDSLSTASALGKLQDVVNQNAQALN  
TLVKQLSSNFGAISSVLNDILSRDLKVEAEVQIDRLITGRLQSLQTYVTQQLIRAAEIRA  
SANLAATKMSECVLQSKRVDFCGKGYHLMSFPQSAPHGVVFLHVTYVPAQEKNFTTAPA  
ICHGKAHFPREGVFVSNGTHWFVTQRNFYEPQIITDNTFVSGNCDVVI GIVNNTVYDP  
LQPELDSFKEELDKYFKNHTSPDVLGDISGINASVVNIQKEIDRLNEVAKNLNESLIDL

QELGKYEQYIKWPWYIWLGFIAGLIAIVMVTIMLCCMTSCCSFLKGCCSCGSCCKFDEDD  
SEPVLLKGVKLHYT

>lcl|MZ185717.1\_prot\_QVG23056.1\_3 [gene=S] [protein=surface glycoprotein]  
[protein\_id=QVG23056.1] [location=21554..25369] [gbkey=CDS]  
MFVFLVLLPLVSSQCVNLRTRTQLPPAYTNSFTRGVYYPDKVFRSSVLHSTQDLFLPFFS  
NVTWFHAIHVSNGTNGTKRFDNPVLPFNDGVYFASSTKSNIRGWIFGTTLDLSDKTSQSLIV  
NNATNVVIKVFCEFCNDPFLGVYHKNKSWMESG--VYSSANNCTFEYVSQPFLLMDLE  
GKQGNFKNLREFVFKNIDGYFKIYSKHTPINLVRDLPQGFSALEPLVDLPIGINITRFQT  
LLALHRSYLTPGDSSSGWTAGAAAYVGYLQPRTFLLKYNENGTITDAVDCALDPLSETK  
CTLKSFTVEKGIYQTSNFRVQPTESIVRFPNITNLCPFGEVFNATRFASVYAWNRRKRISN  
CVADYSVLVNSASFSTFKCYGVSPTKLNLDLFCFTNVYADSFVIRGDEVRQIAPGQTGKIAD  
YNYKLPDDFTGCVIAWNSNNLDSKVGGNYNRYRFLFRKSNLKPFERDISTEIQAGSKPC  
NGVEGFNCYFPLQSYGFQPTNGVGYQPYRVVLSFELLHAPATVCGPKKSTNLVKNKCVN  
FNFNGLTGTGVLTESNKKFLPFQFGRDIADTTDAVRDPQTLEILDITPCSFGGVSVITP  
GTNTSNQVAVLYQGVNCTEVPVAIHADQLTPTWRVYSTGNSNVFQTRAGCLIGAEHVNSY  
ECDIPIGAGICASYQTQTSNRRRARSVASQSI IAYTMSLGAENSVAYSNNIAIPTNFTI  
SVTTEILPVSMTKTSVDCTMYICGDSTECNLLLQYGSFCTQLNRALTGIAVEQDKNTQE  
VFAQVKQIYKTPPIKDFGGFNFSQILPDPSKPSKRSFIEDLLFNKVTLADAGFIKQYGDC  
LGDIAARDLICAQKFNGLTVLPLLLTDEMIAQYTSALLAGTITSGWTFGAGAALQIPFAM  
QMAYRFNGIGVTQNVLYENQKLIANQFNSAIGKIQDSLSTASALGKLQDVVNQNAQALN  
TLVKQLSSNFGAISSVLNDILSRLDKVEAEVQIDRLITGRLQSLQTYVTQQILIRAAEIRA  
SANLAATKMSECVLQSKRVDFCGKGYHLSFPPQSAPHGVVFLHVTYVPAQEKNFTTAPA  
ICHGKAHFPREGVFSNGTHWFVTQRNFYEPQIITDNTFVSGNCDVVI GIVNNTVYDP  
LQPELDSFKEELDKYFKNHTSPDVLGDISGINASVVNIQKEIDRLNEVAKNLNESLIDL  
QELGKYEQYIKWPWYIWLGFIAGLIAIVMVTIMLCCMTSCCSCLKGCCSCGSCCKFDEDD  
SEPVLLKGVKLHYT

>lcl|MZ376486.1\_prot\_QWP87176.1\_3 [gene=S] [protein=surface glycoprotein]  
[protein\_id=QWP87176.1] [location=21561..25376] [gbkey=CDS]  
MFVFLVLLPLVSSQCVNLRTRTQLPPAYTNSFTRGVYYPDKVFRSSVLHSTQDLFLPFFS  
NVTWFHAIHVSNGTNGTKRFDNPVLPFNDGVYFASSTKSNIRGWIFGTTLDLSDKTSQSLIV  
NNATNVVIKVFCEFCNDPFLGVYHKNKSWMESG--VYSSANNCTFEYVSQPFLLMDLE  
GKQGNFKNLREFVFKNIDGYFKIYSKHTPINLVRDLPQGFSALEPLVDLPIGINITRFQT  
LLALHRSYLTPGDSSSGWTAGAAAYVGYLQPRTFLLKYNENGTITDAVDCALDPLSETK  
CTLKSFTVEKGIYQTSNFRVQPTESIVRFPNITNLCPFGEVFNATRFASVYAWNRRKRISN  
CVADYSVLVNSASFSTFKCYGVSPTKLNLDLFCFTNVYADSFVIRGDEVRQIAPGQTGKIAD  
YNYKLPDDFTGCVIAWNSNNLDSKVGGNYNRYRFLFRKSNLKPFERDISTEIQAGSKPC  
NGVEGFNCYFPLQSYGFQPTNGVGYQPYRVVLSFELLHAPATVCGPKKSTNLVKNKCVN  
FNFNGLTGTGVLTESNKKFLPFQFGRDIADTTDAVRDPQTLEILDITPCSFGGVSVITP  
GTNTSNQVAVLYQGVNCTEVPVAIHADQLTPTWRVYSTGNSNVFQTRAGCLIGAEHVNSY  
ECDIPIGAGICASYQTQTSNRRRARSVASQSI IAYTMSLGAENSVAYSNNIAIPTNFTI  
SVTTEILPVSMTKTSVDCTMYICGDSTECNLLLQYGSFCTQLNRALTGIAVEQDKNTQE  
VFAQVKQIYKTPPIKDFGGFNFSQILPDPSKPSKRSFIEDLLFNKVTLADAGFIKQYGDC  
LGDIAARDLICAQKFNGLTVLPLLLTDEMIAQYTSALLAGTITSGWTFGAGAALQIPFAM  
QMAYRFNGIGVTQNVLYENQKLIANQFNSAIGKIQDSLSTASALGKLQDVVNQNAQALN  
TLVKQLSSNFGAISSVLNDILSRLDKVEAEVQIDRLITGRLQSLQTYVTQQILIRAAEIRA  
SANLAATKMSECVLQSKRVDFCGKGYHLSFPPQSAPHGVVFLHVTYVPAQEKNFTTAPA  
ICHGKAHFPREGVFSNGTHWFVTQRNFYEPQIITDNTFVSGNCDVVI GIVNNTVYDP  
LQPELDSFKEELDKYFKNHTSPDVLGDISGINASVVNIQKEIDRLNEVAKNLNESLIDL  
QELGKYEQYIKWPWYIWLGFIAGLIAIVMVTIMLCCMTSCCSCLKGCCSCGSCCKFDEDD  
SEPVLLKGVKLHYT

>lcl|MZ386473.1\_prot\_QWQ76348.1\_3 [gene=S] [protein=surface glycoprotein]  
[protein\_id=QWQ76348.1] [location=21525..25340] [gbkey=CDS]  
MFVFLVLLPLVSSQCVNLRTRTQLPPAYTNSFTRGVYYPDKVFRSSVLHSTQDLFLPFFS  
NVTWFHAIHVSNGTNGTKRFDNPVLPFNDGVYFASSTKSNIRGWIFGTTLDLSDKTSQSLIV  
NNATNVVIKVFCEFCNDPFLGVYHKNKSWMESG--VYSSANNCTFEYVSQPFLLMDLE  
GKQGNFKNLREFVFKNIDGYFKIYSKHTPINLVRDLPQGFSALEPLVDLPIGINITRFQT  
LLALHRSYLTPGDSSSGWTAGAAAYVGYLQPRTFLLKYNENGTITDAVDCALDPLSETK  
CTLKSFTVEKGIYQTSNFRVQPTESIVRFPNITNLCPFGEVFNATRFASVYAWNRRKRISN

CVADYSVLVNSASFSTFKCYGVSPTKLNLDLCFTNVYADSFVIRGDEVQRQIAPGQTGKIAD  
YNYKLPDDFTGCVIAWNSNNLDSKVGGNYNRYRRLFRKSNLKPFFERDI STEIYQAGSKPC  
NGVEGFNCYFPLQSYGFQPTNGVGYQPYRVVLSFELLHAPATVCGPKKSTNLVKNKCVN  
FNFNGLTGTGVLTESNKKFLPFQQFGRDIADTTDAVRDPQTEILDITPCSFGGVSVITP  
GTNTSNQVAVLYQGVNCTEVPVAIHADQLTPTWRVYSTGSNVFQTRAGCLIGAHEVNNNSY  
ECDIPIGAGICASYQTQTNRRRARSVASQSI IAYTMSLGAENSVAYSNNNSIAIPTNFTI  
SVTTEILPVSMTKTSVDCTMYICGDSTECNLLLQYGSFCTQLNRALTGIAVEQDKNTQE  
VFAQVKQIYKTPPIKDFGGFNFSQILPDPSKPSKRSFIEDLLFNKVTLADAGFIKQYGDC  
LGDIAARDLICAQKFNGLTVLPPLLTDEMIAQYTSALLAGTITSGWTFGAGAALQIPFAM  
QMAYRFNGIGVTONVLYENQKLIANQFNNSAIGKIQDSLSTASALGKLQDVVNQNAQALN  
TLVKQLSSNFGAISSVLNDILSRLDKVEAEVQIDRLITGRLQSLQTYVTQQLIRAAEIRA  
SANLAATKMSECVLQSKRVDFCGKGYHLSMFPQSAPHGVVFLHVTVVPAQEKNFTTAPA  
ICHGKAHFPREGVFSNGTHWFVTQRNFYEPQIITTDNTFVSGNCDVVI GIVNNTVYDP  
LQPELDSFKEELDKYFKNHTSPDVLGDISGINASVVNIQKEIDRLNEVAKNLNESLIDL  
QELGKYEQYIKWPWYIWLGFIAGLIAIVMVTIMLCCMTSCCCLKGCCSCGSCCKFDEDD  
SEPVKGVKLYHT

>lcl|MZ450737.1\_prot\_QWY72596.1\_3 [gene=S] [protein=surface glycoprotein]

[protein\_id=QWY72596.1] [location=21533..25348] [gbkey=CDS]  
MFVFLVLLPLVSSQCVNLRTRTQLPPAYTNSFTRGVYYPDKVFRSSVLHSTQDLFLPFFS  
NVTWFHAIHVSGTNGTKRFDNPVLPFNDGVYFASTEKSNIIRGWIFGTTLDSTQSLIV  
NNATNVVIKVCFFQFCNDPFLGVYHKNKNSWMESG--VYSSANNCTFEYVSQPFMDLE  
GKQGNFKNLREFVFKNIDGYFKIYSKHTPINLVRDLPQGFSALEPLVDLPIGINITRFQT  
LLALHRSYLT PGDSSSGWTAGAAAYVGYLQPRTFLLKYNENGTITDAVDCALDPLSETK  
CTLKSFTVEKGIYQTSNFRVQPTESIVRFPNITNLCPFGEVFNATRFASVYAWNRRKRISN  
CVADYSVLVNSASFSTFKCYGVSPTKLNLDLCFTNVYADSFVIRGDEVQRQIAPGQTGKIAD  
YNYKLPDDFTGCVIAWNSNNLDSKVGGNYNRYRRLFRKSNLKPFFERDI STEIYQAGSKPC  
NGVEGFNCYFPLQSYGFQPTNGVGYQPYRVVLSFELLHAPATVCGPKKSTNLVKNKCVN  
FNFNGLTGTGVLTESNKKFLPFQQFGRDIADTTDAVRDPQTEILDITPCSFGGVSVITP  
GTNTSNQVAVLYQGVNCTEVPVAIHADQLTPTWRVYSTGSNVFQTRAGCLIGAHEVNNNSY  
ECDIPIGAGICASYQTQTNRRRARSVASQSI IAYTMSLGAENSVAYSNNNSIAIPTNFTI  
SVTTEILPVSMTKTSVDCTMYICGDSTECNLLLQYGSFCTQLNRALTGIAVEQDKNTQE  
VFAQVKQIYKTPPIKDFGGFNFSQILPDPSKPSKRSFIEDLLFNKVTLADAGFIKQYGDC  
LGDIAARDLICAQKFNGLTVLPPLLTDEMIAQYTSALLAGTITSGWTFGAGAALQIPFAM  
QMAYRFNGIGVTONVLYENQKLIANQFNNSAIGKIQDSLSTASALGKLQDVVNQNAQALN  
TLVKQLSSNFGAISSVLNDILSRLDKVEAEVQIDRLITGRLQSLQTYVTQQLIRAAEIRA  
SANLAATKMSECVLQSKRVDFCGKGYHLSMFPQSAPHGVVFLHVTVVPAQEKNFTTAPA  
ICHGKAHFPREGVFSNGTHWFVTQRNFYEPQIITTDNTFVSGNCDVVI GIVNNTVYDP  
LQPELDSFKEELDKYFKNHTSPDVLGDISGINASVVNIQKEIDRLNEVAKNLNESLIDL  
QELGKYEQYIKWPWYIWLGFIAGLIAIVMVTIMLCCMTSCCCLKGCCSCGSCCKFDEDD  
SEPVKGVKLYHT

>lcl|MZ533164.1\_prot\_QXL04461.1\_3 [gene=S] [protein=surface glycoprotein]

[protein\_id=QXL04461.1] [location=21533..25348] [gbkey=CDS]  
MFVFLVLLPLVSSQCVNLRTRTQLPPAYTNSFTRGVYYPDKVFRSSVLHSTQDLFLPFFS  
NVTWFHAIHVSGTNGTKRFDNPVLPFNDGVYFASTEKSNIIRGWIFGTTLDSTQSLIV  
NNATNVVIKVCFFQFCNDPFLGVYHKNKNSWMESG--VYSSANNCTFEYVSQPFMDLE  
GKQGNFKNLREFVFKNIDGYFKIYSKHTPINLVRDLPQGFSALEPLVDLPIGINITRFQT  
LLALHRSYLT PGDSSSGWTAGAAAYVGYLQPRTFLLKYNENGTITDAVDCALDPLSETK  
CTLKSFTVEKGIYQTSNFRVQPTESIVRFPNITNLCPFGEVFNATRFASVYAWNRRKRISN  
CVADYSVLVNSASFSTFKCYGVSPTKLNLDLCFTNVYADSFVIRGDEVQRQIAPGQTGKIAD  
YNYKLPDDFTGCVIAWNSNNLDSKVGGNYNRYRRLFRKSNLKPFFERDI STEIYQAGSKPC  
NGVEGFNCYFPLQSYGFQPTNGVGYQPYRVVLSFELLHAPATVCGPKKSTNLVKNKCVN  
FNFNGLTGTGVLTESNKKFLPFQQFGRDIADTTDAVRDPQTEILDITPCSFGGVSVITP  
GTNTSNQVAVLYQGVNCTEVPVAIHADQLTPTWRVYSTGSNVFQTRAGCLIGAHEVNNNSY  
ECDIPIGAGICASYQTQTNRRRARSVASQSI IAYTMSLGAENSVAYSNNNSIAIPTNFTI  
SVTTEILPVSMTKTSVDCTMYICGDSTECNLLLQYGSFCTQLNRALTGIAVEQDKNTQE  
VFAQVKQIYKTPPIKDFGGFNFSQILPDPSKPSKRSFIEDLLFNKVTLADAGFIKQYGDC  
LGDIAARDLICAQKFNGLTVLPPLLTDEMIAQYTSALLAGTITSGWTFGAGAALQIPFAM  
QMAYRFNGIGVTONVLYENQKLIANQFNNSAIGKIQDSLSTASALGKLQDVVNQNAQALN

TLVKQLSSNFGAISSVLNDILSRDKVEAEVQIDRLITGRLQSLQTYVTQQLIRAAEIRA  
SANLAATKMSECVLQGSKRVDFCGKGYHLSFPPQSAPHGVVFLHVTYVPAQEKNFTTAPA  
ICHGKAHFPREGVFSNGTHWFVTQRNFYEPQIITDNTFVSGNCDVVI GIVNNTVYDP  
LQPELDSFKEELDKYFKNHTSPDVDLGDISGINASVVNIQKEIDRLNEVAKNLNESLIDL  
QELGKYEQYIKWPWYIWLGFIAGLIAIVMVTIMLCCMTSCCSCLKGCCSCGSCCKFDEDD  
SEPVKGVKHLHYT

>lcl|MZ533179.1\_prot\_QXL04636.1\_3 [gene=S] [protein=surface glycoprotein]  
[protein\_id=QXL04636.1] [location=21533..25348] [gbkey=CDS]  
MFVFLVLLPLVSSQCVNLRTRTQLPPAYTNSFTRGVYYPDKVFRSSVLHSTQDLFLPFFS  
NVTWFHAIHVSNGTKRFDNPFVLPFNDGVYFASTEKSNIIRGWIFGTTLDSKTQSLIV  
NNATNVVIKVFQFCNDPFLGVYHKNKSWMESG--VYSSANNCTFEYVSQPFMDLE  
GKQGNFKNLREFVFKNIDGYFKIYSKHTPINLVRDLPPQGFSALEPLVDLPIGINITRFQT  
LLALHRSYLTPGDSSSGWTAGAAAYVGYLQPRTFLLKYNENGTITDAVDCALDPLSETK  
CTLKSFTVEKGIYQTSNFRVQPTESIVRFPNITNLCPFGEVFNATRFASVYAWNRRKRISN  
CVADYSVLVNSASFSTFKCYGVSPTKLNLDLFCFTNVYADSFVIRGDEVQRQIAPGQTGKIAD  
YNYKLPDDFTGCVIAWNSNNLDSKVGGNYNRYRFLFRKSNLKPFERDISTEIQAGSKPC  
NGVEGFNCYFPLQSYGFQPTNGVGYQPYRVVLSFELLHAPATVCGPKKSTNLVKNKCVN  
FNFNGLTGTGVLTESNKKFLPFQFGRDIADTTDAVRDPQTLLEILDITPCSFGGVSVITP  
GTNTSNQVAVLYQGVNCTEVPVAIHADQLTPTWRVYSTGNSVVFQTRAGCLIGAEHVNSY  
ECDIPIGAGICASYQTQTSNRRRARSVASQSI IAYTMSLGAENSVAYSNNNSIAIPTNFTI  
SVTTEILPVSMTKTSVDCTMYICGDSTECNSLLLQYGSFCTQLNRALTGIAVEQDKNTQE  
VFAQVKQIYKTPPIKDFGGFNFSQILPDPSKPSKRSFIEDLLFNKVTLADAGFIKQYGDC  
LGDIAARDLCAQKFNGLTVLPPLLTDEMIAQYTSALLAGTITSGWTFGAGAALQIPFAM  
QMAYRFNGIGVTONVLYENQKLIANQFNSAIGKIQDSLSTASALGKLQDVVNQNAQALN  
TLVKQLSSNFGAISSVLNDILSRDKVEAEVQIDRLITGRLQSLQTYVTQQLIRAAEIRA  
SANLAATKMSECVLQGSKRVDFCGKGYHLSFPPQSAPHGVVFLHVTYVPAQEKNFTTAPA  
ICHGKAHFPREGVFSNGTHWFVTQRNFYEPQIITDNTFVSGNCDVVI GIVNNTVYDP  
LQPELDSFKEELDKYFKNHTSPDVDLGDISGINASVVNIQKEIDRLNEVAKNLNESLIDL  
QELGKYEQYIKWPWYIWLGFIAGLIAIVMVTIMLCCMTSCCSCLKGCCSCGSCCKFDEDD  
SEPVKGVKHLHYT

>lcl|MZ533194.1\_prot\_QXL04807.1\_3 [gene=S] [protein=surface glycoprotein]  
[protein\_id=QXL04807.1] [location=21533..25348] [gbkey=CDS]  
MFVFLVLLPLVSSQCVNLRTRTQLPPAYTNSFTRGVYYPDKVFRSSVLHSTQDLFLPFFS  
NVTWFHAIHVSNGTKRFDNPFVLPFNDGVYFASTEKSNIIRGWIFGTTLDSKTQSLIV  
NNATNVVIKVFQFCNDPFLGVYHKNKSWMESG--VYSSANNCTFEYVSQPFMDLE  
GKQGNFKNLREFVFKNIDGYFKIYSKHTPINLVRDLPPQGFSALEPLVDLPIGINITRFQT  
LLALHRSYLTPGDSSSGWTAGAAAYVGYLQPRTFLLKYNENGTITDAVDCALDPLSETK  
CTLKSFTVEKGIYQTSNFRVQPTESIVRFPNITNLCPFGEVFNATRFASVYAWNRRKRISN  
CVADYSVLVNSASFSTFKCYGVSPTKLNLDLFCFTNVYADSFVIRGDEVQRQIAPGQTGKIAD  
YNYKLPDDFTGCVIAWNSNNLDSKVGGNYNRYRFLFRKSNLKPFERDISTEIQAGSKPC  
NGVEGFNCYFPLQSYGFQPTNGVGYQPYRVVLSFELLHAPATVCGPKKSTNLVKNKCVN  
FNFNGLTGTGVLTESNKKFLPFQFGRDIADTTDAVRDPQTLLEILDITPCSFGGVSVITP  
GTNTSNQVAVLYQGVNCTEVPVAIHADQLTPTWRVYSTGNSVVFQTRAGCLIGAEHVNSY  
ECDIPIGAGICASYQTQTSNRRRARSVASQSI IAYTMSLGAENSVAYSNNNSIAIPTNFTI  
SVTTEILPVSMTKTSVDCTMYICGDSTECNSLLLQYGSFCTQLNRALTGIAVEQDKNTQE  
VFAQVKQIYKTPPIKDFGGFNFSQILPDPSKPSKRSFIEDLLFNKVTLADAGFIKQYGDC  
LGDIAARDLCAQKFNGLTVLPPLLTDEMIAQYTSALLAGTITSGWTFGAGAALQIPFAM  
QMAYRFNGIGVTONVLYENQKLIANQFNSAIGKIQDSLSTASALGKLQDVVNQNAQALN  
TLVKQLSSNFGAISSVLNDILSRDKVEAEVQIDRLITGRLQSLQTYVTQQLIRAAEIRA  
SANLAATKMSECVLQGSKRVDFCGKGYHLSFPPQSAPHGVVFLHVTYVPAQEKNFTTAPA  
ICHGKAHFPREGVFSNGTHWFVTQRNFYEPQIITDNTFVSGNCDVVI GIVNNTVYDP  
LQPELDSFKEELDKYFKNHTSPDVDLGDISGINASVVNIQKEIDRLNEVAKNLNESLIDL  
QELGKYEQYIKWPWYIWLGFIAGLIAIVMVTIMLCCMTSCCSCLKGCCSCGSCCKFDEDD  
SEPVKGVKHLHYT

>lcl|MZ533226.1\_prot\_QXL05178.1\_3 [gene=S] [protein=surface glycoprotein]  
[protein\_id=QXL05178.1] [location=21533..25348] [gbkey=CDS]  
MFVFLVLLPLVSSQCVNLRTRTQLPPAYTNSFTRGVYYPDKVFRSSVLHSTQDLFLPFFS  
NVTWFHAIHVSNGTKRFDNPFVLPFNDGVYFASTEKSNIIRGWIFGTTLDSKTQSLIV

NNATNVVIKVCFEQFCNDPFLGVYYHKNNKSWMESG--VYSSANNCTFEYVSQPFLMDLE  
GKQGNFKNLREFVFKNIDGYFKIYSKHTPINLVRDLPQGFSALEPLVDLPIGINITRFQT  
LLALHRSYLT PGDSSSGWTAGAAAAYVGYLQPRTFLLKYNENGTITDAVDCALDPLSETK  
CTLKSFTVEKGIYQTSNFRVQPTESIVRFPNITNLCPFGEVFNATRFASVYAWNRRKRISN  
CVADYSVLVNSASFSTFKCYGVSPTKLNLDLCFTNVYADSFVIRGDEVRQIAPGQTGKIAD  
YNYKLPDDFTGCVIAWNSNNLDSKVGNYNYRYRLFRKSNLKPFERDI STEIYQAGSKPC  
NGVEGFNCYFPLQSYGFQPTNGVGYQPYRVVLSFELLHAPATVCGPKKSTNLVKNKCVN  
FNFNGLTGTGVLTESNKKFLPFQQFGRDIADTTDAVRDPQTEILDITPCSFGGVSVITP  
GTNTSNQVAVLYQGVNCTEVPVAIHADQLTPTWRVYSTGNSVFQTRAGCLIGAEHVNSY  
ECDIPIGAGICASYQTQTNRRRARSVASQSI IAYTMSLGAENSVAYSNNNSIAIPTNFTI  
SVTTEILPVSMTKTSVDCTMYICGDSTECNNLLQYGSFCTQLNRALTGIAVEQDKNTQE  
VFAQVKQIYKTPPIKDFGGFNFSQILPDPSKPSKRSFIEDLLFNKVTLADAGFIKQYGDC  
LGDIAARDLICAQKFNGLTVLPPLLTDEMIAQYTSALLAGTITSGWTFGAGAALQIPFAM  
QMAYRFNGIGVTONVLYENQKLIANQFNSAIGKIQDSLSTASALGKLQDVVNQNAQALN  
TLVKQLSSNFGAISSVLNDILSRLDKVEAEVQIDRLITGRLQSLQTYVTQQILIRAAEIRA  
SANLAATKMSECVLQSKRVDFCGKGYHLSFPQSAPHGVVFLHVTVVPAQEKNFTTAPA  
ICHDGKAHFPREGVFSNGTHWFVTQRNFYEPQIITDNTFVSGNCDVVI GIVNNTVYDP  
LQPELDSFKEELDKYFKNHTSPDVLGDISGINASVVNIQKEIDRLNEVAKNLNESLIDL  
QELGKYEQYIKWPWYIWLGFIAGLIAIVMVTIMLCCMTSCCCLKGCCSCGSCCKFDEDD  
SEPVKGVKLYHT

>lcl|MZ533268.1\_prot\_QXL05659.1\_3 [gene=S] [protein=surface glycoprotein]  
[protein\_id=QXL05659.1] [location=21533..25348] [gbkey=CDS]  
MFVFLVLLPLVSSQCVNLRTRTQLPPAYTNSFTRGVYYPDKVFRSSVLHSTQDLFLPFFS  
NVTWFHAIHVSGTNGTKRFDNPVLPFNDGVYFASTEKSNIRGWIFGTTLDSKTQSLLIV  
NNATNVVIKVCFEQFCNDPFLGVYYHKNNKSWMESG--VYSSANNCTFEYVSQPFLMDLE  
GKQGNFKNLREFVFKNIDGYFKIYSKHTPINLVRDLPQGFSALEPLVDLPIGINITRFQT  
LLALHRSYLT PGDSSSGWTAGAAAAYVGYLQPRTFLLKYNENGTITDAVDCALDPLSETK  
CTLKSFTVEKGIYQTSNFRVQPTESIVRFPNITNLCPFGEVFNATRFASVYAWNRRKRISN  
CVADYSVLVNSASFSTFKCYGVSPTKLNLDLCFTNVYADSFVIRGDEVRQIAPGQTGKIAD  
YNYKLPDDFTGCVIAWNSNNLDSKVGNYNYRYRLFRKSNLKPFERDI STEIYQAGSKPC  
NGVEGFNCYFPLQSYGFQPTNGVGYQPYRVVLSFELLHAPATVCGPKKSTNLVKNKCVN  
FNFNGLTGTGVLTESNKKFLPFQQFGRDIADTTDAVRDPQTEILDITPCSFGGVSVITP  
GTNTSNQVAVLYQGVNCTEVPVAIHADQLTPTWRVYSTGNSVFQTRAGCLIGAEHVNSY  
ECDIPIGAGICASYQTQTNRRRARSVASQSI IAYTMSLGAENSVAYSNNNSIAIPTNFTI  
SVTTEILPVSMTKTSVDCTMYICGDSTECNNLLQYGSFCTQLNRALTGIAVEQDKNTQE  
VFAQVKQIYKTPPIKDFGGFNFSQILPDPSKPSKRSFIEDLLFNKVTLADAGFIKQYGDC  
LGDIAARDLICAQKFNGLTVLPPLLTDEMIAQYTSALLAGTITSGWTFGAGAALQIPFAM  
QMAYRFNGIGVTONVLYENQKLIANQFNSAIGKIQDSLSTASALGKLQDVVNQNAQALN  
TLVKQLSSNFGAISSVLNDILSRLDKVEAEVQIDRLITGRLQSLQTYVTQQILIRAAEIRA  
SANLAATKMSECVLQSKRVDFCGKGYHLSFPQSAPHGVVFLHVTVVPAQEKNFTTAPA  
ICHDGKAHFPREGVFSNGTHWFVTQRNFYEPQIITDNTFVSGNCDVVI GIVNNTVYDP  
LQPELDSFKEELDKYFKNHTSPDVLGDISGINASVVNIQKEIDRLNEVAKNLNESLIDL  
QELGKYEQYIKWPWYIWLGFIAGLIAIVMVTIMLCCMTSCCCLKGCCSCGSCCKFDEDD  
SEPVKGVKLYHT

>lcl|MZ533300.1\_prot\_QXL06030.1\_3 [gene=S] [protein=surface glycoprotein]  
[protein\_id=QXL06030.1] [location=21533..25348] [gbkey=CDS]  
MFVFLVLLPLVSSQCVNLRTRTQLPPAYTNSFTRGVYYPDKVFRSSVLHSTQDLFLPFFS  
NVTWFHAIHVSGTNGTKRFDNPVLPFNDGVYFASTEKSNIRGWIFGTTLDSKTQSLLIV  
NNATNVVIKVCFEQFCNDPFLGVYYHKNNKSWMESG--VYSSANNCTFEYVSQPFLMDLE  
GKQGNFKNLREFVFKNIDGYFKIYSKHTPINLVRDLPQGFSALEPLVDLPIGINITRFQT  
LLALHRSYLT PGDSSSGWTAGAAAAYVGYLQPRTFLLKYNENGTITDAVDCALDPLSETK  
CTLKSFTVEKGIYQTSNFRVQPTESIVRFPNITNLCPFGEVFNATRFASVYAWNRRKRISN  
CVADYSVLVNSASFSTFKCYGVSPTKLNLDLCFTNVYADSFVIRGDEVRQIAPGQTGKIAD  
YNYKLPDDFTGCVIAWNSNNLDSKVGNYNYRYRLFRKSNLKPFERDI STEIYQAGSKPC  
NGVEGFNCYFPLQSYGFQPTNGVGYQPYRVVLSFELLHAPATVCGPKKSTNLVKNKCVN  
FNFNGLTGTGVLTESNKKFLPFQQFGRDIADTTDAVRDPQTEILDITPCSFGGVSVITP  
GTNTSNQVAVLYQGVNCTEVPVAIHADQLTPTWRVYSTGNSVFQTRAGCLIGAEHVNSY  
ECDIPIGAGICASYQTQTNRRRARSVASQSI IAYTMSLGAENSVAYSNNNSIAIPTNFTI

SVTTEILPVSMTKTSVDCTMYICGDSTECNSLLLQYGSFCTQLNRALTGIAVEQDKNTQE  
VFAQVKQIYKTPPIKDFGGFNFSQILPDPSKPSKRSFIEDLLFNKVTLADAGFIKQYGDC  
LGDIAARDLICAQKFNGLTVLPPLLTDEMIAQYTSALLAGTITSGWTFGAGAALQIPFAM  
QMAYRFNGIGVTONVLYENQKLIANQFNSAIGKIQDSLSTASALGKLQDVVNQNAQALN  
TLVKQLSSNFGAISSVLNDILSRLDKVEAEVQIDRLITGRLQSLQTYVTQQLIRAAEIRA  
SANLAATKMSECVLQSKRVDFCGKGYHLSFPPQSAPHGVVFLHVTYVPAQEKNFTTAPA  
ICHGKAHFPREGVFVSNGTHWFVTQRNFYEPQIITDNTFVSGNCDVVI GIVNNTVYDP  
LQPELDSFKEELDKYFKNHTSPDVLGDISGINASVVNIQKEIDRLNEVAKNLNESLIDL  
QELGKYEQYIKWPWYIWLGFIAGLIAIVMVTIMLCCMTSCCSCLKGCCSCGSCCKFDEDD  
SEPVKGVKHLHYT

>lcl|MZ533337.1\_prot\_QXL06446.1\_3 [gene=S] [protein=surface glycoprotein]  
[protein\_id=QXL06446.1] [location=21533..25348] [gbkey=CDS]  
MFVFLVLLPLVSSQCVNLRTRTQLPPAYTNSFTRGVYYPDKVFRSSVLHSTQDLFLPFFS  
NVTWFHAIHVSNGTNGTKRFDNPVLPFNDGVYFASTEKSNIIRGWIFGTTLDSTQSLIIV  
NNATNVVIKVECFQFCNDPFLGVYHKNKSWMESG--VYSSANNCTFEYVSQPFMLDLE  
GKQGNFNKLRREFVFNIDGYFKIYSKHTPINLVRDLPQGFSALEPLVDLPIGINITRFQT  
LLALHRSYLTPGDSSSGWTAGAAAYVGYLQPRTFLLKYNENGTITDAVDCALDPLSETK  
CTLKSFTVEKGIYQTSNFRVQPTESIVRFPNITNLCPFGEVFNATRFASVYAWNRRKRISN  
CVADYSVLVNSASFSTFKCYGVSPTKLNLDLCFTNVYADSFVIRGDEVQRQIAPGQTGKIAD  
YNYKLPDDFTGCVIAWNSNNLDSKVGNYNYRYRLFRKSNLKPFERDISTEIQAGSKPC  
NGVEGFNCYFPLQSYGFQPTNGVGYQPYRVVLSFELLHAPATVCGPKKSTNLVKNKCVN  
FNFNGLTGTGVLTESNKKFLPFQFGRDIADTTDAVRDPQTLEILDITPCSFGGVSVITP  
GTNTSNQVAVLYQGVNCTEVPVAIHADQLTPTWRVYSTGNSVVFQTRAGCLIGAEHVNSY  
ECDIPIGAGICASYQTQTNRRRARSVASQSI IAYTMSLGAENSVAYSNNNSIAIPTNFTI  
SVTTEILPVSMTKTSVDCTMYICGDSTECNSLLLQYGSFCTQLNRALTGIAVEQDKNTQE  
VFAQVKQIYKTPPIKDFGGFNFSQILPDPSKPSKRSFIEDLLFNKVTLADAGFIKQYGDC  
LGDIAARDLICAQKFNGLTVLPPLLTDEMIAQYTSALLAGTITSGWTFGAGAALQIPFAM  
QMAYRFNGIGVTONVLYENQKLIANQFNSAIGKIQDSLSTASALGKLQDVVNQNAQALN  
TLVKQLSSNFGAISSVLNDILSRLDKVEAEVQIDRLITGRLQSLQTYVTQQLIRAAEIRA  
SANLAATKMSECVLQSKRVDFCGKGYHLSFPPQSAPHGVVFLHVTYVPAQEKNFTTAPA  
ICHGKAHFPREGVFVSNGTHWFVTQRNFYEPQIITDNTFVSGNCDVVI GIVNNTVYDP  
LQPELDSFKEELDKYFKNHTSPDVLGDISGINASVVNIQKEIDRLNEVAKNLNESLIDL  
QELGKYEQYIKWPWYIWLGFIAGLIAIVMVTIMLCCMTSCCSCLKGCCSCGSCCKFDEDD  
SEPVKGVKHLHYT

>lcl|MZ533367.1\_prot\_QXL06791.1\_3 [gene=S] [protein=surface glycoprotein]  
[protein\_id=QXL06791.1] [location=21533..25348] [gbkey=CDS]  
MFVFLVLLPLVSSQCVNLRTRTQLPPAYTNSFTRGVYYPDKVFRSSVLHSTQDLFLPFFS  
NVTWFHAIHVSNGTNGTKRFDNPVLPFNDGVYFASTEKSNIIRGWIFGTTLDSTQSLIIV  
NNATNVVIKVECFQFCNDPFLGVYHKNKSWMESG--VYSSANNCTFEYVSQPFMLDLE  
GKQGNFNKLRREFVFNIDGYFKIYSKHTPINLVRDLPQGFSALEPLVDLPIGINITRFQT  
LLALHRSYLTPGDSSSGWTAGAAAYVGYLQPRTFLLKYNENGTITDAVDCALDPLSETK  
CTLKSFTVEKGIYQTSNFRVQPTESIVRFPNITNLCPFGEVFNATRFASVYAWNRRKRISN  
CVADYSVLVNSASFSTFKCYGVSPTKLNLDLCFTNVYADSFVIRGDEVQRQIAPGQTGKIAD  
YNYKLPDDFTGCVIAWNSNNLDSKVGNYNYRYRLFRKSNLKPFERDISTEIQAGSKPC  
NGVEGFNCYFPLQSYGFQPTNGVGYQPYRVVLSFELLHAPATVCGPKKSTNLVKNKCVN  
FNFNGLTGTGVLTESNKKFLPFQFGRDIADTTDAVRDPQTLEILDITPCSFGGVSVITP  
GTNTSNQVAVLYQGVNCTEVPVAIHADQLTPTWRVYSTGNSVVFQTRAGCLIGAEHVNSY  
ECDIPIGAGICASYQTQTNRRRARSVASQSI IAYTMSLGAENSVAYSNNNSIAIPTNFTI  
SVTTEILPVSMTKTSVDCTMYICGDSTECNSLLLQYGSFCTQLNRALTGIAVEQDKNTQE  
VFAQVKQIYKTPPIKDFGGFNFSQILPDPSKPSKRSFIEDLLFNKVTLADAGFIKQYGDC  
LGDIAARDLICAQKFNGLTVLPPLLTDEMIAQYTSALLAGTITSGWTFGAGAALQIPFAM  
QMAYRFNGIGVTONVLYENQKLIANQFNSAIGKIQDSLSTASALGKLQDVVNQNAQALN  
TLVKQLSSNFGAISSVLNDILSRLDKVEAEVQIDRLITGRLQSLQTYVTQQLIRAAEIRA  
SANLAATKMSECVLQSKRVDFCGKGYHLSFPPQSAPHGVVFLHVTYVPAQEKNFTTAPA  
ICHGKAHFPREGVFVSNGTHWFVTQRNFYEPQIITDNTFVSGNCDVVI GIVNNTVYDP  
LQPELDSFKEELDKYFKNHTSPDVLGDISGINASVVNIQKEIDRLNEVAKNLNESLIDL  
QELGKYEQYIKWPWYIWLGFIAGLIAIVMVTIMLCCMTSCCSCLKGCCSCGSCCKFDEDD  
SEPVKGVKHLHYT



>lcl|MZ533395.1\_prot\_QXL07109.1\_3 [gene=S] [protein=surface glycoprotein]  
[protein\_id=QXL07109.1] [location=21533..25348] [gbkey=CDS]  
MFVFLVLLPLVSSQCVNLRTRTQLPPAYTNSFTRGVYYPDKVFRSSVLHSTQDLFLPFFS  
NVTWFHAIHVSNGTNGTKRFDNPVLPFNDGVYFASTEKSNIIRGWIFGTTLDSKTQSLIV  
NNATNVVIKVEFQFCNDPFLGVYHKNKSWMESG--VYSSANNCTFEYVSQPFLMDLE  
GKQGNFKNLRFEVFKNIDGYFKIYSKHTPINLVRDLPQGFSALEPLVDLPIGINITRFQT  
LLALHRSYLTPGDSSSGWTAGAAAYVGYLQPRTFLLKYNENGTITDAVDCALDPLSETK  
CTLKSFTVEKGIYQTSNFRVQPTESIVRFPNITNLCPFGEVFNATRFASVYAWNRRKRISN  
CVADYSVLVNSASFSTFKCYGVSPTKLNLDLCFTNVYADSFVIRGDEVRQIAPGQTGKIAD  
YNYKLPDDFTGCVIAWNSNNLDSKVGNGYNYRYRLFRKSNLKPFERDISTEIQAGSKPC  
NGVEGFNCYFPLQSYGFQPTNGVGYQPYRVVLSFELLHAPATVCGPKKSTNLVKNKCVN  
FNFENGLTGTGVLTESNKKFLPFQQFGRDIADTTDAVRDPQTLEILDITPCSFGGVSVITP  
GTNTSNQVAVLYQGVNCTEVPVAIHADQLTPTWRVYSTGNSNVFQTRAGCLIGAEHVNSY  
ECDIPIGAGICASYQTQTNRRRARSVASQSI IAYTMSLGAENSVAYSNNIAIPTNFTI  
SVTTEILPVSMTKTSVDCTMYICGDSTECNLLLQYGSFCTQLNRALTGIAVEQDKNTQE  
VFAQVKQIYKTPPIKDFGGFNFSQILPDPSKPSKRSFIEDLLFNKVTLADAGFIKQYGDC  
LGDIAARDLICAQKFNGLTVLPPLLTDEMIAQYTSALLAGTITSGWTFGAGAALQIPFAM  
QMAYRFNGIGVTQNVLYENQKLIANQFNSAIGKIQDSLSTASALGKLQDVVNQNAQALN  
TLVKQLSSNFGAISSVLNDILSRLDKVEAEVQIDRLITGRLQSLQTYVTQQILIRAAEIRA  
SANLAATKMSECVLQSKRVDFCGKGYHLSFPPQSAPHGVVFLHVTYVPAQEKNFTTAPA  
ICHGKAHFPREGVFSNGTHWFVTQRNFYEPQIITDNTFVSGNCDVVI GIVNNTVYDP  
LQPELDSFKEELDKYFKNHTSPDVLGDISGINASVVNIQKEIDRLNEVAKNLNESLIDL  
QELGKYEQYIKWPWYIWLGFIAGLIAIVMVTIMLCCMTSCCCLKGCCSCGSCCKFDEDD  
SEPVKGVKLYHT

>lcl|MZ533480.1\_prot\_QXL08078.1\_3 [gene=S] [protein=surface glycoprotein]  
[protein\_id=QXL08078.1] [location=21533..25348] [gbkey=CDS]  
MFVFLVLLPLVSSQCVNLRTRTQLPPAYTNSFTRGVYYPDKVFRSSVLHSTQDLFLPFFS  
NVTWFHAIHVSNGTNGTKRFDNPVLPFNDGVYFASTEKSNIIRGWIFGTTLDSKTQSLIV  
NNATNVVIKVEFQFCNDPFLGVYHKNKSWMESG--VYSSANNCTFEYVSQPFLMDLE  
GKQGNFKNLRFEVFKNIDGYFKIYSKHTPINLVRDLPQGFSALEPLVDLPIGINITRFQT  
LLALHRSYLTPGDSSSGWTAGAAAYVGYLQPRTFLLKYNENGTITDAVDCALDPLSETK  
CTLKSFTVEKGIYQTSNFRVQPTESIVRFPNITNLCPFGEVFNATRFASVYAWNRRKRISN  
CVADYSVLVNSASFSTFKCYGVSPTKLNLDLCFTNVYADSFVIRGDEVRQIAPGQTGKIAD  
YNYKLPDDFTGCVIAWNSNNLDSKVGNGYNYRYRLFRKSNLKPFERDISTEIQAGSKPC  
NGVEGFNCYFPLQSYGFQPTNGVGYQPYRVVLSFELLHAPATVCGPKKSTNLVKNKCVN  
FNFENGLTGTGVLTESNKKFLPFQQFGRDIADTTDAVRDPQTLEILDITPCSFGGVSVITP  
GTNTSNQVAVLYQGVNCTEVPVAIHADQLTPTWRVYSTGNSNVFQTRAGCLIGAEHVNSY  
ECDIPIGAGICASYQTQTNRRRARSVASQSI IAYTMSLGAENSVAYSNNIAIPTNFTI  
SVTTEILPVSMTKTSVDCTMYICGDSTECNLLLQYGSFCTQLNRALTGIAVEQDKNTQE  
VFAQVKQIYKTPPIKDFGGFNFSQILPDPSKPSKRSFIEDLLFNKVTLADAGFIKQYGDC  
LGDIAARDLICAQKFNGLTVLPPLLTDEMIAQYTSALLAGTITSGWTFGAGAALQIPFAM  
QMAYRFNGIGVTQNVLYENQKLIANQFNSAIGKIQDSLSTASALGKLQDVVNQNAQALN  
TLVKQLSSNFGAISSVLNDILSRLDKVEAEVQIDRLITGRLQSLQTYVTQQILIRAAEIRA  
SANLAATKMSECVLQSKRVDFCGKGYHLSFPPQSAPHGVVFLHVTYVPAQEKNFTTAPA  
ICHGKAHFPREGVFSNGTHWFVTQRNFYEPQIITDNTFVSGNCDVVI GIVNNTVYDP  
LQPELDSFKEELDKYFKNHTSPDVLGDISGINASVVNIQKEIDRLNEVAKNLNESLIDL  
QELGKYEQYIKWPWYIWLGFIAGLIAIVMVTIMLCCMTSCCCLKGCCSCGSCCKFDEDD  
SEPVKGVKLYHT

>lcl|MZ533497.1\_prot\_QXL08273.1\_3 [gene=S] [protein=surface glycoprotein]  
[protein\_id=QXL08273.1] [location=21533..25348] [gbkey=CDS]  
MFVFLVLLPLVSSQCVNLRTRTQLPPAYTNSFTRGVYYPDKVFRSSVLHSTQDLFLPFFS  
NVTWFHAIHVSNGTNGTKRFDNPVLPFNDGVYFASTEKSNIIRGWIFGTTLDSKTQSLIV  
NNATNVVIKVEFQFCNDPFLGVYHKNKSWMESG--VYSSANNCTFEYVSQPFLMDLE  
GKQGNFKNLRFEVFKNIDGYFKIYSKHTPINLVRDLPQGFSALEPLVDLPIGINITRFQT  
LLALHRSYLTPGDSSSGWTAGAAAYVGYLQPRTFLLKYNENGTITDAVDCALDPLSETK  
CTLKSFTVEKGIYQTSNFRVQPTESIVRFPNITNLCPFGEVFNATRFASVYAWNRRKRISN  
CVADYSVLVNSASFSTFKCYGVSPTKLNLDLCFTNVYADSFVIRGDEVRQIAPGQTGKIAD  
YNYKLPDDFTGCVIAWNSNNLDSKVGNGYNYRYRLFRKSNLKPFERDISTEIQAGSKPC

NGVEGFNCYFPLQSYGFQPTNGVGYQPYRVVLSFELLHAPATVCGPKKSTNLVKNKCVN  
FNFNGLTGTGVLTESNKKFLPFQQFGRDIADTTDAVRDPQTEILDITPCSFGGVSVITP  
GTNTSNQVAVLYQGVNCTEVPVAIHADQLTPTWRVYSTGSNVFQTRAGCLIGAHEVNNSY  
ECDIPIGAGICASYQTQTNRRRARSVASQSI IAYTMSLGAENSVAYSNNSIAIPTNFTI  
SVTTEILPVSMTKTSVDCTMYICGDSTECNLLLQYGSFCTQLNRALTGIAVEQDKNTQE  
VFAQVKQIYKTPPIKDFGGFNFSQILPDPSKPSKRSFIEDLLFNKVTLADAGFIKQYGDC  
LGDIAARDLICAQKFNGLTVLPPLLTDEMIAQYTSALLAGTITSGWTFGAGAALQIPFAM  
QMAYRFNGIGVTQNVLYENQKLIANQFNSAIGKIQDSLSTASALGKLQDVVNQNAQALN  
TLVKQLSSNFGAISSVLDILSRLDKVEAEVQIDRLITGRLQSLQTYVTQQLIRAAEIRA  
SANLAATKMSECVLQSKRVDFCGKGYHLMSFPQSAPHGVVFLHVTVYVPAQEKNFTTAPA  
ICHDGKAHFPREGVFSVNGTHWFVTQRNFYEPQIITDNTFVSGNCDVVIGIVNNTVYDP  
LQPELDSFKEELDKYFKNHTSPDVLGDISGINASVVNIQKEIDRLNEVAKNLNESLIDL  
QELGKYEQYIKWPWYIWLGFIAGLIAIVMVTIMLCCMTSCCCLKGCCSCGSCCKFDEDD  
SEPVKGVKLYHT

>lcl|MZ566407.1\_prot\_QX032256.1\_3 [gene=S] [protein=surface glycoprotein]  
[protein\_id=QX032256.1] [location=21533..25348] [gbkey=CDS]  
MFVFLVLLPLVSSQCVNLRTRTQLPPAYTNSFTRGVYYPDKVFRSSVLHSTQDLFLPFFS  
NVTWFHAIHVSNGTNGTKRFDNPVLPFNDGVYFASTEKSNIRGWIFGTTLDLSDKTSQSLIV  
NNATNVVIKVECFQFCNDPFLGVYHKNKSWMESG--VYSSANNCTFEYVSQPFMDLE  
GKQGNFKNLREFVFKNIDGYFKIYSKHTPINLVRDLPPQGFSALEPLVDLPIGINITRFQT  
LLALHRSYLTGDDSSSGWTAGAAAYVGYLQPRTFLLKYNENGTITDAVDCALDPLSETK  
CTLKSFTVEKGIYQTSNFRVQPTESIVRFPNITNLCPFGEVFNATRFASVYAWNRRKRISN  
CVADYSVLVNSASFSTFKCYGVSPTKLNLDLCTNVYADSFVIRGDEVQRQIAPGQTGKIAD  
YNYKLPDDFTGCVIAWNSNLDLSDKVVGGNYRYRFRKSNLKPFERDITSTEIYQAGSKPC  
NGVEGFNCYFPLQSYGFQPTNGVGYQPYRVVLSFELLHAPATVCGPKKSTNLVKNKCVN  
FNFNGLTGTGVLTESNKKFLPFQQFGRDIADTTDAVRDPQTEILDITPCSFGGVSVITP  
GTNTSNQVAVLYQGVNCTEVPVAIHADQLTPTWRVYSTGSNVFQTRAGCLIGAHEVNNSY  
ECDIPIGAGICASYQTQTNRRRARSVASQSI IAYTMSLGAENSVAYSNNSIAIPTNFTI  
SVTTEILPVSMTKTSVDCTMYICGDSTECNLLLQYGSFCTQLNRALTGIAVEQDKNTQE  
VFAQVKQIYKTPPIKDFGGFNFSQILPDPSKPSKRSFIEDLLFNKVTLADAGFIKQYGDC  
LGDIAARDLICAQKFNGLTVLPPLLTDEMIAQYTSALLAGTITSGWTFGAGAALQIPFAM  
QMAYRFNGIGVTQNVLYENQKLIANQFNSAIGKIQDSLSTASALGKLQDVVNQNAQALN  
TLVKQLSSNFGAISSVLDILSRLDKVEAEVQIDRLITGRLQSLQTYVTQQLIRAAEIRA  
SANLAATKMSECVLQSKRVDFCGKGYHLMSFPQSAPHGVVFLHVTVYVPAQEKNFTTAPA  
ICHDGKAHFPREGVFSVNGTHWFVTQRNFYEPQIITDNTFVSGNCDVVIGIVNNTVYDP  
LQPELDSFKEELDKYFKNHTSPDVLGDISGINASVVNIQKEIDRLNEVAKNLNESLIDL  
QELGKYEQYIKWPWYIWLGFIAGLIAIVMVTIMLCCMTSCCCLKGCCSCGSCCKFDEDD  
SEPVKGVKLYHT

>lcl|MZ396559.1\_prot\_QWS81979.1\_3 [gene=S] [protein=surface glycoprotein]  
[protein\_id=QWS81979.1] [location=21534..25349] [gbkey=CDS]  
MFVFLVLLPLVSSQCVNLRTRTQLPPAYTNSFTRGVYYPDKVFRSSVLHSTQDLFLPFFS  
NVTWFHAIHVSNGTNGTKRFANPVLFPNDGVYFASTEKSNIRGWIFGTTLDLSDKTSQSLIV  
NNATNVVIKVECFQFCNDPFLGVYHKNKSWMESG--VYSSANNCTFEYVSQPFMDLE  
GKQGNFKNLREFVFKNIDGYFKIYSKHTPINLVRDLPPQGFVLEPLVDLPIGINITRFQT  
LLALHRSYLTGDDSSSGWTAGAAAYVGYLQPRTFLLKYNENGTITDAVDCALDPLSETK  
CTLKSFTVEKGIYQTSNFRVQPTESIVRFPNITNLCPFGEVFNATRFASVYAWNRRKRISN  
CVADYSVLVNSASFSTFKCYGVSPTKLNLDLCTNVYADSFVIRGDEVQRQIAPGQTGKIAD  
YNYKLPDDFTGCVIAWNSNLDLSDKVVGGNYRYRFRKSNLKPFERDITSTEIYQAGSKPC  
NGVEGFNCYFPLQSYGFQPTNGVGYQPYRVVLSFELLHAPATVCGPKKSTNLVKNKCVN  
FNFNGLTGTGVLTESNKKFLPFQQFGRDIADTTDAVRDPQTEILDITPCSFGGVSVITP  
GTNTSNQVAVLYQGVNCTEVPVAIHADQLTPTWRVYSTGSNVFQTRAGCLIGAHEVNNSY  
ECDIPIGAGICASYQTQTNRRRARSVASQSI IAYTMSLGAENSVAYSNNSIAIPTNFTI  
SVTTEILPVSMTKTSVDCTMYICGDSTECNLLLQYGSFCTQLNRALTGIAVEQDKNTQE  
VFAQVKQIYKTPPIKDFGGFNFSQILPDPSKPSKRSFIEDLLFNKVTLADAGFIKQYGDC  
LGDIAARDLICAQKFNGLTVLPPLLTDEMIAQYTSALLAGTITSGWTFGAGAALQIPFAM  
QMAYRFNGIGVTQNVLYENQKLIANQFNSAIGKIQDSLSTASALGKLQDVVNQNAQALN  
TLVKQLSSNFGAISSVLDILSRLDKVEAEVQIDRLITGRLQSLQTYVTQQLIRAAEIRA  
SANLAATKMSECVLQSKRVDFCGKGYHLMSFPQSAPHGVVFLHVTVYVPAQEKNFTTAPA

ICHGKAHFPREGV FVSN GTHWFVTQRNFYEPQIIITDNTFVSGNCDVVI GIVNNTVYDP  
LQPELDSFKEELDKYFKNHTSPDVDLGDISGINASVVNIQKEIDRLNEVAKNLNESLIDL  
QELGKYEQYIKWPWYIWLGFIAGLIAIVMVTIMLCCMTSCC SCLKGCCSCGSCCKFDEDD  
SEPLLKGVK LHYT

>lcl|MZ186672.1\_prot\_QVG34500.1\_3 [gene=S] [protein=surface glycoprotein]  
[protein\_id=QVG34500.1] [location=21562..25377] [gbkey=CDS]  
MFVFLVLLPLVSSQCVNLRTRTQLPPAYTNSFTRGVYYPDKVFRSSVLHSTQDLFLPFFS  
NVTWFHAIHVS GTNGTKRFDNPVLPFNDGVYFASTEKSNIIRGWIFGTTLDSKTQSLLIV  
NNATNVVIK VCFEQFCNDPFLGVYYHKNNKSWMESG--VYSSANNCTFEYVSQPF LMDLE  
GKQGNFKNLREFVFKNIDGYFKIYSKHTPINLVRDLPQGF SVLEPLVDLPIGINITRFQT  
LLALHRSYLTPGDSSSGWTAGAAAYVGYLQPRTFLLKYNENGTITDAVDCALDPLSETK  
CTLKSFTVEKGIYQTSNFRVQPTESIVRFPNITNLCPFGEVFNATRFASVYAWNRRKRISN  
CVADYSVL YNSASFSTFKCYGVSPTKLNLDLCFTNVYADSFVIRGDEVRQIAPGQTGKIAD  
YNYKLPDDFTGCVIAWNSNNLDSKVG GNYRYR LFRKSNLKP FERDISTEIQAGSKPC  
NGVEGFNCYFPLQSYGFQPTNGVGYQPYRVVLSFELLHAPATVCGPKKSTNLVKNKCVN  
FNFENGLTGTGVLTESNKKFLPFQ QFGRDIADTTDAVRDPQTLEILDITPCSFGGVS VITP  
GTNTSNQVAVLYQGVNCTEVPVAIHADQLTPTWRVYSTG SNVFQTRAGCLIGAEHVNNSY  
ECDIPIGAGICASYQTQ TNSRRRARSVASQSI IAYTMSLGAENSVAYSNN SIAIPTNFTI  
SVTTEILPVSMTKTSVDCTMYICGDSTEC SNLLLQYGSFCTQLNRALTGIAVEQDKNTQE  
VFAQVKQIYKTPPIKDFGGFNFSQILPDPSKPSKRSFIEDLLFNKVT LADAGFIKQYGDC  
LGDIAARDLICAQKFNGLTVLPPLLTDEMIAQYTSALLAGTITSGWTFGAGAALQIPFAM  
QMAYRFNGIGVTQNVLYENQKLIANQFN SAIGKIQDSL SASTASALGKLQDVVNQNAQALN  
TLVKQLSSNFGAISSVLNDILSR LDKVEAEVQIDRLITGRLQSLQTYVTQQLIRAAEIRA  
SANLAATKMSECVLGQSKRVDFCGKGYH LMSFPQSAPHGVVFLHVTYVPAQEKNFTTAPA  
ICHGKAHFPREGV FVSN GTHWFVTQRNFYEPQIIITDNTFVSGNCDVVI GIVNNTVYDP  
LQPELDSFKEELDKYFKNHTSPDVDLGDISGINASVVNIQKEIDRLNEVAKNLNESLIDL  
QELGKYEQYIKWPWYIWLGFIAGLIAIVMVTIMLCCMTSCC SCLKGCCSCGSCCKFDEDD  
SEPLLKGVK LHYT

>lcl|MZ414234.1\_prot\_QWU49243.1\_3 [gene=S] [protein=surface glycoprotein]  
[protein\_id=QWU49243.1] [location=21533..25348] [gbkey=CDS]  
MFVFLVLLPLVSSQCVNLRTRTQLPPAYTNSFTRGVYYPDKVFRSSVLHSTQDLFLPFFS  
NVTWFHAIHVS GTNGTKRFDNPVLPFNDGVYFASTEKSNIIRGWIFGTTLDSKTQSLLIV  
NNATNVVIK VCFEQFCNDPFLGVYYHKNNKSWMESG--VYSSANNCTFEYVSQPF LMDLE  
GKQGNFKNLREFVFKNIDGYFKIYSKHTPINLVRDLPQGF SVLEPLVDLPIGINITRFQT  
LLALHRSYLTPGDSSSGWTAGAAAYVGYLQPRTFLLKYNENGTITDAVDCALDPLSETK  
CTLKSFTVEKGIYQTSNFRVQPTESIVRFPNITNLCPFGEVFNATRFASVYAWNRRKRISN  
CVADYSVL YNSASFSTFKCYGVSPTKLNLDLCFTNVYADSFVIRGDEVRQIAPGQTGKIAD  
YNYKLPDDFTGCVIAWNSNNLDSKVG GNYRYR LFRKSNLKP FERDISTEIQAGSKPC  
NGVEGFNCYFPLQSYGFQPTNGVGYQPYRVVLSFELLHAPATVCGPKKSTNLVKNKCVN  
FNFENGLTGTGVLTESNKKFLPFQ QFGRDIADTTDAVRDPQTLEILDITPCSFGGVS VITP  
GTNTSNQVAVLYQGVNCTEVPVAIHADQLTPTWRVYSTG SNVFQTRAGCLIGAEHVNNSY  
ECDIPIGAGICASYQTQ TNSRRRARSVASQSI IAYTMSLGAENSVAYSNN SIAIPTNFTI  
SVTTEILPVSMTKTSVDCTMYICGDSTEC SNLLLQYGSFCTQLNRALTGIAVEQDKNTQE  
VFAQVKQIYKTPPIKDFGGFNFSQILPDPSKPSKRSFIEDLLFNKVT LADAGFIKQYGDC  
LGDIAARDLICAQKFNGLTVLPPLLTDEMIAQYTSALLAGTITSGWTFGAGAALQIPFAM  
QMAYRFNGIGVTQNVLYENQKLIANQFN SAIGKIQDSL SASTASALGKLQDVVNQNAQALN  
TLVKQLSSNFGAISSVLNDILSR LDKVEAEVQIDRLITGRLQSLQTYVTQQLIRAAEIRA  
SANLAATKMSECVLGQSKRVDFCGKGYH LMSFPQSAPHGVVFLHVTYVPAQEKNFTTAPA  
ICHGKAHFPREGV FVSN GTHWFVTQRNFYEPQIIITDNTFVSGNCDVVI GIVNNTVYDP  
LQPELDSFKEELDKYFKNHTSPDVDLGDISGINASVVNIQKEIDRLNEVAKNLNESLIDL  
QELGKYEQYIKWPWYIWLGFIAGLIAIVMVTIMLCCMTSCC SCLKGCCSCGSCCKFDEDD  
SEPLLKGVK LHYT

>lcl|MZ533237.1\_prot\_QXL05304.1\_3 [gene=S] [protein=surface glycoprotein]  
[protein\_id=QXL05304.1] [location=21533..25348] [gbkey=CDS]  
MFVFLVLLPLVSSQCVNLRTRTQLPPAYTNSFTRGVYYPDKVFRSSVLHSTQDLFLPFFS  
NVTWFHAIHVS GTNGTKRFDNPVLPFNDGVYFASTEKSNIIRGWIFGTTLDSKTQSLLIV  
NNATNVVIK VCFEQFCNDPFLGVYYHKNNKSWMESG--VYSSANNCTFEYVSQPF LMDLE  
GKQGNFKNLREFVFKNIDGYFKIYSKHTPINLVRDLPQGF SVLEPLVDLPIGINITRFQT

LLALHRSYLTPGDSSSGWTAGAAAYVGYLQPRTFLLKYNENGTITDAVDCALDPLSETK  
CTLKSFTVEKGIYQTSNFRVQPTESIVRFPNITNLCPFGEVFNATRFASVYAWNRRKRISN  
CVADYSVLVNSASFSTFKCYGVSPTKLNLDLCFTNVYADSFVIRGDEVRQIAPGQTGKIAD  
YNYKLPDDFTGCVIAWNSNNLDSKVGGNYNRYRRLFRKSNLKPFERDI STEIYQAGSKPC  
NGVEGFNCYFPLQSYGFQPTNGVGYQPYRVVLSFELLHAPATVCGPKKSTNLVKNKCVN  
FNFNGLTGTGVLTESNKKFLPFQQFGRDIADTTDAVRDPQTEILDITPCSFGGVSVITP  
GTNTSNQVAVLYQGVNCTEVPVAIHADQLTPTWRVYSTGSNVFQTRAGCLIGAEHVNSY  
ECDIPIGAGICASYQTQTNRRRARSVASQSI IAYTMSLGAENSVAYSNNSIAIPTNFTI  
SVTTEILPVSMTKTSVDCTMYICGDSTECNLLLQYGSFCTQLNRALTGIAVEQDKNTQE  
VFAQVKQIYKTPPIKDFGGFNFSQILPDPSKPSKRSFIEDLLFNKVTLADAGFIKQYGDC  
LGDIAARDLICAQKFNGLTVLPPLLTDEMIAQYTSALLAGTITSGWTFGAGAALQIPFAM  
QMAYRFNGIGVTQNVLYENQKLIANQFNSAIGKIQDSLSTASALGKLQDVVNQNAQALN  
TLVKQLSSNFGAISSVLNDILSRLDKVEAEVQIDRLITGRLQSLQTYVTQQILIRAAEIRA  
SANLAATKMSECVLQSKRVDFCGKGYHLSFPPQSAPHGVVFLHVTYVPAQEKNFTTAPA  
ICHDGKAHFPREGVFSNGTHWFVTQRNFYEPQIITDNTFVSGNCDVVI GIVNNTVYDP  
LQPELDSFKEELDKYFKNHTSPDVLGDISGINASVVNIQKEIDRLNEVAKNLNESLIDL  
QELGKYEQYIKWPWYIWLGFIAGLIAIVMVTIMLCCMTSCCCLKGCCSCGSCCKFDEDD  
SEPLLKGVKLYHT

>lcl|MZ367637.1\_prot\_QW014822.1\_3 [gene=S] [protein=surface glycoprotein]  
[protein\_id=QW014822.1] [location=21525..25340] [gbkey=CDS]  
MFVFLVLLPLVSSQCVNLRTRTQLPPAYTNSFTRGVYYPDKVFRSSVLHSTQDLFLPFFS  
NVTWFHAIHVSGTNGTKRFDNPVLPFNDGVYFASTEKSNIIRGWIFGTTLDSKTQSLIV  
NNATNVVIKVCFFQFCNDPFLDVYYHKNNKSWMESG--VYSSANNCTFEYVSQPFLLMDLE  
GKQGNFKNLREFVFKNIDGYFKIYSKHTPINLVRDLDPQGFVLEPLVDLPIGINITRFQT  
LLALHRSYLTPGDSSSGWTAGAAAYVGYLQPRTFLLKYNENGTITDAVDCALDPLSETK  
CTLKSFTVEKGIYQTSNFRVQPTESIVRFPNITNLCPFGEVFNATRFASVYAWNRRKRISN  
CVADYSVLVNSASFSTFKCYGVSPTKLNLDLCFTNVYADSFVIRGDEVRQIAPGQTGKIAD  
YNYKLPDDFTGCVIAWNSNNLDSKVGGNYNRYRRLFRKSNLKPFERDI STEIYQAGSKPC  
NGVEGFNCYFPLQSYGFQPTNGVGYQPYRVVLSFELLHAPATVCGPKKSTNLVKNKCVN  
FNFNGLTGTGVLTESNKKFLPFQQFGRDIADTTDAVRDPQTEILDITPCSFGGVSVITP  
GTNTSNQVAVLYQGVNCTEVPVAIHADQLTPTWRVYSTGSNVFQTRAGCLIGAEHVNSY  
ECDIPIGAGICASYQTQTNRRRARSVASQSI IAYTMSLGAENSVAYSNNSIAIPTNFTI  
SVTTEILPVSMTKTSVDCTMYICGDSTECNLLLQYGSFCTQLNRALTGIAVEQDKNTQE  
VFAQVKQIYKTPPIKDFGGFNFSQILPDPSKPSKRSFIEDLLFNKVTLADAGFIKQYGDC  
LGDIAARDLICAQKFNGLTVLPPLLTDEMIAQYTSALLAGTITSGWTFGAGAALQIPFAM  
QMAYRFNGIGVTQNVLYENQKLIANQFNSAIGKIQDSLSTASALGKLQDVVNQNAQALN  
TLVKQLSSNFGAISSVLNDILSRLDKVEAEVQIDRLITGRLQSLQTYVTQQILIRAAEIRA  
SANLAATKMSECVLQSKRVDFCGKGYHLSFPPQSAPHGVVFLHVTYVPAQEKNFTTAPA  
ICHDGKAHFPREGVFSNGTHWFVTQRNFYEPQIITDNTFVSGNCDVVI GIVNNTVYDP  
LQPELDSFKEELDKYFKNHTSPDVLGDISGINASVVNIQKEIDRLNEVAKNLNESLIDL  
QELGKYEQYIKWPWYIWLGFIAGLIAIVMVTIMLCCMTSCCCLKGCCSCGSCCKFDEDD  
SEPVKGVKLYHT

>lcl|MZ179325.1\_prot\_QVF50764.1\_3 [gene=S] [protein=surface glycoprotein]  
[protein\_id=QVF50764.1] [location=21509..25324] [gbkey=CDS]  
MFVFFVLLPLVSSQCVNLRTRTQLPPAYTNSFTRGVYYPDKVFRSSVLHSTQDLFLPFFS  
NVTWFHAIHVSGTNGTKRFDNPVLPFNDGVYFASTEKSNIIRGWIFGTTLDSKTQSLIV  
NNATNVVIKVCFFQFCNDPFLDVYYHKNNKSWMESG--VYSSANNCTFEYVSQPFLLMDLE  
GKQGNFKNLREFVFKNIDGYFKIYSKHTPINLVRDLDPQGFSALEPLVDLPIGINITRFQT  
LLALHRSYLTPGDSSSGWTAGAAAYVGYLQPRTFLLKYNENGTITDAVDCALDPLSETK  
CTLKSFTVEKGIYQTSNFRVQPTESIVRFPNITNLCPFGEVFNATRFASVYAWNRRKRISN  
CVADYSVLVNSASFSTFKCYGVSPTKLNLDLCFTNVYADSFVIRGDEVRQIAPGQTGKIAD  
YNYKLPDDFTGCVIAWNSNNLDSKVGGNYNRYRRLFRKSNLKPFERDI STEIYQAGSKPC  
NGVEGFNCYFPLQSYGFQPTNGVGYQPYRVVLSFELLHAPATVCGPKKSTNLVKNKCVN  
FNFNGLTGTGVLTESNKKFLPFQQFGRDIADTTDAVRDPQTEILDITPCSFGGVSVITP  
GTNTSNQVAVLYQGVNCTEVPVAIHADQLTPTWRVYSTGSNVFQTRAGCLIGAEHVNSY  
ECDIPIGAGICASYQTQTNRRRARSVASQSI IAYTMSLGAENSVAYSNNSIAIPTNFTI  
SVTTEILPVSMTKTSVDCTMYICGDSTECNLLLQYGSFCTQLNRALTGIAVEQDKNTQE  
VFAQVKQIYKTPPIKDFGGFNFSQILPDPSKPSKRSFIEDLLFNKVTLADAGFIKQYGDC

LGDIAARDLICAQKFNGLTVLPPLLTDEMIAQYTSALLAGTITSGWTFGAGAALQIPFAM  
QMA YRFNGIGV TQ NVLYENQKLIANQFN SAIGKIQDSL SSTA SALGKLQDVVNQNAQALN  
TLVKQLSSNFGA ISSV LNDILSR LDKVEAEVQIDRLITGRLQSLQTYVTQQLIRAAEIRA  
SANLAATKMSECVLGQSKRVDFCGKGYHLSFPPQSAPHGVVFLHVTVYVPAQEKNFTTAPA  
ICH DGKAHFPREGVFVSNGTHWFVTQRNFYEPQIITTDNTFVSGNCDVVI GIVNNTVYDP  
LQPELDSFKEELDKYFKNHTSPDVLGDISGINASVVNIQKEIDRLNEVAKNLNESLIDL  
QELGKYEQYIKWPWYIWLGFIAGLIAIVMVTIMLCCMTSCCSCLKGCCSCGSCCKFDEDD  
SEPV LKGVK LHYT

>lcl|MZ401449.1\_prot\_QWT51622.1\_3 [gene=S] [protein=surface glycoprotein]  
[protein\_id=QWT51622.1] [location=21513..25328] [gbkey=CDS]  
MFVFLVLLPLVSSQCVNLRTRTQLPSAYTNSFTRGVYYPDKVFRSSVLHSTQDLFLPFFS  
NVTWFHAIHVS GTNGTKRFDNPVLPFNDGVYFASTEKSNIIRGWIFGTTLDSKTQSL LIV  
NNATNVVIK VCE FQFCNDPFLDVYYHKNNKSWMESG--VYSSANNCTFEYVSQPF LMDLE  
GKQGNFKNLREFVFKNIDGYFKIYSKHTPINLVRDLPQGFSALEPLVDLPIGINITRFQT  
LLALHRSYLTPGDSSSGWTAGAAAYVGYLQPRTFLLKYNENGTITDAVDCALDPLSETK  
CTLKSFTVEKGIYQTSNFRVQPTESIVRFPNITNLCPFGEVFNATRFASVYAWNRRKRISN  
CVADYSVL YNSASFSTFKCYGVSPTKLNLDLCFTNVYADSFVIRGDEV RQIAPGQTGKIAD  
YNYKLPDDFTGCVIAWNSNNLDSKVG GNYNYRYRLFRKSNLKPFERDI STEIYQAGSKPC  
NGVEGFNCYFPLQSYGFQPTNGVGYQPYRVVLSFELLHAPATVCGPKKSTNLVKNKCVN  
FNFNGLTGTGVLTESNKKFLPFQQFGRDIADTTDAVRDPQTLEILDITPCSFGGVS VITP  
GTNTSNQVAVLYQGVNCTEVPVAIHADQLTPTWRVYSTG SNVFQTRAGCLIGA EHVNNSY  
ECDIPIGAGICASYQTQ TNSRRRARSVASQSI IAYTMSLGAENSVAYSNN SIAIPTNFTI  
SVTTEILPVSMTKTSVDCTMYICGDSTEC SNLLLQYGSFCTQLNRALTGIAVEQDKNTQE  
VFAQVKQIYKTPPIKDFGGFNFSQILPDPSKPSKRSFIEDLLFNKVTLADAGFIKQY GDC  
LGDIAARDLICAQKFNGLTVLPPLLTDEMIAQYTSALLAGTITSGWTFGAGAALQIPFAM  
QMA YRFNGIGV TQ NVLYENQKLIANQFN SAIGKIQDSL SSTA SALGKLQDVVNQNAQALN  
TLVKQLSSNFGA ISSV LNDILSR LDKVEAEVQIDRLITGRLQSLQTYVTQQLIRAAEIRA  
SANLAATKMSECVLGQSKRVDFCGKGYHLSFPPQSAPHGVVFLHVTVYVPAQEKNFTTAPA  
ICH DGKAHFPREGVFVSNGTHWFVTQRNFYEPQIITTDNTFVSGNCDVVI GIVNNTVYDP  
LQPELDSFKEELDKYFKNHTSPDVLGDISGINASVVNIQKEIDRLNEVAKNLNESLIDL  
QELGKYEQYIKWPWYIWLGFIAGLIAIVMVTIMLCCMTSCCSCLKGCCSCGSCCKFDEDD  
SEPV LKGVK LHYT

>lcl|MZ170136.1\_prot\_QVE56189.1\_3 [gene=S] [protein=surface glycoprotein]  
[protein\_id=QVE56189.1] [location=21559..25374] [gbkey=CDS]  
MFVFLVLLPLVSSQCVNLRTRTQLPPAYTNSFTRGVYYPDKVFRSSVLHSTQDLFLPFFS  
NVTWFHAIHVS GTNGTKRFDNPVLPFNDGVYFASTEKSNIIRGWIFGTTLDSKTQSL LIV  
NNATNVVIK VCE FQFCNDPFLDVYYHKNNKSWMESG--VYSSANNCTFEYVSQPF LMDLE  
GKQGNFKNLREFVFKNIDGYFKIYSKHTPINLVRDLPQGFSALEPLVDLPIGINITRFQT  
LLALHRSYLTPGDSSSGWTAGAAAYVGYLQPRTFLLKYNENGTITDAVDCALDPLSETK  
CTLKSFTVEKGIYQTSNFRVQPTESIVRFPNITNLCPFGEVFNATRFASVYAWNRRKRISN  
CVADYSVL YNSASFSTFKCYGVSPTKLNLDLCFTNVYADSFVIRGDEV RQIAPGQTGKIAD  
YNYKLPDDFTGCVIAWNSNNLDSKVG GNYNYRYRLFRKSNLKPFERDI STEIYQAGSKPC  
NGVEGFNCYFPLQSYGFQPTNGVGYQPYRVVLSFELLHAPATVCGPKKSTNLVKNKCVN  
FNFNGLTGTGVLTESNKKFLPFQQFGRDIADTTDAVRDPQTLEILDITPCSFGGVS VITP  
GTNTSNQVAVLYQGVNCTEVPVAIHADQLTPTWRVYSTG SNVFQTRAGCLIGA EHVNNSY  
ECDIPIGAGICASYQTQ TNSRRRARSVASQSI IAYTMSLGAENSVAYSNN SIAIPTNFTI  
SVTTEILPVSMTKTSVDCTMYICGDSTEC SNLLLQYGSFCTQLNRALTGIAVEQDKNTQE  
VFAQVKQIYKTPPIKDFGGFNFSQILPDPSKPSKRSFIEDLLFNKVTLADAGFIKQY GDC  
LGDIAARDLICAQKFNGLTVLPPLLTDEMIAQYTSALLAGTITSGWTFGAGAALQIPFAM  
QMA YRFNGIGV TQ NVLYENQKLIANQFN SAIGKIQDSL SSTA SALGKLQBVVNQNAQALN  
TLVKQLSSNFGA ISSV LNDILSR LDKVEAEVQIDRLITGRLQSLQTYVTQQLIRAAEIRA  
SANLAATKMSECVLGQSKRVDFCGKGYHLSFPPQSAPHGVVFLHVTVYVPAQEKNFTTAPA  
ICH DGKAHFPREGVFVSNGTHWFVTQRNFYEPQIITTDNTFVSGNCDVVI GIVNNTVYDP  
LQPELDSFKEELDKYFKNHTSPDVLGDISGINASVVNIQKEIDRLNEVAKNLNESLIDL  
QELGKYEQYIKWPWYIWLGFIAGLIAIVMVTIMLCCMTSCCSCLKGCCSCGSCCKFDEDD  
SEPV LKGVK LHYT

>lcl|MZ253480.1\_prot\_QVO30180.1\_3 [gene=S] [protein=surface glycoprotein]  
[protein\_id=QVO30180.1] [location=21509..25324] [gbkey=CDS]

MFVFLVLLPLVSSQCVNLRTRTQLPPAYTNSFTRGVYYPDKVFRSSVLHSTQDLFLPFFS  
NVTWFHAIHVSGTNGTKRFDNPVLPFNDGVYFASTEKSNIIRGWIFGTTLDSKTQSLLIV  
NNATNVVIKVEFQFCNDPFLDVYYHKNKSWMESG--VYSSANNCTFEYVSQPFLMDLE  
GKQGNFKNLREFVFKNIDGYFKIYSKHTPINLVRDLPOGFSALEPLVDLPIGINITRFQT  
LLALHRSYLT PGDSSSGWTAGAAAYVGYLQPRTFLLKYNENGTITDAVDCALDPLSETK  
CTLKSFTVEKGIYQTSNFRVQPTESIVRFPNITNLCPFGEVFNATRFASVYAWNRRKRISN  
CVADYSVLVNSASFSTFKCYGVSPTKLNLDLCFTNVYADSFVIRGDEVRQIAPGQTGKIAD  
YNYKLPDDFTGCVIAWNSNTLDSKVGGNYNRYRRLFRKSNLKPFERDISTERIYQAGSKPC  
NGVEGFNCYFPLQSYGFQPTNGVGYQPYRVVLSFELLHAPATVCGPKKSTNLVKNKCVN  
FNFNGLTGTGVLTESNKKFLPFQQFGRDIADTTDAVRDPQTEILDITPCSFGGVSVITP  
GTNTSNQVAVLYQGVNCTEVPVAIHADQLTPTWRVYSTGNSNVFQTRAGCLIGAEHVNSY  
ECDIPIGAGICASYQTQTNRRRARSVASQSI IAYTMSLGAENSVAYSNNNSIAIPTNFTI  
SVTTEILPVSMTKTSVDCTMYICGDSTECSNLLLQYGSFCTQLNRALTGIAVEQDKNTQE  
VFAQVKQIYKTPPIKDFGGFNFSQILPDPSKPSKRSFIEDLLFNKVTLADAGFIKQYGDC  
LGDIAARDLICAQKFNGLTVLPPLLTDEMIAQYTSALLAGTITSGWTFGAGAALQIPFAM  
QMAYRFNGIGVTQNVLYENQKLIANQFNSAIGKIQDSLSTASALGKLQDVVNQNAQALN  
TLVKQLSSNFGAISSVLNDILSRLDKVEAEVQIDRLITGRLQSLQTYVTQQILIRAAEIRA  
SANLAATKMSECVLQSKRVDFCGKGYHLSFPPQSAPHGVVFLHVTVVPAQEKNFTTAPA  
ICHGKAHFPREGVFSNGTHWFVTQRNFYEPQIITDNTFVSGNCDVVI GIVNNTVYDP  
LQPELDSFKEELDKYFKNHTSPDVLGDISGINASVVNIQKEIDRLNEVAKNLNESLIDL  
QELGKYEQYIKWPWYIWLGFIAGLIAIVMVTIMLCCMTSCCCLKGCCSCGSCCKFDEDD  
SEPVKGVKLYHT

>lcl|MZ340505.1\_prot\_QWE51964.1\_3 [gene=S] [protein=surface glycoprotein]  
[protein\_id=QWE51964.1] [location=21513..25328] [gbkey=CDS]

MFVFLVLLPLVSSQCVNLRTRTQLPPAYTNSFTRGVYYPDKVFRSSVLHSTQDLFLPFFS  
NVTWFHAIHVSGTNGTKRFDNPVLPFNDGVYFASTEKSNIIRGWIFGTTLDSKTQSLLIV  
NNATNVVIKVEFQFCNDPFLDVYYHKNKSWMESG--VYSSANNCTFEYVSQPFLMDLE  
GKQGNFKNLREFVFKNIDGYFKIYSKHTPINLVRDLPOGFSALEPLVDLPIGINITRFQT  
LLALHRSYLT PGDSSSGWTAGAAAYVGYLQPRTFLLKYNENGTITDAVDCALDPLSETK  
CTLKSFTVEKGIYQTSNFRVQPTESIVRFPNITNLCPFGEVFNATRFASVYAWNRRKRISN  
CVADYSVLVNSASFSTFKCYGVSPTKLNLDLCFTNVYADSFVIRGDEVRQIAPGQTGKIAD  
YNYKLPDDFTGCVIAWNSNLDLDSKVGGNYNRYRRLFRKSNLKPFERDISTERIYQAGSKPC  
NGVEGFNCYFPLQSYGFQPTNGVGYQPYRVVLSFELLHAPATVCGPKKSTNLVKNKCVN  
FNFNGLTGTGVLTESNKKFLPFQQFGRDIADTTDAVRDPQTEILDITPCSFGGVSVITP  
GTNTSNQVAVLYQGVNCTEVPVAIHADQLTPTWRVYSTGNSNVFQTRAGCLIGAEHVNSY  
ECDIPIGAGICASYQTQTNRRRARSVASQSI IAYTMSLGAENSVAYSNNNSIAIPTNFTI  
SVTTEILPVSMTKTSVDCTMYICGDSTECSNLLLQYGSFCTQLNRALTGIAVEQDKNTQE  
VFAQVKQIYKTPPIKDFGGFNFSQILPDPSKPSKRSFIEDLLFNKVTLADAGFIKQYGDC  
LGDIAARDLICAQKFNGLTVLPPLLTDEMIAQYTSALLAGTITSGWTFGAGAALQIPFAM  
QMAYRFNGIGVTQNVLYENQKLIANQFNSAIGKIQDSLSTASALGKLQDVVNQNAQALN  
TLVKQLSSNFGAISSVLNDILSRLDKVEAEVQIDRLITGRLQSLQTYVTQQILIRAAEIRA  
SANLAATKMSECVLQSKRVDFCGKGYHLSFPPQSAPHGVVFLHVTVVPAQEKNFTTAPA  
ICHGKAHFPREGVFSNGTHWFVTQRNFYEPQIITDNTFVSGNCDVVI GIVNNTVYDP  
LQPELDSFKEELDKYFKNHTSPDVLGDISGINASVVNIQKEIDRLNEVAKNLNESLIDL  
QELGKYEQYIKWPWYIWLGFIAGLIAIVMVTIMLCCMTSCCCLKGCCSCGSCCKFDEDD  
SEPVKGVKLYHT

>lcl|MZ340526.1\_prot\_QWE52161.1\_3 [gene=S] [protein=surface glycoprotein]  
[protein\_id=QWE52161.1] [location=21513..25328] [gbkey=CDS]

MFVFLVLLPLVSSQCVNLRTRTQLPPAYTNSFTRGVYYPDKVFRSSVLHSTQDLFLPFFS  
NVTWFHAIHVSGTNGTKRFDNPVLPFNDGVYFASTEKSNIIRGWIFGTTLDSKTQSLLIV  
NNATNVVIKVEFQFCNDPFLDVYYHKNKSWMESG--VYSSANNCTFEYVSQPFLMDLE  
GKQGNFKNLREFVFKNIDGYFKIYSKHTPINLVRDLPOGFSALEPLVDLPIGINITRFQT  
LLALHRSYLT PGDSSSGWTAGAAAYVGYLQPRTFLLKYNENGTITDAVDCALDPLSETK  
CTLKSFTVEKGIYQTSNFRVQPTESIVRFPNITNLCPFGEVFNATRFASVYAWNRRKRISN  
CVADYSVLVNSASFSTFKCYGVSPTKLNLDLCFTNVYADSFVIRGDEVRQIAPGQTGKIAD  
YNYKLPDDFTGCVIAWNSNLDLDSKVGGNYNRYRRLFRKSNLKPFERDISTERIYQAGSKPC  
NGVEGFNCYFPLQSYGFQPTNGVGYQPYRVVLSFELLHAPATVCGPKKSTNLVKNKCVN  
FNFNGLTGTGVLTESNKKFLPFQQFGRDIADTTDAVRDPQTEILDITPCSFGGVSVITP

GTNTSNQVAVLYQGVNCTEVPVAIHADQLTPTWRVYSTGNSVFQTRAGCLIGAEHVNNSY  
ECDIPIGAGICASYQTQTNRRRARSVASQSI IAYTMSLGAENSVAYSNNSIAIPTNFTI  
SVTTEILPVSMTKTSVDCTMYICGDSTECNSLLLQYGSFCTQLNRALTGIAVEQDKNTQE  
VFAQVKQIYKTPPIKDFGGFNFSQILPDPSKPSKRSFIEDLLFNKVTLADAGFIKQYGDC  
LGDIAARDLICAQKFNGLTVLPPLLTDEMIAQYTSALLAGTITSGWTFGAGAALQIPFAM  
QMAYRFNGIGVTONVLYENQKLIANQFNSAIGKIQDSLSTASALGKLQDVVNQNAQALN  
TLVKQLSSNFGAISSVLNDILSRLDKVEAEVQIDRLITGRLQSLQTYVTQQLIRAAEIRA  
SANLAATKMSECVLQSKRVDFCGKGYHLMSFPQSAPHGVVFLHVTVYVPAQEKNFTTAPA  
ICHDGKAHFPREGVFVSNGTHWFVTQRNFYEPQIITDNTFVSGNCDVVI GIVNNTVYDP  
LQPELDSFKEELDKYFKNHTSPDVLGDISGINASVVNIQKEIDRLNEVAKNLNESLIDL  
QELGKYEQYIKWPWYIWLGFIAGLIAIVMVTIMLCCMTSCCSCLKGCCSCGSCCKFDEDD  
SEPVKGVKHLHYT

>lcl|MZ531362.1\_prot\_QXK85668.1\_3 [gene=S] [protein=surface glycoprotein]  
[protein\_id=QXK85668.1] [location=21428..25243] [gbkey=CDS]  
MFVFLVLLPLVSSQCVNLRTRTQLPPAYTNSFTRGVYYPDKVFRSSVLHSTQDLFLPFFS  
NVTWFHAIHVSNGTNGTKRFDNPVLPFNDGVYFASTEKSNIIRGWIFGTTLDSTQSLIV  
NNATNVVIKVECFQFCNDPFLDVYYHKNKSWMESG--VYSSANNCTFEYVSQPFMDLE  
GKQGNFNKLNREFVFKNIDGYFKIYSKHTPINLVRDLDPQGFSALEPLVDLPIGINITRFQT  
LLALHRSYLTPGDSSSGWTAGAAAYVGYLQPRTFLLKYNENGTITDAVDCALDPLSETK  
CTLKSFTVEKGIYQTSNFRVQPTESIVRFPNITNLCPFGEVFNATRFASVYAWNRRKRISN  
CVADYSVLVNSASFSTFKCYGVSPTKLNLDLCFTNVYADSFVIRGDEVQRQIAPGQTGKIAD  
YNYKLPDDFTGCVIAWNSNNLDSKVGGNYNRYRRLFRKSNLKPFERDISTERIYQAGSKPC  
NGVEGFNCYFPLQSYGFQPTNGVGYQPYRVVVLSEFLLHAPATVCGPKKSTNLVKNKCVN  
FNFNGLTGTGVLTESNKKFLPFQFGRDIADTTDAVRDPQTLEILDITPCSFGGVSVITP  
GTNTSNQVAVLYQGVNCTEVPVAIHADQLTPTWRVYSTGNSVFQTRAGCLIGAEHVNNSY  
ECDIPIGAGICASYQTQTNRRRARSVASQSI IAYTMSLGAENSVAYSNNSIAIPTNFTI  
SVTTEILPVSMTKTSVDCTMYICGDSTECNSLLLQYGSFCTQLNRALTGIAVEQDKNTQE  
VFAQVKQIYKTPPIKDFGGFNFSQILPDPSKPSKRSFIEDLLFNKVTLADAGFIKQYGDC  
LGDIAARDLICAQKFNGLTVLPPLLTDEMIAQYTSALLAGTITSGWTFGAGAALQIPFAM  
QMAYRFNGIGVTONVLYENQKLIANQFNSAIGKIQDSLSTASALGKLQDVVNQNAQALN  
TLVKQLSSNFGAISSVLNDILSRLDKVEAEVQIDRLITGRLQSLQTYVTQQLIRAAEIRA  
SANLAATKMSECVLQSKRVDFCGKGYHLMSFPQSAPHGVVFLHVTVYVPAQEKNFTTAPA  
ICHDGKAHFPREGVFVSNGTHWFVTQRNFYEPQIITDNTFVSGNCDVVI GIVNNTVYDP  
LQPELDSFKEELDKYFKNHTSPDVLGDISGINASVVNIQKEIDRLNEVAKNLNESLIDL  
QELGKYEQYIKWPWYIWLGFIAGLIAIVMVTIMLCCMTSCCSCLKGCCSCGSCCKFDEDD  
SEPVKGVKHLHYT

>lcl|MZ533332.1\_prot\_QXL06391.1\_3 [gene=S] [protein=surface glycoprotein]  
[protein\_id=QXL06391.1] [location=21533..25348] [gbkey=CDS]  
MFVFLVLLPLVSSQCVNLRTRTQLPPAYTNSFTRGVYYPDKVFRSSVLHSTQDLFLPFFS  
NVTWFHAIHVSNGTNGTKRFDNPVLPFNDGVYFASTEKSNIIRGWIFGTTLDSTQSLIV  
NNATNVVIKVECFQFCNDPFLGVYYHKNKSWMESG--VYSSANNCTFEYVSQPFMDLE  
GKQGNFNKLNREFVFKNIDGYFKIYSKHTPINLVRDLDPQGFVLEPLVDLPIGINITRFQT  
LLALHRSYLTPGDSSSGWTAGAAAYVGYLQPRTFLLKYNENGTITDAVDCALDPLSETK  
CTLKSFTVEKGIYQTSNFRVQPTESIVRFPNITNLCPFGEVFNATRFASVYAWNRRKRISN  
CVADYSVLVNSASFSTFKCYGVSPTKLNLDLCFTNVYADSFVIRGDEVQRQIAPGQTGKIAD  
YNYKLPDDFTGCVIAWNSNNLDSKVGGNYNRYRRLFRKSNLKPFERDISTERIYQAGSKPC  
NGVEGFNCYFPLQSYGFQPTNGVGYQPYRVVVLSEFLLHAPATVCGPKKSTNLVKNKCVN  
FNFNGLTGTGVLTESNKKFLPFQFGRDIADTTDAVRDPQTLEILDITPCSFGGVSVITP  
GTNTSNQVAVLYQGVNCTEVPVAIHADQLTPTWRVYSTGNSVFQTRAGCLIGAEHVNNSY  
ECDIPIGAGICASYQTQTNRRRARSVASQSI IAYTMSLGAENSVAYSNNSIAIPTNFTI  
SVTTEILPVSMTKTSVDCTMYICGDSTECNSLLLQYGSFCTQLNRALTGIAVEQDKNTQE  
VFAQVKQIYKTPPIKDFGGFNFSQILPDPSKPSKRSFIEDLLFNKVTLADAGFIKQYGDC  
LGDIAARDLICAQKFNGLTVLPPLLTDEMIAQYTSALLAGTITSGWTFGAGAALQIPFAM  
QMAYRFNGIGVTONVLYENQKLIANQFNSAIGKIQDSLSTASALGKLQDVVNQNAQALN  
TLVKQLSSNFGAISSVLNDILSRLDKVEAEVQIDRLITGRLQSLQTYVTQQLIRAAEIRA  
SANLAATKMSECVLQSKRVDFCGKGYHLMSFPQSAPHGVVFLHVTVYVPAQEKNFTTAPA  
ICHDGKAHFPREGVFVSNGTHWFVTQRNFYEPQIITDNTFVSGNCDVVI GIVNNTVYDP  
LQPELDSFKEELDKYFKNHTSPDVLGDISGINASVVNIQKEIDRLNEVANNLNESLIDL

QELGKYEQYIKWPWYIWLGFIAGLIAIVMVTIMLCCMTSCCSCLKGCCSCGSCCKFDEDD  
SEPVKLGVKLHYT

>lcl|MZ569400.1\_prot\_QX085616.1\_3 [gene=S] [protein=surface glycoprotein]  
[protein\_id=QX085616.1] [location=21524..25339] [gbkey=CDS]  
MFVFLVLLPLVSSQCVNLRTRTQLPPAYTNSFTRGVYYPDKVFRSSVLHSTQDLFLPFFS  
NVTWFHAIHVSNGTNGTKRFDNPVLPFNDGVYFASTEKSNIIRGWIFGTTLDLSDKTSQSLIV  
NNATNVVIKVCFFQFCNDPFLGVYHKNKNSWMESE--VYSSANNCTFEYVSQPFLLMDLE  
GKQGNFKNLREFVFKNIDGYFKIYSKHTPINLVRDLPQGFVLEPLVDLPIGINITRFQT  
LLALHRSYLTPGDSSSGWTAGAAAYVGYLQPRTFLLKYNENGTITDAVDCALDPLSETK  
CTLKSFTVEKGIYQTSNFRVQPTESIVRFPNITNLCPFGEVFNATRFASVYAWNRRKRISN  
CVADYSVLVNSASFSTFKCYGVSPTKLNLDLFCFTNVYADSFVIRGDEVRQIAPGQTGKIAD  
YNYKLPDDFTGCVIAWNSNNLDSKVGGNYNRYRRLFRKSNLKPFERDISTEIQAGSKPC  
NGVEGFNCYFPLQSYGFQPTNGVGYQPYRVVLSFELLHAPATVCGPKKSTNLVKNKCVN  
FNFNGLTGTGVLTESNKKFLPFQFGRDIADTTDAVRDPQTLEILDITPCSFGGVSVITP  
GTNTSNQVAVLYQGVNCTEVPVAIHADQLTPTWRVYSTGNSNVFQTRAGCLIGAEHVNSY  
ECDIPIGAGICASYQTQTSNRRRARSVASQSI IAYTMSLGAENSVAYSNNIAIPTNFTI  
SVTTEILPVSMTKTSVDCTMYICGDSTECNLLLQYGSFCTQLNRALTGIAVEQDKNTQE  
VFAQVKQIYKTPPIKDFGGFNFSQILPDPSKPSKRSFIEDLLFNKVTLADAGFIKQYGDC  
LGDIAARDLICAQKFNGLTVLPLLLTDEMIAQYTSALLAGTITSGWTFGAGAALQIPFAM  
QMAYRFNGIGVTQNVLYENQKLIANQFNFAIGKIQDSLSTASALGKLQDVVNQNAQALN  
TLVKQLSSNFGAISSVLNDILSRLDKVEAEVQIDRLITGRLQSLQTYVTQQILIRAAEIRA  
SANLAATKMSECVLQSKRVDFCGKGYHLMSPQSAPHGVVFLHVTYVPAQEKNFTTAPA  
ICHDKAHFPREGVFSNGTHWFVTQRNFYEPQIITDNTFVSGNCDVVI GIVNNTVYDP  
LQPELDSFKEELDKYFKNHTSPDVLGDISGINASVVNIQKEIDRLNEVANLNESLIDL  
QELGKYEQYIKWPWYIWLGFIAGLIAIVMVTIMLCCMTSCCSCLKGCCSCGSCCKFDEDD  
SEPVKLGVKLHYT

>lcl|MW966801.1\_prot\_QTY85444.1\_3 [gene=S] [protein=surface glycoprotein]  
[protein\_id=QTY85444.1] [location=21561..25376] [gbkey=CDS]  
MFVFLVLLPLVSSQCVNLRTRTQLPPAYTNSFTRGVYYPDKVFRSSVLHSTQDLFLPFFS  
NVTWFHAIHVSNGTNGTKRFDNPVLPFNDGVYFASTEKSNIIRGWIFGTTLDLSDKTSQSLIV  
NNATNVVIKVCFFQFCNDPFLGVYHKNKNSWMESE--VYSSANNCTFEYVSQPFLLMDLE  
GKQGNFKNLREFVFKNIDGYFKIYSKHTPINLVRDLPQGFVLEPLVDLPIGINITRFQT  
LLALHRSYLTPGDSSSGWTAGAAAYVGYLQPRTFLLKYNENGTITDAVDCALDPLSETK  
CTLKSFTVEKGIYQTSNFRVQPTESIVRFPNITNLCPFGEVFNATRFASVYAWNRRKRISN  
CVADYSVLVNSASFSTFKCYGVSPTKLNLDLFCFTNVYADSFVIRGDEVRQIAPGQTGKIAD  
YNYKLPDDFTGCVIAWNSNNLDSKVGGNYNRYRRLFRKSNLKPFERDISTEIQAGSKPC  
NGVEGFNCYFPLQSYGFQPTNGVGYQPYRVVLSFELLHAPATVCGPKKSTNLVKNKCVN  
FNFNGLTGTGVLTESNKKFLPFQFGRDIADTTDAVRDPQTLEILDITPCSFGGVSVITP  
GTNTSNQVAVLYQGVNCTEVPVAIHADQLTPTWRVYSTGNSNVFQTRAGCLIGAEHVNSY  
ECDIPIGAGICASYQTQTSNRRRARSVASQSI IAYTMSLGAENSVAYSNNIAIPTNFTI  
SVTTEILPVSMTKTSVDCTMYICGDSTECNLLLQYGSFCTQLNRALTGIAVEQDKNTQE  
VFAQVKQIYKTPPIKDFGGFNFSQILPDPSKPSKRSFIEDLLFNKVTLADAGFIKQYGDC  
LGDIAARDLICAQKFNGLTVLPLLLTDEMIAQYTSALLAGTITSGWTFGAGAALQIPFAM  
QMAYRFNGIGVTQNVLYENQKLIANQFNFAIGKIQDSLSTASALGKLQDVVNQNAQALN  
TLVKQLSSNFGAISSVLNDILSRLDKVEAEVQIDRLITGRLQSLQTYVTQQILIRAAEIRA  
SANLAATKMSECVLQSKRVDFCGKGYHLMSPQSAPHGVVFLHVTYVPAQEKNFTTAPA  
ICHDKAHFPREGVFSNGTHWFVTQRNFYEPQIITDNTFVSGNCDVVI GIVNNTVYDP  
LQPELDSFKEELDKYFKNHTSPDVLGDISGINASVVNIQKEIDRLNEVAKLNESLIDL  
QELGKYEQYIKWPWYIWLGFIAGLIAIVMVTIMLCCMTSCCSCLKGCCSCGSCCKFDEDD  
SEPVKLGVKLHYT

>lcl|MZ566140.1\_prot\_QX029137.1\_3 [gene=S] [protein=surface glycoprotein]  
[protein\_id=QX029137.1] [location=21533..25348] [gbkey=CDS]  
MFVFLVLLPLVSSQCVNLRTRTQLPPAYTNSFTRGVYYPDKVFRSSVLHSTQDLFLPFFS  
NVTWFHAIHVSNGTNGTKRFDNPVLPFNDGVYFASTEKSNIIRGWIFGTTLDLSDKTSQSLIV  
NNATNVVIKVCFFQFCNDPFLGVYHKNKNSWMESE--VYSSANNCTFEYVSQPFLLMDLE  
GKQGNFKNLREFVFKNIDGYFKIYSKHTPINLVRDLPQGFVLEPLVDLPIGINITRFQT  
LLALHRSYLTPGDSSSGWTAGAAAYVGYLQPRTFLLKYNENGTITDAVDCALDPLSETK  
CTLKSFTVEKGIYQTSNFRVQPTESIVRFPNITNLCPFGEVFNATRFASVYAWNRRKRISN



CVADYSVLNSASFSTFKCYGVSPTKLNLDLCFTNVYADSFVIRGDEVQRQIAPGQTGKIAD  
YNYKLPDDFTGCVIAWNSNNLDSKVGGNYNRYRRLFRKSNLKPFFERDI STEIYQAGSKPC  
NGVEGFNCYFPLQSYGFQPTNGVGYQPYRVVLSFELLHAPATVCGPKKSTNLVKNKCVN  
FNFNGLTGTGVLTESNKKFLPFQQFGRDIADTTDAVRDPQTEILDITPCSFGGVSVITP  
GTNTSNQVAVLYQGVNCTEVPVAIHADQLTPTWRVYSTGNSVFQTRAGCLIGAHEVNNSY  
ECDIPIGAGICASYQTQTNRRRARSVASQSI IAYTMSLGAENSVAYSNNSIAIPTNFTI  
SVTTEILPVSMTKTSVDCTMYICGDSTECNSLLQYGSFCTQLNRALTGIAVEQDKNTQE  
VFAQVKQIYKTPPIKDFGGFNFSQILPDPSKPSKRSFIEDLLFNKVTLADAGFIKQYGDC  
LGDIAARDLICAQKFNGLTVLPPLLTDEMIAQYTSALLAGTITSGWTFGAGAALQIPFAM  
QMAYRFNGIGVTQNVLYENQKLIANQFNSAIGKIQDSLSTASALGKLQDVVNQNAQALN  
TLVKQLSSNFGAISSVLNDILSRLDKVEAEVQIDRLITGRLQSLQTYVTQQLIRAAEIRA  
SANLAATKMSECVLQSKRVDFCGKGYHLMSFPQSAPHGVVFLHVTYVPAQEKNFTTAPA  
ICHGKAHFPREGVFSNGTHWFVTQRNFYEPQIITDNTFVSGNCDVVI GIVNNTVYDP  
LQPELDSFKEELDKYFKNHTSPDVLGDISGINASVVNIQKEIDRLNEVAKNLNESLIDL  
QELGKYEQYIKWPWYIWLGFIAGLIAIVMVTIMLCCMTSCCSCLKGCCSCGSCCKFDEDD  
SEPVKGVKLYHT

>lcl|MZ401494.1\_prot\_QWT56303.1\_3 [gene=S] [protein=surface glycoprotein]

[protein\_id=QWT56303.1] [location=21513..25328] [gbkey=CDS]  
MFVFLVLLPLVSSQCVNLRTRTQLPPAYTNSFTRGVYYPDKVFRSSVLHSTQDFFLPFFS  
NVTWFHAIHVSGTNGTKRFDNPVLPFNDGVYFASTEKSNIIRGWIFGTTLDSTQSLIV  
NNATNVVIKVCFFQFCNDPFLDVYYHKNNKSWMESG--VYSSANNCTFEYVSQPFMDLE  
GKQGNFKNLREFVFKNIDGYFKIYSKHTPINLVRDLPQGFVLEPLVDLPIGINITRFQT  
LLALHRSYLT PGDSSSGWTAGAAAYVGYLQPRTFLLKYNENGTITDAVDCALDPLSETK  
CTLKSFTVEKGIYQTSNFRVQPTESIVRFPNITNLCPFGEVFNATRFASVYAWNRKRISN  
CVADYSVLNSASFSTFKCYGVSPTKLNLDLCFTNVYADSFVIRGDEVQRQIAPGQTGKIAD  
YNYKLPDDFTGCVIAWNSNNLDSKVGGNYNRYRRLFRKSNLKPFFERDI STEIYQAGSKPC  
NGVEGFNCYFPLQSYGFQPTNGVGYQPYRVVLSFELLHAPATVCGPKKSTNLVKNKCVN  
FNFNGLTGTGVLTESNKKFLPFQQFGRDIADTTDAVRDPQTEILDITPCSFGGVSVITP  
GTNTSNQVAVLYQGVNCTEVPVAIHADQLTPTWRVYSTGNSVFQTRAGCLIGAHEVNNSY  
ECDIPIGAGICASYQTQTNRRRARSVASQSI IAYTMSLGAENSVAYSNNSIAIPTNFTI  
SVTTEILPVSMTKTSVDCTMYICGDSTECNSLLQYGSFCTQLNRALTGIAVEQDKNTQE  
VFAQVKQIYKTPPIKDFGGFNFSQILPDPSKPSKRSFIEDLLFNKVTLADAGFIKQYGDC  
LGDIAARDLICAQKFNGLTVLPPLLTDEMIAQYTSALLAGTITSGWTFGAGAALQIPFAM  
QMAYRFNGIGVTQNVLYENQKLIANQFNSAIGKIQDSLSTASALGKLQDVVNQNAQALN  
TLVKQLSSNFGAISSVLNDILSRLDKVEAEVQIDRLITGRLQSLQTYVTQQLIRAAEIRA  
SANLAATKMSECVLQSKRVDFCGKGYHLMSFPQSAPHGVVFLHVTYVPAQEKNFTTAPA  
ICHGKAHFPREGVFSNGTHWFVTQRNFYEPQIITDNTFVSGNCDVVI GIVNNTVYDP  
LQPELDSFKEELDKYFKNHTSPDVLGDISGINASVVNIQKEIDRLNEVAKNLNESLIDL  
QELGKYEQYIKWPWYIWLGFIAGLIAIVMVTIMLCCMTSCCSCLKGCCSCGSCCKFDEDD  
SEPVKGVKLYHT

>lcl|MZ254548.1\_prot\_QVO42894.1\_3 [gene=S] [protein=surface glycoprotein]

[protein\_id=QVO42894.1] [location=21509..25324] [gbkey=CDS]  
MFVFLVLLPLVSSQCVNLRTRTQLPPAYTNSFTRGVYYPDKVFRSSVLHSTQDLFLPFFS  
NVTWFHAIHVSGTNGTKRFDNPVLPFNDGVYFASTEKSNIIRGWIFGTTLDSTQSLIV  
NNATNVVIKVCFFQFCNDPFLDVYYHKNNKSWMESG--VYSSANNCTFEYVSQPFMDLE  
GKQGNFKNLREFVFKNIDGYFKIYSKHTPINLVRDLPQGFVLEPLVDLPIGINITRFQT  
LLALHRSYLT PGDSSSGWTAGAAAYVGYLQPRTFLLKYNENGTITDAVDCALDPLSETK  
CTLKSFTVEKGIYQTSNFRVQPTESIVRFPNITNLCPFGEVFNATRFASVYAWNRKRISN  
CVADYSVLNSASFSTFKCYGVSPTKLNLDLCFTNVYADSFVIRGDEVQRQIAPGQTGKIAD  
YNYKLPDDFTGCVIAWNSNNLDSKVGGNYNRYRRLFRKSNLKPFFERDI STEIYQAGSKPC  
NGVEGFNCYFPLQSYGFQPTNGVGYQPYRVVLSFELLHAPATVCGPKKSTNLVKNKCVN  
FNFNGLTGTGVLTESNKKFLPFQQFGRDIADTTDAVRDPQTEILDITPCSFGGVSVITP  
GTNTSNQVAVLYQGVNCTEVPVAIHADQLTPTWRVYSTGNSVFQTRAGCLIGAHEVNNSY  
ECDIPIGAGICASYQTQTNRRRARSVASQSI IAYTMSLGAENSVAYSNNSIAIPTNFTI  
SVTTEILPVSMTKTSVDCTMYICGDSTECNSLLQYGSFCTQLNRALTGIAVEQDKNTQE  
VFAQVKQIYKTPPIKDFGGFNFSQILPDPSKPSKRSFIEDLLFNKVTLADAGFIKQYGDC  
LGDIAARDLICAQKFNGLTVLPPLLTDEMIAQYTSALLAGTITSGWTFGAGAALQIPFAM  
QMAYRFNGIGVTQNVLYENQKLIANQFNSAIGKIQDSLSTASALGKLQDVVNQNAQALN

TLVKQLSSNFGAISSVLNDILSRDKVEAEVQIDRLITGRLQSLQTYVTQQLIRAAEIRA  
SANLAATKMSECVLGGSKRVDFCGKGYHLSFPPQSAPHGVVFLHVTYVPAQEKNFTTAPA  
ICHGKAHFPREGVFVSNGTHWFVTQRNFYEPQIITDNTFVSGNCDVVI GIVNNTVYDP  
LQPELDSFKEELDKYFKNHTSPDVDLGDISGINASVVNIQKEIDRLNEVAKNLNESLIDL  
QELGKYEQYIKWPWYIWLGFIAGLIAIVMVTIMLCCMTSCCSCLKGCCSCGSCCKFDEDD  
SEPVKGVKHLHYT

>lcl|MZ318159.1\_prot\_QWB14967.1\_3 [gene=S] [protein=surface glycoprotein]  
[protein\_id=QWB14967.1] [location=21513..25328] [gbkey=CDS]  
MFVFLVLLPLVSSQCVNLRTRTQLPPAYTNSFTRGVYYPDKVFRSSVLHSTQDLFLPFFS  
NVTWFHAIHVSGTNGTKRFDNPFVLPFNDGVYFASTEKSNIIRGWIFGTTLDSKTQSLIV  
NNATNVVIKVFCEQFCNDPFLDVYYHKNKSWMESG--VYSSANNCTFEYVSQPFMLDLE  
GKQGNFKNLREFVFKNIDGYFKIYSKHTPINLVRDLPPQGFVLEPLVDLPIGINITRFQT  
LLALHRSYLTPGDSSSGWTAGAAAYVGYLQPRTFLLKYNENGTITDAVDCALDPLSETK  
CTLKSFTVEKGIYQTSNFRVQPTESIVRFPNITNLCPFGEVFNATRFASVYAWNRRKRISN  
CVADYSVLVNSASFSTFKCYGVSPTKLNLDLCFTNVYADSFVIRGDEVQRQIAPGQTGKIAD  
YNYKLPDDFTGCVIAWNSNNLDSKVGGNYNRYRFLFRKSNLKPFERDISTERIYQAGSKPC  
NGVEGFNCYFPLQSYGFQPTNGVGYQPYRVVLSFELLHAPATVCGPKKSTNLVKNKCVN  
FNFENGLTGTGVLTESNKKFLPFQQFGRDIADTTDAVRDPQTLEILDITPCSFGGVSVITP  
GTNTSNQVAVLYQGVNCTEVPVAIHADQLTPTWRVYSTGNSVFNQTRAGCLIGAEHVNSY  
ECDIPIGAGICASYQTQTSNRRRARSVASQSI IAYTMSLGAENSVAYSNNNSIAIPTNFTI  
SVTTEILPVSMTKTSVDCTMYICGDSTECNSLLLQYGSFCTQLNRALTGIAVEQDKNTQE  
VFAQVKQIYKTPPIKDFGGFNFSQILPDPSKPSKRSFIEDLLFNKVTLADAGFIKQYGDC  
LGDIAARDLCAQKFNGLTVLPPLLTDEMIAQYTSALLAGTITSGWTFGAGAALQIPFAM  
QMAYRFNGIGVTONVLYENQKLIANQFNSAIGKIQDSLSTASALGKLQDVVNQNAQALN  
TLVKQLSSNFGAISSVLNDILSRDKVEAEVQIDRLITGRLQSLQTYVTQQLIRAAEIRA  
SANLAATKMSECVLGGSKRVDFCGKGYHLSFPPQSAPHGVVFLHVTYVPAQEKNFTTAPA  
ICHGKAHFPREGVFVSNGTHWFVTQRNFYEPQIITDNTFVSGNCDVVI GIVNNTVYDP  
LQPELDSFKEELDKYFKNHTSPDVDLGDISGINASVVNIQKEIDRLNEVAKNLNESLIDL  
QELGKYEQYIKWPWYIWLGFIAGLIAIVMVTIMLCCMTSCCSCLKGCCSCGSCCKFDEDD  
SEPVKGVKHLHYT

>lcl|MZ401504.1\_prot\_QWT56703.1\_3 [gene=S] [protein=surface glycoprotein]  
[protein\_id=QWT56703.1] [location=21513..25328] [gbkey=CDS]  
MFVFLVLLPLVSSQCVNLRTRTQLPPAYTNSFTRGVYYPDKVFRSSVLHSTQDLFLPFFS  
NVTWFHAIHVSGTNGTKRFDNPFVLPFNDGVYFASTEKSNIIRGWIFGTTLDSKTQSLIV  
NNATNVVIKVFCEQFCNDPFLDVYYHKNKSWMESG--VYSSANNCTFEYVSQPFMLDLE  
GKQGNFKNLREFVFKNIDGYFKIYSKHTPINLVRDLPPQGFVLEPLVDLPIGINITRFQT  
LLALHRSYLTPGDSSSGWTAGAAAYVGYLQPRTFLLKYNENGTITDAVDCALDPLSETK  
CTLKSFTVEKGIYQTSNFRVQPTESIVRFPNITNLCPFGEVFNATRFASVYAWNRRKRISN  
CVADYSVLVNSASFSTFKCYGVSPTKLNLDLCFTNVYADSFVIRGDEVQRQIAPGQTGKIAD  
YNYKLPDDFTGCVIAWNSNNLDSKVGGNYNRYRFLFRKSNLKPFERDISTERIYQAGSKPC  
NGVEGFNCYFPLQSYGFQPTNGVGYQPYRVVLSFELLHAPATVCGPKKSTNLVKNKCVN  
FNFENGLTGTGVLTESNKKFLPFQQFGRDIADTTDAVRDPQTLEILDITPCSFGGVSVITP  
GTNTSNQVAVLYQGVNCTEVPVAIHADQLTPTWRVYSTGNSVFNQTRAGCLIGAEHVNSY  
ECDIPIGAGICASYQTQTSNRRRARSVASQSI IAYTMSLGAENSVAYSNNNSIAIPTNFTI  
SVTTEILPVSMTKTSVDCTMYICGDSTECNSLLLQYGSFCTQLNRALTGIAVEQDKNTQE  
VFAQVKQIYKTPPIKDFGGFNFSQILPDPSKPSKRSFIEDLLFNKVTLADAGFIKQYGDC  
LGDIAARDLCAQKFNGLTVLPPLLTDEMIAQYTSALLAGTITSGWTFGAGAALQIPFAM  
QMAYRFNGIGVTONVLYENQKLIANQFNSAIGKIQDSLSTASALGKLQDVVNQNAQALN  
TLVKQLSSNFGAISSVLNDILSRDKVEAEVQIDRLITGRLQSLQTYVTQQLIRAAEIRA  
SANLAATKMSECVLGGSKRVDFCGKGYHLSFPPQSAPHGVVFLHVTYVPAQEKNFTTAPA  
ICHGKAHFPREGVFVSNGTHWFVTQRNFYEPQIITDNTFVSGNCDVVI GIVNNTVYDP  
LQPELDSFKEELDKYFKNHTSPDVDLGDISGINASVVNIQKEIDRLNEVAKNLNESLIDL  
QELGKYEQYIKWPWYIWLGFIAGLIAIVMVTIMLCCMTSCCSCLKGCCSCGSCCKFDEDD  
SEPVKGVKHLHYT
